# Supplementary material for: Cnidom in Ceriantharia (Cnidaria, Anthozoa): new findings in the composition and micrometric variations of cnidocysts
Source: PeerJ. 2023 Jun 21;11:e15549. doi: 10.7717/peerj.15549 (PMC10290448; doi:10.7717/peerj.15549)
Supplement: Supplemental Information 1 — Measurements of cnidocysts size and its proportions in each segment. The raw data show all size of cnida types find in each structure and its proportions from all examined individuals of both species studied. [file peerj-11-15549-s001.xlsx]

## Sheet: Ceriantheomorphe brasiliensis
cnida type_w=length		cnida type_w= width
Marginal tentacles
Specimen	tentacle n°	Level	atrich_l	atrich_w	mbI_l	mbI_w	mbII_l	mbII_w	mbIII_l	mbIII_w	mbV_l	mbV_w	mbVI_l	mbVI_w
1	1	low					26.99	6.6
1	1	low					31.37	5.88
1	1	low					29.74	4.61
1	1	low					28.82	5
1	1	low					31.38	4.71
1	1	low					30.07	4.31
1	1	low					33.8	5.43
1	1	low					32.11	4.39
1	1	low					32.71	5.05
1	1	low					30.45	4.32
1	1	low					31.08	4.08
1	1	low					30.13	4.66
1	1	low					30.01	6.39
1	1	low					33.42	6.1
1	1	low					27.6	3.59
1	1	low					31.4	4.08
1	1	low					29.82	4.52
1	1	low					28.99	4.88
1	1	low					32.42	5.55
1	1	low					32.31	4.74
1	1	low					30.46	4.76
1	1	low					30.6	4.68
1	1	low					29.71	3.92
1	1	low					30.47	4.52
1	1	low					30.89	4.31
1	1	low					33.74	4.66
1	1	low					29.83	4.2
1	1	low					29.41	4.99
1	1	low					30.27	3.82
1	1	low					31.3	4.46
1	1	middle					33.99	4.77
1	1	middle					32.38	4.76
1	1	middle					31.9	4.51
1	1	middle					36.32	4.9
1	1	middle					36.04	5.14
1	1	middle					35.13	4.73
1	1	middle					32.67	4.67
1	1	middle					36.8	4.98
1	1	middle					32.99	5.67
1	1	middle					34.34	6.14
1	1	middle					35.55	5.21
1	1	middle					37.14	4.93
1	1	middle					33.3	4.46
1	1	middle					32.1	4.39
1	1	middle					34.08	4.51
1	1	middle					30.94	5
1	1	middle					31.32	5.35
1	1	middle					34.05	4.97
1	1	middle					31.23	5.19
1	1	middle					33.65	5.35
1	1	middle					35.05	5
1	1	middle					34.06	6.31
1	1	middle					34.61	4.91
1	1	middle					32.42	4.75
1	1	middle					32.54	4.94
1	1	middle					31.91	5.38
1	1	middle					34.12	5.14
1	1	middle					32.75	4.78
1	1	middle					30.75	5.64
1	1	middle					33.96	4.82
1	1	high			61.68	11.26	36.83	6.29
1	1	high			59.83	11.7	31.95	5.17
1	1	high			62.25	10.39	32.24	5.03
1	1	high			64.11	9.8	30.92	4.27
1	1	high			58.7	9.48	39.54	6.05
1	1	high			61.72	11.37	34.11	5.46
1	1	high			63.45	7.92	36.89	6.09
1	1	high			61.46	10.32	35.98	6.1
1	1	high			65.24	9.66	38.39	4.55
1	1	high			59.73	9.3	37.69	5.3
1	1	high			63.79	11.13	33.47	5.39
1	1	high			60.36	9.91	35.71	4.65
1	1	high			68.24	11.73	34.52	4.8
1	1	high			60.72	10.48	36.39	4.51
1	1	high			61.85	11.48	36.12	5.43
1	1	high			63.5	10.61	35.4	5.03
1	1	high			60.97	8.64	35.26	5.57
1	1	high			60.16	9.34	36.01	5.09
1	1	high			50.32	8.9	34.04	5.19
1	1	high			59.06	9.87	35.22	5.37
1	1	high			59.67	10.82	34.09	4.73
1	1	high			63.11	9.11	34.39	5.79
1	1	high			56.32	10.23	32.54	6.13
1	1	high			57.89	9.35	33.93	5.58
1	1	high			60.3	9.47	34.83	6.24
1	1	high			60.99	9.32	33.48	5.43
1	1	high			62.25	9.8	33.69	4.33
1	1	high			63.77	9.1	36	5.96
1	1	high			58.04	9.24	34.42	5.21
1	1	high			59.14	9.37	36.25	5.8
2	1	low	36.24	5.75
2	1	low	31.22	5.93
2	1	low	29.97	5.61
2	1	low	36.47	6.95
2	1	low	35.17	5.54
2	1	low	35.77	5.35
2	1	low	36.05	5.57
2	1	low	36.09	6.47
2	1	low	36.23	5.98
2	1	low	34.7	5.99
2	1	low	31.19	5.26
2	1	low	36.18	6.7
2	1	low	31.41	7.73
2	1	low	35.46	5.56
2	1	low	33.19	5.95
2	1	low	34.59	6.07
2	1	low	34	5.59
2	1	low	34.46	5.96
2	1	low	28.67	5.22
2	1	low	33.29	5.85
2	1	low	35.11	5.49
2	1	low	30.05	6.11
2	1	low	31.45	5.11
2	1	low	38.34	5.72
2	1	low	30.95	4.92
2	1	low	31.09	6.35
2	1	low	30.1	5.5
2	1	low	32.52	6.48
2	1	low	33.25	6.38
2	1	low	27.78	5.5
3	1	low	33.32	8.03			22.98	4.55
3	1	low	32.71	6.72			23.84	4.99
3	1	low	38.27	6.27			24.93	4.18
3	1	low	33.65	5.8			22.58	4.62
3	1	low	33.81	5.6			22.33	3.99
3	1	low	34.66	5.21			25.62	5.45
3	1	low	35.11	5.31			30.29	4.26
3	1	low	39.45	5.91			31.04	5.9
3	1	low	35.22	4.52			24.24	4.63
3	1	low	37.66	5.86			27.38	4.79
3	1	low	26.44	4.37			24.2	3.69
3	1	low	40.74	5.95			31.36	5.75
3	1	low	31.12	7.17			23.79	4.26
3	1	low	33.53	4.75			24.98	3.83
3	1	low	31.52	5.05			24.98	3.61
3	1	low	33.71	5.86			33.75	3.86
3	1	low	33.22	4.64			35.61	5.47
3	1	low	35.67	4.96			35.82	6.54
3	1	low	35.86	5.3			34.41	4.73
3	1	low	35.02	5.19			34.54	4.67
3	1	low	33.99	4.48			40.38	5.57
3	1	low	34.25	4.47			37.91	5.37
3	1	low	41.77	5.58			32.23	4.65
3	1	low	36.5	6.53			34.14	5.5
3	1	low	36.3	5.76			38.24	4.84
3	1	low	37.94	5.21			35.52	4.21
3	1	low	37.71	4.82			34.87	4.8
3	1	low	33.55	5.72			41.27	5.03
3	1	low	33.4	5.31			34.72	4.68
3	1	low	36.83	5.58			26.61	3.98
4	1	low	35.28	5.88			27.82	4.38
4	1	low	35.78	6.43			28.12	4.16
4	1	low	44.48	9.68			27.99	4.84
4	1	low	40.41	6.46			28.61	3.77
4	1	low	33.7	6.59			24.58	3.65
4	1	low	35.95	5.51			30.14	3.72
4	1	low	38.51	6.93			27.86	3.64
4	1	low	32.84	5.58			27.11	3.81
4	1	low	37.1	6.47			24.94	3.44
4	1	low	34.87	6.14			31.29	3.21
4	1	low	34.6	6.27			29.82	4.46
4	1	low	36.23	5.95			29.69	3.73
4	1	low	35.21	6.44			27.37	3.95
4	1	low	39.27	5.56			28.83	3.18
4	1	low	36.48	6.67			26.61	3.81
4	1	low	36.96	7.07			28.85	4.23
4	1	low	42.39	6.37			28.3	4.21
4	1	low	45.94	6.54			29.38	4.25
4	1	low	38.94	5.54			23.92	4.13
4	1	low	34.12	6.26			31.92	4.21
4	1	low	36.71	5.68			27.61	3.96
4	1	low	36.71	6.27			24.08	3.57
4	1	low	33.17	5.07			25.94	3.16
4	1	low	40.55	6.03			25.32	4.43
4	1	low	38.86	6.57			25.35	3.87
4	1	low	38.63	6.73			27.11	3.33
4	1	low	42.09	6.36			21.34	3.41
4	1	low	37.38	6.12			23.51	3.77
4	1	low	34.6	5.74			21.85	3.64
4	1	low	36.11	6
5	1	low	39.4	8.36			25.75	4.47
5	1	low	37.54	6.69			35.57	6.35
5	1	low	39.46	7.87			26.18	5.42
5	1	low	37.99	6.42			24.89	3.79
5	1	low	39.71	6.66			26.88	4.8
5	1	low	40.51	8.02			28.2	3.76
5	1	low	42.73	8			26.97	4.09
5	1	low	41.95	8			29.27	3.87
5	1	low	37.81	6.2			26.42	4.43
5	1	low	32.35	6.5			27.62	4.75
5	1	low	42.72	7.25			25.3	3.95
5	1	low	34.28	5.39			28.81	3.97
5	1	low	39.66	5.72			30.5	4.72
5	1	low	35.62	5.8			27.98	4.21
5	1	low	39.97	6.93			29.19	4.71
5	1	low	38.85	5.41			33.5	5.78
5	1	low	38.92	5.59			29.98	5.64
5	1	low	39.94	6.27			36.65	4.81
5	1	low	40.72	6.46			28.84	6.81
5	1	low	38.66	5.99			30.21	5.59
5	1	low	40.37	5.83			30.74	5.36
5	1	low	39.52	5.88			33.22	5.55
5	1	low	37.15	7.05			25.41	5.04
5	1	low	37.12	7.66			27.36	4.84
5	1	low	41.84	8.23			24.62	5.05
5	1	low	46.15	8.86			25.29	4.7
5	1	low	39.76	7.91			25.55	4.47
5	1	low	40	8.31			26	4.9
5	1	low	34.3	8.82			28.74	5.72
5	1	low	36.34	8.59			26.21	3.66
6	1	low					27.22	4.43
6	1	low					28	5.69
6	1	low					27.87	6.11
6	1	low					30	5.62
6	1	low					27.35	5.42
6	1	low					26.2	7.17
6	1	low					25.51	5.62
6	1	low					28.73	6.91
6	1	low					26.64	5.66
6	1	low					25.53	6.94
6	1	low					28.84	8.84
6	1	low					32.09	6.4
6	1	low					24.19	5.62
6	1	low					28.34	5.42
6	1	low					26.73	5.44
6	1	low					26.1	6.24
6	1	low					28.69	6.18
6	1	low					28.98	6.1
6	1	low					26.32	5.38
6	1	low					25.67	6.66
6	1	low					22.65	4.73
6	1	low					24.32	4.65
6	1	low					24.28	5.12
6	1	low					28.83	6.1
6	1	low					26.95	4.8
6	1	low					24.72	6.17
6	1	low					29.7	6.19
6	1	low					25	6.87
6	1	low					33	7.2
6	1	low					32.97	6.77
7	1	low					26.97	5
7	1	low					29.02	5.58
7	1	low					24.21	3.93
7	1	low					32.24	4.16
7	1	low					25.27	4.65
7	1	low					33.1	5.19
7	1	low					32.82	4.1
7	1	low					28.23	4.55
7	1	low					26.01	3.82
7	1	low					34.33	4.57
7	1	low					27.24	4.2
7	1	low					32.43	4.05
7	1	low					27.52	3.49
7	1	low					30.69	4.72
7	1	low					30.11	5.49
7	1	low					30.29	5.04
7	1	low					29.7	4.41
7	1	low					33.63	4.12
7	1	low					30.32	4.06
7	1	low					28.34	4.34
7	1	low					24.13	4.67
7	1	low					30	4.08
7	1	low					29.01	3.82
7	1	low					32.16	3.86
7	1	low					26.78	3.67
7	1	low					27.96	3.4
7	1	low					30.88	4.94
7	1	low					30.23	4
7	1	low					28.43	3.93
7	1	low					32.82	4.97
8	1	low	50.63	7.11			46.76	8.32					60.68	6.68
8	1	low	59.85	8.54			42.65	7.2					55.2	5.78
8	1	low	62.55	9.53			41.79	6.23					55.48	6.26
8	1	low	50.86	5.66			46.07	9.5					65.18	5.87
8	1	low	55.98	7.47			42.05	6.64					60.14	6.05
8	1	low	52.2	8.08			45.47	8.43					59.54	5.73
8	1	low	50.02	8.39			42.03	6.46					64.8	5.94
8	1	low	49.81	6.01			42.21	7.41					63.81	6.1
8	1	low	50.99	4.92			35.42	7.56					61.22	6.39
8	1	low	55.91	7.37			42.93	6.89					66.25	7.03
8	1	low	56.23	10.26			37.36	6.52					65.03	7.5
8	1	low	54.83	7.25			49	7.77					60.17	6.09
8	1	low	49.01	6.39			38.01	4.71					64.57	6.49
8	1	low	55.84	9.64			42.2	8.26					60.2	5.32
8	1	low	54.52	8.33			37.76	6.3					66.01	5.75
8	1	low	55.33	8.75			40.77	8.66					64.91	5.25
8	1	low	55.56	10.22			40.43	6.69					62.08	5.75
8	1	low	49.15	6.43			40.08	6.19					59.18	6.23
8	1	low	51.86	7.37			36.96	7.5					49.49	3.93
8	1	low	49.92	8.83			32.98	3.97					64.47	6.7
8	1	low	58.57	8.02			48.97	8.34					58.33	5.69
8	1	low	53.89	7.3			46.6	7.51					60.27	5.21
8	1	low	60.63	8.1			42.04	5.64					60.04	5.85
8	1	low	44.98	8.46			39.17	6.7					61.26	6.89
8	1	low	50.42	7.01			44.4	6.85					64.71	6.49
8	1	low	50.06	6.78			41.18	7.23					60.3	5.08
8	1	low	47.16	5.69			43.54	7.23					58.01	6.29
8	1	low	50.78	7.33			43.64	8.02					63.92	7.16
8	1	low	54.13	6.68			44.45	8.35					65.64	6.77
8	1	low	51.7	6.95			43.57	7.3					53.12	6.99
9	1	low	44.29	11.36			31.89	4.79			28.58	3.44
9	1	low	44.42	10.89			32.49	5.33			30.55	2.93
9	1	low	45.02	6.8			33.78	6.47			31.46	3.11
9	1	low	47.64	11.83			38.8	5.87			32.87	3.37
9	1	low	49.65	11.2			33.38	5.02			32.17	3.85
9	1	low	52.83	11.27			37.26	5.78			31.09	3.8
9	1	low	45.23	10.29			36.99	5.64			27.68	3.52
9	1	low	44.34	6.5			39.12	6.6			29.9	3.31
9	1	low	47.4	13.35			40.14	7.14			27.91	4.13
9	1	low	52.62	11.98			36.07	6.04			32.34	3.2
9	1	low	49.56	11.77			34.76	6.08			31.14	4.22
9	1	low	55.93	10.74			36.18	6.7			32.6	3.34
9	1	low	49.53	10.38			35.01	5.71			30.09	3.73
9	1	low	49.27	12.96			35.32	6.18			28.6	2.92
9	1	low	50.3	11.25			36.92	6.43			29.38	4.23
9	1	low	47.91	12			34.06	5.21			31.57	3.63
9	1	low	46.35	11.4			37.63	6.26			30.66	3.01
9	1	low	52.22	11.43			31.27	5.56			31.27	3.71
9	1	low	42.24	12.95			32.55	5.52			30.37	3.25
9	1	low	45.52	10.31			36.11	7.16			30.89	3.33
9	1	low	49.96	11.23			38.24	7.85			32.14	3.16
9	1	low	49.7	12.01			38.69	6.3			31.78	3.33
9	1	low	47.35	11.93			38.52	7.05			31.71	3.99
9	1	low	48.49	10.41			31.7	6.23			31.16	4.13
9	1	low	48.5	11.88			36.38	5.44			32.01	4.33
9	1	low	47.12	12.68			30.63	5.09			33.04	3.82
9	1	low	47.14	11.38			33.3	5.49			24.16	3.8
9	1	low	47.6	12.26			36.81	5.73			29.38	3.56
9	1	low	41.19	10.65			38.59	7.14			31.33	4.05
9	1	low	48.21	12.51			37.33	7.03			35.13	3.16
10	1	low	37.67	7.76			40	5.57	23.07	3.4	22.55	2.93
10	1	low	36.53	7.29			37.96	5.31	20.86	2.39	27.22	3.18
10	1	low	39.84	6.33			33.7	3.39	22.7	3.33	26.5	3.15
10	1	low	36.8	8.56			34.62	7.39	20.74	3.15	26.5	3.32
10	1	low	43.69	11.33			39.76	7.17	22.55	2.93	24.36	2.86
10	1	low	43.77	9.21			39.37	5.94	22.16	3.27	23.85	2.55
10	1	low	35.13	8.98			42.93	7.55	20.74	2.75	26.36	3.18
10	1	low	45.78	10.23			44.34	6.09	22.39	3.39	23.69	2.99
10	1	low	42.12	8.1			33.33	6.22	22.26	2.98	24.06	3.27
10	1	low	38.82	7.87			31.32	4.69	22.01	2.69	27.24	3.7
10	1	low	38.78	7.97			37.99	5.83	23.36	2.82	24.21	3.62
10	1	low	39.47	7.97			34.37	5.57	22.87	3.15	23.23	3.41
10	1	low	38.35	7			37.18	5.74	22.32	2.83	25.02	2.98
10	1	low	42.62	7.39			28.59	4.63	21.48	3.02	25.63	3.24
10	1	low	41.81	6.38			34.9	5.85	22.82	3.21	26.07	3.13
10	1	low	35.47	6.5			35.34	6.14	21.73	3.25	24.47	3.88
10	1	low	36.06	5.99			37.29	5.53	21.34	3.15	25.62	3.56
10	1	low	33.69	6.72			36.87	5.85	21.24	3.32	25.81	3.11
10	1	low	40.36	6.33			32.42	4.53	18.23	2.87	22.4	2.46
10	1	low	36.04	6			36.81	4.93	18.94	2.93	23.69	2.98
10	1	low	41.15	7.25			36.37	5.04	19.29	2.49	25.07	2.68
10	1	low	33.82	6.17			35.98	4.72	18.37	2.77	24.23	2.68
10	1	low	36.28	5.99			30.39	4.43	18.31	2.65	25.12	2.85
10	1	low	38.61	7.45			36.05	4.57	19.78	2.45	23.27	2.8
10	1	low	36.08	6.12			33.05	4.31	20.1	3.01	24.48	3.06
10	1	low	36.14	5.71			34.35	5.57	19.61	3.15	23.61	2.55
10	1	low	40.94	7.22			31.1	5.1	20.67	2.55	25.77	3.2
10	1	low	38.33	8.64			31.42	3.99	20.42	3.42	23.4	2.83
10	1	low	40.05	6.37			31.09	4.89	19	2.85	26.2	3.27
10	1	low	34.19	8.09			33.3	4.64	20.29	2.81	25.76	3.22
2	1	middle					31.67	4.16
2	1	middle					27.2	4.16
2	1	middle					30.44	3.59
2	1	middle					31.28	5.95
2	1	middle					29.59	4.55
2	1	middle					33.48	5.47
2	1	middle					29.3	4.62
2	1	middle					31.07	5.21
2	1	middle					31.53	3.86
2	1	middle					30.74	4.28
2	1	middle					35.88	6.22
2	1	middle					34.26	5.16
2	1	middle					37.77	6.38
2	1	middle					35.13	5.21
2	1	middle					34.04	5.47
2	1	middle					32.62	5.05
2	1	middle					29.34	4.08
2	1	middle					33.98	4.39
2	1	middle					36.76	5.33
2	1	middle					36.42	5.52
2	1	middle					37.09	5.07
2	1	middle					38.92	5.95
2	1	middle					34.01	5.42
2	1	middle					37.32	5.3
2	1	middle					36.68	5.46
2	1	middle					34.48	4.72
2	1	middle					34.87	4.93
2	1	middle					34.6	5.29
2	1	middle					32.98	4.32
2	1	middle					31.19	4.94
3	1	middle							19.78	2.65			53.1	5.31
3	1	middle							19.76	2.28			43.47	4.1
3	1	middle							21.67	2.54			50.37	6.46
3	1	middle							22.02	2.1			52.73	3.75
3	1	middle							18.25	2.34			59.62	4.25
3	1	middle							18.99	2.84			49.75	4.5
3	1	middle							17.4	2.68			46.38	4.82
3	1	middle							21.13	2.18			52.85	6.55
3	1	middle							21.03	2.09			47.26	5.72
3	1	middle							19.96	2.09			50.45	5.73
3	1	middle							20.45	3.75			47.13	5.32
3	1	middle							23.37	3.57			47.62	4.79
3	1	middle							19.94	2.88			52.65	5.43
3	1	middle							19.36	3.99			45.64	5.35
3	1	middle							20.97	3.09			45.54	4.26
3	1	middle							20.39	3.48			48.02	3.69
3	1	middle							19.74	3.39			47.88	4.09
3	1	middle							19.64	2.82			45.97	3.91
3	1	middle							19.33	2.48			44.97	4.19
3	1	middle							17.57	2.71			56.96	4.96
3	1	middle							17.86	2.26			53.45	4.35
3	1	middle							19.59	2.99			51.96	4.02
3	1	middle							18.21	1.76			56.1	4.79
3	1	middle							15.67	2.23			45.86	4.14
3	1	middle							17.57	2.21			44.85	6.39
3	1	middle							18.78	2.16			49.05	5.12
3	1	middle							17.73	2.18			55.13	4.46
3	1	middle							18.45	2.23			46.28	6.18
3	1	middle							20.56	3.31			43.34	6.3
3	1	middle							24.52	3.36			49.76	6.53
4	1	middle
4	1	middle
4	1	middle
4	1	middle
4	1	middle
4	1	middle
4	1	middle
4	1	middle
4	1	middle
4	1	middle
4	1	middle
4	1	middle
4	1	middle
4	1	middle
4	1	middle
4	1	middle
4	1	middle
4	1	middle
4	1	middle
4	1	middle
4	1	middle
4	1	middle
4	1	middle
4	1	middle
4	1	middle
4	1	middle
4	1	middle
4	1	middle
4	1	middle
4	1	middle
5	1	middle			76.73	10.09	39.61	6.04	26.57	4.15			60.66	7.55
5	1	middle			78.27	10.36	39.47	7.4	24.75	3.71			57.63	7.33
5	1	middle			86.53	12.29	45.39	8.82	25.5	4.15			60.33	7.18
5	1	middle			74.69	12.73	47.67	7.31	24.41	4.07			61.06	6.9
5	1	middle			79.93	11.4	40.91	6.56	26.95	4.36			61.37	7
5	1	middle			75	14.44	40.48	6.53	24.54	4.05			60.89	5.67
5	1	middle			70.38	9.3	49.26	6.23	23.61	3.97			64.08	5.12
5	1	middle			77.08	11.25	39.58	4.84	25.3	4.62			65.02	5.85
5	1	middle			72.47	11.71	38.76	5.17	24.44	4.69			54.63	6.54
5	1	middle			70.3	7.82	53.65	8.31	26.18	4.01			57.12	4.67
5	1	middle			76.68	12.84	36.74	5.62	25.2	4.54			56.88	4.8
5	1	middle			87.42	10.61	43.07	5.94	25	5.07			59.74	5.65
5	1	middle			73.35	10.99	36.63	5.51	23.44	4.95			52.08	6.06
5	1	middle			69.82	10.44	43.48	5.77	26.29	4.57			60.72	5.44
5	1	middle			77.87	12.16	44.18	6.23	25.01	3.97			56.58	5.78
5	1	middle			76.68	13.39	49.25	6.4	25.76	3.71			62.75	5.09
5	1	middle			77.9	12.76	48.03	6.25	27.26	4.07			59	5.03
5	1	middle			78.92	14.14	47.61	6.3	28.41	4.53			55.61	5.75
5	1	middle			92.22	12.54	36.95	6.01	25.01	2.44			58.88	4.84
5	1	middle			77.85	14.6	38.28	5.69	25.52	4.05			58.47	6.45
5	1	middle			78.33	15.11	41.51	7.2	22.66	3.77			60.48	7.37
5	1	middle			84.58	14.32	48.78	8.54	24.55	3.56			54.03	7.63
5	1	middle			76.29	14.62	49.23	6.51	22.15	3.56			58.2	8.01
5	1	middle			80.65	15.81	37.19	6.23	24.4	3.96			58.43	6.99
5	1	middle			80.75	15.37	38.13	6.56	26.52	4.06			58.36	7.6
5	1	middle			78.6	10.48	45.8	6.67	23.56	3.21			57.86	7.95
5	1	middle			79.44	12.25	42.36	6.52	26.33	3.71			59.71	6.67
5	1	middle			73.05	16.56	41.79	7.82	28	4.71			51.97	5.53
5	1	middle			86.83	16.16	49.6	8.75	25.52	4.3			61.57	6.46
5	1	middle			82.29	13.53	42.38	7.67	25.11	3.93			59.38	5.62
6	1	middle			65.56	17.04	39.87	8.92	31.55	5.69	22.73	3.56
6	1	middle			67.37	15.72	42.06	7.64	22.57	5.05	23.52	3.44
6	1	middle			68.08	14.67	33.03	7.2	28.04	5.18	21.98	3.04
6	1	middle			62.59	16.59	36.45	6.06	26.76	5.33	20.77	3.2
6	1	middle			62.82	14.67	34.99	6.94	19.19	3.34	22.16	3.39
6	1	middle			69.39	13.19	41.53	6.91	21.32	3.26	21.07	2.66
6	1	middle			63.67	14.32	31.42	5.84	22.89	3.12	24.42	2.95
6	1	middle			68.86	13.75	37.24	5.66	23.52	2.93	20.99	2.99
6	1	middle			62.65	15.51	35.71	6.5	23.38	3.87	23.38	2.65
6	1	middle			69.23	13.22	37.64	6.03	26.32	4.56	20.48	3.34
6	1	middle			65.88	13.66	41.19	6.4	26.66	4.19	21.1	3.11
6	1	middle			66.17	14.04	36.77	5.86	24.32	3.45	23.78	3.44
6	1	middle			68.04	13.39	44.17	6.5	23.34	3.2	22.96	3.14
6	1	middle			65.55	13.85	35.34	5.64	22.44	3.44	24.88	3.14
6	1	middle			63.88	13.46	36.3	4.95	29.7	4.67	20.67	3.11
6	1	middle			67.44	13.38	38.36	6.85	29.44	5.18	22.57	3.17
6	1	middle			65.02	13.59	35.72	6.12	34.02	4.56	25.59	2.58
6	1	middle			61.85	12.28	36.39	6.77	19.06	2.39	22.58	2.94
6	1	middle			64.28	12.75	38.54	6.38	22.41	3.78	24.43	3.53
6	1	middle			65.44	12.23	37.36	6.3	31.86	5.4	22.24	3.33
6	1	middle			65.38	12.18	41.23	7.58	22.49	3.51	24.08	2.9
6	1	middle			67.37	11.27	43.56	7.17	25.24	4.26	25.22	2.95
6	1	middle			62.66	11.63	34.99	7.84	20.13	3.49	21.5	2.44
6	1	middle			63.46	12.96	38.56	5.94	22.73	2.66	21.94	2.94
6	1	middle			58.71	12.73	38.99	7.75	20.13	3.46	22.22	3.83
6	1	middle			63.58	12.02	41.65	8.04	22.73	2.66	23.16	3.05
6	1	middle			60.12	11.86	37.47	6.1	20.57	3.56	22.43	2.92
6	1	middle			56.69	13.34	39.36	7.66	21.75	3.36	23.49	2.1
6	1	middle			64.6	10.9	34.03	7.22	25.41	4.13	21.48	3.44
6	1	middle			60.71	12.09	37.8	6.88	20.84	4	21.08	2.74
7	1	middle			62.63	10.94							45.22	4.61
7	1	middle			61.97	8.45							43.94	4.62
7	1	middle			59.91	7.69							42.96	4.65
7	1	middle			61.07	10.54							53.35	4.74
7	1	middle			64.85	8.5							50.11	4.16
7	1	middle			59.11	9.41							43.95	4.33
7	1	middle			70.73	7.53							49.13	4.31
7	1	middle			63.77	8.76							46.71	4.72
7	1	middle			61.82	9.61							54.78	5.2
7	1	middle			62.74	9.95							43.75	6.4
7	1	middle			68.03	10							48.77	5.76
7	1	middle			62.9	7.08							50.37	6.3
7	1	middle			62.74	8.5							51.32	4.71
7	1	middle			63.11	13.18							50.73	5.36
7	1	middle			68.26	8.45							46	5.88
7	1	middle			58.77	9.45							54.06	5.8
7	1	middle			67.15	10.5							52.51	4.55
7	1	middle			59.68	8.96							43.38	5.7
7	1	middle			63.11	12.55							50.6	5.17
7	1	middle			61.74	10.34							49.83	4.8
7	1	middle			62.3	10.96							53.78	5.07
7	1	middle			63.02	10.63							43.3	5.16
7	1	middle			72.67	7.65							40.28	4.31
7	1	middle			60.08	8.65							41.42	4.57
7	1	middle			59.51	8.02							43.52	4.91
7	1	middle			62.57	9.32							47.93	4.58
7	1	middle			58.87	10.73							47.96	4.72
7	1	middle			65.66	9.67							46.27	4.75
7	1	middle			62.02	9.46							48.98	4.64
7	1	middle			61.55	9.13							44.32	4.91
8	1	middle
8	1	middle
8	1	middle
8	1	middle
8	1	middle
8	1	middle
8	1	middle
8	1	middle
8	1	middle
8	1	middle
8	1	middle
8	1	middle
8	1	middle
8	1	middle
8	1	middle
8	1	middle
8	1	middle
8	1	middle
8	1	middle
8	1	middle
8	1	middle
8	1	middle
8	1	middle
8	1	middle
8	1	middle
8	1	middle
8	1	middle
8	1	middle
8	1	middle
8	1	middle
9	1	middle					37.12	6.48	26.58	3.42	30.73	2.74	61.07	6.29
9	1	middle					52.79	7.27	29.48	4.12	30.6	2.93	62.77	7
9	1	middle					43.96	5.6	24.58	3.05	30.63	3.54	62.02	5.79
9	1	middle					38.94	5.49	26.97	3.57	30.85	2.79	57.03	5.95
9	1	middle					48.46	5.85	24.21	3.05	26.77	2.65	72.38	6.6
9	1	middle					39.22	5.08	25.53	3.56	29.19	3.59	63.57	6.43
9	1	middle					40.09	5.97	28.86	3.25	30.62	3.96	61.43	6.67
9	1	middle					43.37	5.24	26.13	3.66	28.33	4.6	62.63	6.29
9	1	middle					41.77	5.98	27.05	3.84	29.72	3.2	62.06	5.8
9	1	middle					46.64	6.35	25.47	4.11	34.03	4.35	66.47	5.97
9	1	middle					41.98	5.85	25.4	3.87	25.71	3.51	60.65	5.02
9	1	middle					41.57	5.19	30.18	3.51	32.14	2.65	62.28	6.09
9	1	middle					39.44	7.64	25.86	4.11	29.64	3.55	65.72	5.18
9	1	middle					38.95	4.77	25.5	3.56	31.4	3.04	63.16	5.2
9	1	middle					38.04	6.69	24.8	3.33	29.21	3.65	62.58	5.93
9	1	middle					43.5	7.46	25.4	3.44	33.38	3.6	66.07	5.42
9	1	middle					47.6	8.17	27.35	4.01	29.56	3.63	66.5	5.69
9	1	middle					37.86	6.87	29.09	3.96	28.82	3.8	62.38	7.21
9	1	middle					39.64	5.93	27.35	4.01	28.76	3.44	65.27	6.24
9	1	middle					45.21	7.65	27.09	3.96	27.18	3.65	61.48	6.4
9	1	middle					31.53	7.17	22.8	3.26	31.82	3.68	62.16	6.54
9	1	middle					34.97	6.72	29.65	4.41	31.86	4.25	63.95	5.89
9	1	middle					35.69	6.78	27.27	3.71	29.44	4.12	64.69	5.48
9	1	middle					37.54	5.47	27.97	3.89	30.86	4.26	58.77	7.12
9	1	middle					40.88	6.57	28.92	3.83	28.78	3.78	61.05	6.35
9	1	middle					36.03	5.4	27.74	3.34	30.66	3.6	60.3	8.06
9	1	middle					43.01	6.63	27.18	3.77	31.71	3.86	62.66	8.61
9	1	middle					43.44	6	25.32	4.26	31.03	2.59	65.18	8.51
9	1	middle					43.15	6.23	25.34	3.51	27.03	3.39	64.61	7.8
9	1	middle					45.79	7.37	26.5	2.83	32.22	3.83	63.14	8.46
10	1	middle					32.87	4.75	21.42	3.27	25.92	2.48
10	1	middle					39.64	4.9	23.33	3.35	24.6	2.64
10	1	middle					34.49	4.27	34.04	2.59	26.25	2.74
10	1	middle					35.76	4.75	20.19	2.66	23	2.52
10	1	middle					35.6	5.17	22.13	2.59	23.29	2.56
10	1	middle					39.81	5.53	20.61	2.83	23.36	3.5
10	1	middle					44.16	5.46	20.95	2.95	26.1	2.85
10	1	middle					35.79	4.78	20.34	3.02	26.04	2.08
10	1	middle					38.35	4.37	21.75	2.36	25.65	2.58
10	1	middle					39.9	4.92	22.67	2.69	22.96	2.38
10	1	middle					36.1	4.61	21.81	2.95	24.91	2.69
10	1	middle					37.74	4.72	20.41	2.65	25.51	2.82
10	1	middle					39.07	4.69	24.25	3.22	24.73	2.41
10	1	middle					39.27	4.9	19.6	2.81	24.34	2.36
10	1	middle					41.31	4.49	20.36	2.83	25.22	3.01
10	1	middle					37.41	5.46	20.23	2.4	23.05	2.14
10	1	middle					38.27	4.62	22.94	3.46	26.16	2.76
10	1	middle					37.78	5.91	20.95	2.81	24.19	3.09
10	1	middle					37.03	6.18	20.83	2.55	21.85	2.98
10	1	middle					35.59	5.34	19.76	2.48	22.32	2.48
10	1	middle					35.88	4.51	23.1	2.98	22.27	2.41
10	1	middle					35.78	4.08	22.86	3.62	23.69	2.69
10	1	middle					28.3	3.79	22.48	2.65	24.12	2.45
10	1	middle					36.17	4.76	24.8	3.39	24.24	2.79
10	1	middle					35.24	4.91	22.37	3.21	23.96	2.49
10	1	middle					36.9	4.56	24.38	3.35	23.17	2.69
10	1	middle					35.64	4.67	20.24	3.04	25.04	2.87
10	1	middle					36.88	4.84	21.97	2.98	23.89	2.95
10	1	middle					34.65	4.28	19.63	3.07	23.7	2.64
10	1	middle					34.78	4.71	20.1	2.06	22.15	2.79
2	1	high					30.32	4.41
2	1	high					32.09	4.18
2	1	high					30.69	4
2	1	high					29.82	3.86
2	1	high					32.61	4.94
2	1	high					32.43	5.11
2	1	high					30.9	4.14
2	1	high					32.56	4.34
2	1	high					33.04	3.76
2	1	high					35.67	4
2	1	high					31.76	4.08
2	1	high					31.52	4.29
2	1	high					32.8	4.97
2	1	high					31.71	5.36
2	1	high					32.53	4.46
2	1	high					29.85	3.59
2	1	high					31.58	3.5
2	1	high					30.89	3.47
2	1	high					31.13	4.05
2	1	high					27.94	4.28
2	1	high					28.91	3.93
2	1	high					30.62	4.95
2	1	high					30.71	4.99
2	1	high					34.67	4.61
2	1	high					30.32	4.32
2	1	high					33.17	5.11
2	1	high					31.97	4.35
2	1	high					31.16	5.24
2	1	high					31.58	4.34
2	1	high					35.93	5.49
3	1	high			62.29	10.13			20.59	3.17	21.66	2.65
3	1	high			59.15	9.99			19.79	3.6	21.59	2.75
3	1	high			62.02	9.25			24.47	3.72	21.73	3.28
3	1	high			64.91	10.76			19.76	3.22	20.35	3.04
3	1	high			59.05	10.55			19.55	3.22	20.25	3.58
3	1	high			61.08	8.7			22.24	3.11	21.67	4.12
3	1	high			64.17	9.86			19.84	3.39	20.7	2.75
3	1	high			60.67	9.9			19.14	3.02	22.37	3.76
3	1	high			58.86	10.07			22.13	2.42	22.24	4.52
3	1	high			60.73	10.88			19.68	2.62	21.2	3.85
3	1	high			59.16	10.37			17.87	1.9	21.33	3.85
3	1	high			60.67	9.39			22.26	3.33	22.27	3.49
3	1	high			61.2	10.1			21.73	2.89	21.85	3.96
3	1	high			61.52	9.75			22.02	2.38	20.16	2.73
3	1	high			61.19	9.66			32.03	4.43	20.79	2.5
3	1	high			66.56	9.52			20.18	3.34	20.48	3.04
3	1	high			63.63	10.47			22.71	3.49	21.93	2.68
3	1	high			59.78	10.46			18.91	3.38	21.76	3.05
3	1	high			62.78	8.69			22.35	2.92	20.1	2.56
3	1	high			62.27	9.92			20.83	2.56	23.57	2.99
3	1	high			63.91	9.4			19.71	2.89	23.78	2.15
3	1	high			60.71	9.64			21.53	2.73	22.54	3.43
3	1	high			61	9.29			31.42	3.35	22.59	2.61
3	1	high			63.67	9.95			29.86	3.62	23.28	2.79
3	1	high			60.4	10.68			31.63	4.04	22.31	2.5
3	1	high			62.34	8.9			32.65	3.34	22.86	2.63
3	1	high			57.1	10.24			33.17	4.73	21.01	2.48
3	1	high			64.98	9.48			29.68	4.12	20.76	2.43
3	1	high			59.26	9.29			22.89	2.87	20.36	2.61
3	1	high			66.55	9.22			32.31	4.14	19.54	2.65
4	1	high							29.14	4.03
4	1	high							31.2	3.94
4	1	high							26.71	4.28
4	1	high							25.6	3.64
4	1	high							20.94	3.33
4	1	high							25.75	2.4
4	1	high							23.14	3.4
4	1	high							25.5	4.52
4	1	high							27.41	3.42
4	1	high							23.25	3.25
4	1	high							24.3	3.02
4	1	high							21.81	2.69
4	1	high							26.76	3.12
4	1	high							27.54	3.6
4	1	high							29.61	2.94
4	1	high							26.59	2.75
4	1	high							24.32	2.92
4	1	high							26.55	3.5
4	1	high							28.15	3.77
4	1	high							25.38	3.34
4	1	high							29.59	4.38
4	1	high							26.37	3.47
4	1	high							26.88	3.18
4	1	high							20.58	3.79
4	1	high							25.57	4.46
4	1	high							23.06	3.24
4	1	high							24.61	3.89
4	1	high							23.52	3.73
4	1	high							25.65	3.43
4	1	high							25.89	3.55
5	1	high			76.12	13	37.55	5.64	27.19	4.46
5	1	high			70.61	15.39	37.78	7.77	28.65	4.27
5	1	high			71.24	15.82	42.62	7.42	27.35	3.33
5	1	high			72.55	14.47	37.03	6.72	34.85	5.81
5	1	high			76.57	14.59	40.25	6.7	35.62	5.56
5	1	high			76.66	14.67	43.2	7.72	25.18	3.75
5	1	high			74.12	14.06	44.87	6.54	41.67	5.58
5	1	high			83.36	13.04	39.73	6.42	37.45	4.96
5	1	high			73.26	12.48	42.59	6.7	25.56	2.93
5	1	high			76.7	14.01	43.32	7.31	36	4.22
5	1	high			75.82	14.17	40.66	6.14	35.18	4.41
5	1	high			66.33	13.78	40.4	5.47	21.51	3.77
5	1	high			69.84	14.24	41.43	6.31	27.06	3.67
5	1	high			75.34	10.42	37.98	6.66	26.47	4.07
5	1	high			74.68	11.24	42.87	6.43	27.09	3.68
5	1	high			70.37	11.27	44.72	6.3	38.69	5.19
5	1	high			74.98	11.52	46.1	8	26.16	4.02
5	1	high			78.8	9.15	40.95	6.96	28.02	3.36
5	1	high			78.89	10.63	38.46	5.66	45.71	5.94
5	1	high			76.7	11.02	41.84	5.91	24.68	3.83
5	1	high			83.28	11.47	49.11	6.38	24.41	3.14
5	1	high			79.54	14.4	43.82	6.9	31.44	4.61
5	1	high			75.4	15.47	40.9	4.92	38.23	5.15
5	1	high			81.4	12.93	40.33	7.36	29.76	2.74
5	1	high			72.16	13.64	41.43	5.93	23.48	3.55
5	1	high			81.19	12.96	41.52	6.09	24.75	4.09
5	1	high			81.35	12.73	46.23	6.18	24.59	3.36
5	1	high			74.69	14.44	40.76	6.45	36.53	5.56
5	1	high			74.7	14.61	47.09	5.13	21.57	3.64
5	1	high			61.89	11.7	42.11	6.48	24.2	3.83
6	1	high			68.64	11.95	33.25	5.49
6	1	high			62.67	12.74	40.4	6.65
6	1	high			61.29	12.27	34.96	6.84
6	1	high			66.21	12.64	36.52	5.4
6	1	high			73.4	13.81	37.09	5.5
6	1	high			70.46	16.38	40.48	5.73
6	1	high			69.14	17.46	32.94	6.37
6	1	high			67.32	17.51	41.28	5.9
6	1	high			67.35	14.82	35.46	6.23
6	1	high			66.94	11.6	41.57	6.89
6	1	high			74.03	14.17	38.64	6.72
6	1	high			55.8	11.44	36.94	6.93
6	1	high			64.15	11.42	43.73	6.54
6	1	high			64.05	11.35	34.06	5
6	1	high			62.92	11.28	42.36	6.8
6	1	high			52.28	11.87	37.24	7.62
6	1	high			61.39	11.05	37.42	5.84
6	1	high			62.29	10.31	40.6	6.55
6	1	high			57.42	12.18	34.03	8.02
6	1	high			61.79	10.42	36.25	6.89
6	1	high			69.3	11.82	43.34	6.76
6	1	high			54.04	12.24	39.82	6.11
6	1	high			60.39	10.57	37.39	5.18
6	1	high			60.68	12.2	36.6	5.52
6	1	high			63.38	10.65	37.86	6.72
6	1	high			55.42	11.23	40.58	6.38
6	1	high			62.18	9.85	37.96	6.97
6	1	high			68.51	11.36	39.14	6.27
6	1	high			58.66	10.2	36.62	5.84
6	1	high			64.84	11.06
7	1	high					30.68	4.94	20.12	2.51
7	1	high					30.26	4.32	28.32	3.27
7	1	high					26.53	4.55	17.45	2.7
7	1	high					26.76	4.48	27.76	4.02
7	1	high					27.45	4.12	23.12	3.01
7	1	high					27.13	3.71	19.88	3.25
7	1	high					31.2	4.7	27.57	3.92
7	1	high					25.37	3.81	27.96	3.82
7	1	high					29.44	4.62	19	2.81
7	1	high					26.82	4.23	20.68	3.15
7	1	high					33.25	4.45	19.83	2.75
7	1	high					28.47	4.17	15.82	2.44
7	1	high					29.96	4.64	18.48	2.42
7	1	high					27.6	3.9	20.37	2.53
7	1	high					28.04	4.09	22.83	3.53
7	1	high					30.48	3.86	26.57	3.35
7	1	high					27.64	3.34	18.57	2.58
7	1	high					29.12	4.46	28.31	3.27
7	1	high					25.83	3.27	30.97	3.4
7	1	high					27.9	4.51	16.72	2.57
7	1	high					27.93	4.27	19.19	2.48
7	1	high					31.71	5.3	26.21	4.01
7	1	high					33.35	5.11	29.03	3.43
7	1	high					28.17	4.38	30.39	4
7	1	high					29.61	5.01	18.46	2.54
7	1	high					32.63	6.23	32.53	4.18
7	1	high					31.84	4.46	17.9	2.68
7	1	high					28.09	4.16	33.14	4.57
7	1	high					30.34	3.88	19.43	3.18
7	1	high					27.77	3.4	18.36	3.25
8	1	high					44.98	6.35
8	1	high					46.46	5.93
8	1	high					44.49	6.23
8	1	high					48.11	5.97
8	1	high					49.51	5.69
8	1	high					49.9	5.85
8	1	high					46.74	6.24
8	1	high					47.15	5.04
8	1	high					54.87	7.27
8	1	high					47.55	5.96
8	1	high					52.17	6.12
8	1	high					46.41	5.99
8	1	high					46.71	6.53
8	1	high					51.57	5.57
8	1	high					47.64	5.78
8	1	high					44.88	6.89
8	1	high					49.61	5.65
8	1	high					43.77	6.67
8	1	high					44.47	5.32
8	1	high					53.32	6.46
8	1	high					47.55	6.37
8	1	high					48.98	5.82
8	1	high					44.65	5.2
8	1	high					45.61	6.07
8	1	high					50.84	7.35
8	1	high					52.45	6.13
8	1	high					56.94	8.34
8	1	high					35.71	5.98
8	1	high					44	6.67
8	1	high					43.73	7.07
9	1	high			93.58	14.39	42.77	4.57	40.53	4.11
9	1	high			78.63	13.04	45.56	5.73	41.73	5.32
9	1	high			90.47	14.42	45.78	5.83	36.32	4.07
9	1	high			71.19	13.66	50	7.3	26.93	4
9	1	high			78.19	14.51	39.41	4.95	38.18	4.77
9	1	high			80.81	16.26	44.31	7.35	29.08	2.95
9	1	high			84.5	16.7	39.98	5.51	35.85	4.63
9	1	high			84.37	16.5	43.46	6.14	23.89	3.65
9	1	high			81.91	16.71	45.7	6.87	27.96	3.83
9	1	high			79.16	13.76	43.39	6.46	37.67	4.54
9	1	high			80.71	11.98	43.88	5.84	41.42	5.51
9	1	high			87.03	13.19	43.03	5.17	40.68	5.62
9	1	high			77.11	15	47.11	6.25	29.95	3.97
9	1	high			82.09	15.25	36.89	6.23	33.39	4.75
9	1	high			81.64	13.67	28.44	6.45	29.81	4.02
9	1	high			78.85	16.82	46.52	6.78	35.88	5.65
9	1	high			76.05	15.21	40.82	6.68	40.73	4.47
9	1	high			73.4	17.02	41.39	6.04	26.73	3.56
9	1	high			71.75	14.08	46.72	7.37	34.17	3.83
9	1	high			76.88	14.02	41.69	6.57	30.56	3.24
9	1	high			83.57	13.95	41.79	5.56	41.87	4.73
9	1	high			70.85	12.45	41.57	4.51	46.25	5
9	1	high			83.15	15.15	41.57	5.32	36.06	4.81
9	1	high			77.28	16.01	40.37	6.14	30.6	4.06
9	1	high			73.66	16.78	41.68	6.35	27.8	4.12
9	1	high			78.55	15.22	38.15	5.47	42.15	4.72
9	1	high			81.84	15.06	40.81	5.5	33.21	4.36
9	1	high			86.02	16.92	41.87	5.42	42.25	4.77
9	1	high			80.25	17.45	45.17	5.85	41.16	5.02
9	1	high			81.52	13.96	43.9	4.92	26.68	3.2
10	1	high			68.73	13.12	36.5	4.34			22.76	2.06
10	1	high			61.7	9.62	31.96	4.64			22.1	2.64
10	1	high			71.98	10.56	35.83	5.06			23.37	2.65
10	1	high			66.52	10.57	34.18	5.13			21.12	2.36
10	1	high			69.83	11.43	32.16	4.7			21.8	2.69
10	1	high			70.39	9.6	34.11	5.57			21.91	2.83
10	1	high			67.32	10.76	31.45	4.6			23.83	2.24
10	1	high			67.35	12	34.27	4.73			22.24	3.03
10	1	high			62.53	9.01	31.35	4.27			21.36	3.22
10	1	high			60.57	10.4	33.2	4.57			22.13	3.06
10	1	high			70.44	11.19	33.16	4.92			21.7	2.89
10	1	high			69.85	10.97	36.37	4.73			23.52	2.89
10	1	high			63.4	9.39	32.71	4.9			21.7	2.59
10	1	high			69.58	11.41	34.03	5.19			21.7	2.53
10	1	high			66.24	11.28	29.7	4.61			23.33	2.87
10	1	high			67.16	10.79	39.7	5.85			21.06	2.28
10	1	high			64.07	8.72	35.08	4.15			22.6	2.98
10	1	high			67.83	9.36	31.38	5.66			25.62	2.76
10	1	high			71.49	10.58	34.41	5.16			22.81	2.75
10	1	high			66.74	9.78	34.19	4.8			24.18	2.5
10	1	high			69.3	9.72	34.9	5.11			23.78	2.4
10	1	high			68.75	10.19	36.04	4.88			23.78	3.15
10	1	high			62.93	9.52	31.89	4.53			22.28	2.36
10	1	high			70.59	12.88	34.13	3.93			23.68	3.04
10	1	high			66.94	11.34	31.84	4.73			22.94	2.77
10	1	high			72.46	12.27	32.8	4.57			22.54	2.41
10	1	high			71.64	12.81	35.88	4.79			19.89	2.65
10	1	high			65.47	11.59	35.47	4.42			20.59	2.39
10	1	high			63.09	11.35	32.18	4.44			21.84	2.63
10	1	high			68.76	10.4	34.99	4.71			24.86	2.33
1	2	low					34.59	4.47			21	3.24
1	2	low					35.43	5.17			21.89	2.61
1	2	low					36.7	4.95			22.03	2.88
1	2	low					39.04	5.11			22.17	2.97
1	2	low					35.1	4.75			18.27	2.57
1	2	low					36.28	5.49			23.56	3.14
1	2	low					37.83	4.97			24.4	3.16
1	2	low					36.5	4.57			20.84	3.25
1	2	low					35.71	4.85			24.31	3.01
1	2	low					37.28	5.15			22.88	3.61
1	2	low					34.76	4.75			23.76	3.7
1	2	low					37.26	4.84			22.18	2.97
1	2	low					34.84	4.45			21.31	3.01
1	2	low					41.01	4.71			22.86	3.46
1	2	low					32.1	4.75			21.42	3.32
1	2	low					34.35	4.97			22.2	3.06
1	2	low					37.2	4.68			24.12	3.25
1	2	low					35.43	4.35			23.01	2.75
1	2	low					32.42	4.53			22.28	3.22
1	2	low					33.5	4.27			24.68	3.5
1	2	low					31.04	4.19			22.68	2.89
1	2	low					34.52	5.32			22.74	3.12
1	2	low					33.8	4.75			22.27	2.51
1	2	low					33.78	4.8			20.4	2.68
1	2	low					34.53	5.01			23.51	3.4
1	2	low					32.29	4.12			23.84	2.88
1	2	low					32.46	5.05			19.99	2.32
1	2	low					31.36	4.19			23.23	3.01
1	2	low					30.45	4.62			22.79	2.84
1	2	low					34.86	5.24			22.24	3.16
1	2	middle					37.72	5.64
1	2	middle					37.79	4.84			21.24	3.42
1	2	middle					36.35	4.22			23.71	2.55
1	2	middle					39.42	4.85			22.09	2.66
1	2	middle					33.53	4.62
1	2	middle					36.76	4.61			22.97	3.07
1	2	middle					34.77	4.46			22.1	3.09
1	2	middle					32.49	4.57			23.53	3.01
1	2	middle					41.31	5.39			23.33	3.27
1	2	middle					36.09	4.6			24.39	3.89
1	2	middle					41.29	5.18			21.3	2.65
1	2	middle					36.6	4.94			21.61	3.24
1	2	middle					38.28	5.2			23.09	2.7
1	2	middle					35.66	4.8			24.59	2.88
1	2	middle					34.01	4.94			23.11	1.96
1	2	middle					39.91	4.53			19.8	3.71
1	2	middle					37.92	4.95			21.64	4.09
1	2	middle					35.86	4.9			20.18	2.97
1	2	middle					39.14	4.85			22.51	2.65
1	2	middle					37.94	4.85			18.36	2.38
1	2	middle					33.87	4.55			20.05	2.8
1	2	middle					36.37	4.18			21.78	3.53
1	2	middle					39	4.82			21.63	2.88
1	2	middle					36.88	4.82			20.79	2.76
1	2	middle					36.5	4.32			21.24	2.86
1	2	middle					37.33	4.53			20.81	3.47
1	2	middle					35.59	6			21.5	2.48
1	2	middle					34.42	4.74			21.25	3.14
1	2	middle					36.62	5.56			22.22	1.96
1	2	middle					40.31	5.65			24.29	2.88
1	2	high					39.65	4.93
1	2	high					37.57	4.29
1	2	high					36.18	4.46
1	2	high					37.02	4.46
1	2	high					38.81	5
1	2	high					35.89	4.76
1	2	high					36.63	5.19
1	2	high					38.4	5
1	2	high					35.56	4.73
1	2	high					31.57	4.74
1	2	high					32.52	4.72
1	2	high					37.36	5.04
1	2	high					35.27	4.74
1	2	high					38.85	5.27
1	2	high					33.07	5.05
1	2	high					34.82	6.09
1	2	high					33.22	6.24
1	2	high					32.72	5.03
1	2	high					30.62	5.82
1	2	high					39.76	6.19
1	2	high					41.97	6.53
1	2	high					34.92	5.14
1	2	high					34.31	4.77
1	2	high					33.03	4.57
1	2	high					34.8	5.52
1	2	high					35.73	5.76
1	2	high					32.23	5.15
1	2	high					35.42	4.65
1	2	high					36.97	4.39
1	2	high					35.15	5.16
2	2	low	36.57	6.71
2	2	low	34.47	5.5
2	2	low	36.3	6.21
2	2	low	32.14	6
2	2	low	35.8	4.94
2	2	low	33.14	4.75
2	2	low	33.35	5.15
2	2	low	34.32	6.43
2	2	low	37.61	5.85
2	2	low	41.14	6.01
2	2	low	34.29	5.51
2	2	low	35.04	5.49
2	2	low	32.8	6.65
2	2	low	31.74	5.89
2	2	low	37.37	6.15
2	2	low	37.37	6.01
2	2	low	31.5	5.21
2	2	low	37.51	5.97
2	2	low	37.69	5.43
2	2	low	34.24	6.01
2	2	low	36.28	4.65
2	2	low	38.42	6.12
2	2	low	33.31	5.03
2	2	low	32.41	5.76
2	2	low	32.25	5.52
2	2	low	35.14	6.11
2	2	low	32.94	5.59
2	2	low	32.65	5.88
2	2	low	37.32	5.49
2	2	low	34.42	5.47
3	2	low									18.3	2.94
3	2	low									21.45	2.5
3	2	low									20.07	2.46
3	2	low									19.1	2.99
3	2	low									19.26	2.33
3	2	low									18.97	2.85
3	2	low									19.88	2.84
3	2	low									19.38	2.79
3	2	low									20.1	3.17
3	2	low									18.69	2.18
3	2	low									19.41	3.47
3	2	low									19.47	2.71
3	2	low									18.82	2.61
3	2	low									20.34	2.46
3	2	low									21.11	3.48
3	2	low									19.76	3
3	2	low									19.19	2.23
3	2	low									19.79	2.51
3	2	low									19.59	1.93
3	2	low									19.28	2.73
3	2	low									19.34	2.71
3	2	low									18.32	3.41
3	2	low									19.38	2.54
3	2	low									19.29	3.81
3	2	low									21.18	3.47
3	2	low									20.69	3.34
3	2	low									21.05	2.5
3	2	low									19.26	3.13
3	2	low									20.12	2.6
3	2	low									17.99	2.61
4	2	low	34.35	6.61
4	2	low	37.57	5.91
4	2	low	36.91	5.97
4	2	low	30.65	6.56
4	2	low	34.52	5.8
4	2	low	38.61	5.78
4	2	low	39.88	6.46
4	2	low	36.98	6.28
4	2	low	37.01	4.83
4	2	low	36.85	5.03
4	2	low	39.08	6.26
4	2	low	36.42	5.88
4	2	low	34.82	6.37
4	2	low	37.12	5.88
4	2	low	36.7	7.3
4	2	low	29.31	5.91
4	2	low	36.46	7.16
4	2	low	34.77	5.09
4	2	low	39.97	6.28
4	2	low	32.19	5.26
4	2	low	35.62	6.18
4	2	low	34.75	5.33
4	2	low	35.39	5.02
4	2	low	35.97	6.52
4	2	low	32.67	5.21
4	2	low	34.22	5.63
4	2	low	40.34	6.31
4	2	low	36.86	5.01
4	2	low	37.23	5.43
4	2	low	36.55	6.01
5	2	low	59.2	10.01			39.55	5.93
5	2	low	54.44	9.88			35.64	5.78
5	2	low	49.71	10.89			45.3	8.79
5	2	low	50.63	11.34			33.21	6.99
5	2	low	57.65	11.13			29.8	6.06
5	2	low	45.69	8.14			37.74	6.27
5	2	low	56.16	11.13			34.66	7.45
5	2	low	45.59	11.24			36.15	6.23
5	2	low	49.7	8.03			36.96	6.01
5	2	low	50.41	8.38			34.25	5.86
5	2	low	47.29	7.49			39	7.52
5	2	low	46.25	8.22			39.14	4.77
5	2	low	49.07	8.3			32.13	5.25
5	2	low	47.79	7.45			38.92	4.73
5	2	low	46.83	7.76			39.36	5.49
5	2	low	50.78	7.72			32.67	5.18
5	2	low	49.59	7.75			33.95	6.64
5	2	low	50.55	7.35			31.21	4.6
5	2	low	50.87	8.49			42.85	5.04
5	2	low	54.43	8.55			33.4	6.14
5	2	low	46.98	8.35			38.67	5.66
5	2	low	41.99	7.2			40	5.19
5	2	low	50.04	9.56			35.9	3.6
5	2	low	49.11	8.43			35.96	4.71
5	2	low	43.28	7.17			35.03	5.11
5	2	low	45.06	7.43			32.94	7.67
5	2	low	49.06	7.63			35.53	4.83
5	2	low	41.86	8			37.37	6.34
5	2	low	53.04	7.76			34.87	6.91
5	2	low	46.38	11.46			28.11	5.59
6	2	low									20.29	3.92
6	2	low									18.27	3.87
6	2	low									18.28	5.02
6	2	low									19.26	4.51
6	2	low									17.94	4.42
6	2	low									19.94	4.17
6	2	low									17.08	4.43
6	2	low									20	4.83
6	2	low									17.37	3.98
6	2	low									20.37	4.05
6	2	low									18.5	4.82
6	2	low									17.35	3.66
6	2	low									18.26	4.35
6	2	low									21	4.44
6	2	low									19.38	3.64
6	2	low									20.08	3.73
6	2	low									19.08	3.31
6	2	low									17.61	3.93
6	2	low									20.19	4.09
6	2	low									21.41	4.4
6	2	low									19.32	4.35
6	2	low									20.6	3.77
6	2	low									19.69	2.52
6	2	low									20.35	3.42
6	2	low									20.56	3.01
6	2	low									19.56	2.92
6	2	low									19.63	3.04
6	2	low									19.29	2.58
6	2	low									18.96	3.24
6	2	low									18.03	2.52
7	2	low											49.79	4.28
7	2	low											41.77	4.74
7	2	low											41.85	4.49
7	2	low											46.15	4.77
7	2	low											42.66	4.4
7	2	low											41.35	4.61
7	2	low											43.75	5.51
7	2	low											45.11	5.97
7	2	low											48.53	4.24
7	2	low											48.82	4.01
7	2	low											47.09	5.98
7	2	low											41.15	4.09
7	2	low											50.14	4.11
7	2	low											43.45	4.01
7	2	low											47.92	5.04
7	2	low											44.41	3.53
7	2	low											42.43	4.9
7	2	low											39.08	5.75
7	2	low											44.24	4.88
7	2	low											44.47	4.95
7	2	low											48.1	3.39
7	2	low											52.96	4.56
7	2	low											45.76	4.42
7	2	low											45.67	4.43
7	2	low											40.63	4.4
7	2	low											43.55	5.02
7	2	low											44.77	3.77
7	2	low											41.58	3.96
7	2	low											42.73	4.59
7	2	low											46.83	3.94
8	2	low	45.97	8.65			39.38	5.78
8	2	low	49.75	8.35			41.77	5.19
8	2	low	46.77	7.08			42.13	4.78
8	2	low	50.98	7.84			43.59	3.96
8	2	low	45.28	6.67			36.14	4.77
8	2	low	47.11	8.71			50.22	4.37
8	2	low	43.79	7.61			37.75	5.65
8	2	low	42.49	7.85			39.85	4.61
8	2	low	47.75	8.14			46.2	4.86
8	2	low	45.21	7.85			45.11	4.89
8	2	low	43.77	7.9			48.57	5.23
8	2	low	48.6	6.64			41.69	4.95
8	2	low	40.97	6.56			32.17	4.33
8	2	low	44.91	6.65			38.52	4.72
8	2	low	47.77	7.67			45.77	4.77
8	2	low	47.27	6.24			40.95	6.67
8	2	low	49.21	7.96			40.27	6.57
8	2	low	48.58	7.03			41.44	5.03
8	2	low	44.93	7.2			37.22	5.48
8	2	low	47.04	7.63			42.84	5.64
8	2	low	48.18	7.3			42.04	4.83
8	2	low	41.07	7.63			39.84	4.12
8	2	low	41.07	8.16			39.14	5.13
8	2	low	44.35	7.03			42.74	5.08
8	2	low	48.37	7.31			37.67	5.6
8	2	low	49.61	7.84			38.96	4.62
8	2	low	46.23	7.15			39.4	5.48
8	2	low	39.48	9.16			42.97	4.15
8	2	low	44.38	7.51			34.11	4.57
8	2	low	47.62	8.72			36.03	4.23
9	2	low	42.01	9.95			34.61	4.78			30.49	3.93
9	2	low	40.62	9.84			34.57	5.34			33.35	3.54
9	2	low	37.81	9.2			39.6	7.35			34.51	3.43
9	2	low	36.26	8.71			37.63	5.98			33.86	4.04
9	2	low	41.33	10.13			35.03	6.14			31.23	3.23
9	2	low	36.83	9.99			37.07	7.35			32.26	3.8
9	2	low	38.47	9.69			42.85	7.02			31.47	3.73
9	2	low	37.19	4.48			39.78	5.93			33.38	3.12
9	2	low	35.6	5.97			33.19	6.13			29.39	4.01
9	2	low	34.93	6.02			35.79	5.77			32.92	4.1
9	2	low	39.05	9.99			37.86	6.01			27.39	2.74
9	2	low	37.57	9.27			33.67	4.91			32.56	3.69
9	2	low	37.06	6.44			32.25	4.97			31	4.29
9	2	low	35.43	9.91			37.58	5.98			31.31	3.86
9	2	low	35.22	8.81			38.33	7.39			31.31	3.64
9	2	low	34.71	6.11			38.1	5.93			33.03	4.09
9	2	low	35.64	5.95			43.84	7.09			30.95	3.89
9	2	low	34.88	6.02			34.11	7.09			30.32	3.54
9	2	low	39.11	6.98			30.04	4.79			32.28	3.8
9	2	low	35.05	5.91			38.21	4.8			30.47	4.04
9	2	low	33.83	5.94			37.47	4.71			32.61	3.53
9	2	low	39.37	7.09			37.93	4.7			30.64	3.67
9	2	low	34.01	5.73			32.07	5.59			32.67	3.45
9	2	low	43.95	7.18			37.91	4.43			27.49	3.52
9	2	low	32.78	4.74			36.78	4.35			30.96	3.15
9	2	low	33.1	6.32			40.91	5.44			28.48	3.41
9	2	low	34.62	6.5			41.08	4.43			28.3	2.86
9	2	low	31.96	5.52			40.66	5.08			31.17	3.15
9	2	low	36.73	6.6			37.87	5.59			27.14	2.85
9	2	low	35.25	6.37			32.46	6.24			32.16	3.31
10	2	low					33.27	4.89	23.35	3.08	25.94	2.2
10	2	low					40.4	6.23	21.53	2.55	26.29	3.05
10	2	low					44.74	6.8	20.98	2.22	28.28	2.86
10	2	low					41.37	6.15	23.72	2.98	28.31	2.52
10	2	low					36.99	5.5	20.85	2.94	25.31	2.67
10	2	low					40.22	5.39	20.9	2.05	27.65	3.17
10	2	low					38.91	5.66	24.83	2.21	27.73	3.05
10	2	low					43.21	5.81	24.68	2.36	26.55	1.9
10	2	low					40.89	5.13	21.25	3.72	25.56	2.38
10	2	low					33.91	5.334	20.97	2.57	26.17	2.54
10	2	low					34.81	3.74	22.27	2.93	26.64	2.58
10	2	low					34.68	4.34	24.22	2.86	24.71	3.15
10	2	low					34.73	3.61	22.39	2.7	24.04	2.08
10	2	low					32.41	5.04	23.63	2.31	25.18	2.67
10	2	low					36.98	4.24	23.48	2.15	25.14	2.86
10	2	low					30.02	4.33	20.46	1.87	26.38	2.52
10	2	low					33.19	4.83	23.59	2.28	24.91	2.69
10	2	low					32.16	4.1	21.5	2.86	23.27	2.97
10	2	low					33.65	4.11	23.49	2.19	24.21	2.62
10	2	low					31.73	4.51	20.98	2.62	24.28	2.75
10	2	low					33.94	4.32	23.26	3.15	22.23	2.27
10	2	low					34.81	3.96	21.21	2.95	22.83	2.83
10	2	low					40.91	5.14	23.28	2.43	25.16	2.65
10	2	low					39.49	4.43	22.68	2.28	25.79	2.94
10	2	low					36.59	5.91	22.82	2.36	25.45	2.91
10	2	low					33.95	3.48	21.69	2.43	25.67	2.73
10	2	low					38.79	4.94	23.82	2.36	26.52	2.15
10	2	low					33.3	4.25	26.43	3.14	25.49	2.83
10	2	low					36.61	3.77	25.48	2.61	26.21	2.22
10	2	low					34.57	3.97	28.1	2.82	27.07	3.04
2	2	middle					28.37	4.91			22.32	3.13
2	2	middle					33.74	5.54			20.94	3.32
2	2	middle					31.13	4.94			19.29	2.16
2	2	middle					30.9	3.64			21.6	3.27
2	2	middle					34.26	4.38			19.93	3.03
2	2	middle					32.36	5.05			19.98	3.46
2	2	middle					35.63	6			20.73	3.49
2	2	middle					29.69	5.27			20	2.26
2	2	middle					29.66	4.12			19.34	2.81
2	2	middle					28.56	4.72			19.46	2.29
2	2	middle					33.54	4.7			19.92	2.48
2	2	middle					32.54	4.18			20.74	2.11
2	2	middle					29.49	3.34			22.21	2.75
2	2	middle					27.93	3.9			19.06	2.65
2	2	middle					30.82	4.41			20.79	2.26
2	2	middle					29.13	3.93			17.17	2.66
2	2	middle					32.1	5.37			18.09	2.09
2	2	middle					32.56	4.31			18.83	2.86
2	2	middle					32.33	4.31			17.97	1.49
2	2	middle					29.75	3.8			18.7	2.26
2	2	middle					28.82	3.93			18.49	2.07
2	2	middle					31.74	4.77			19.97	2.44
2	2	middle					26.36	3.9			17.98	2.86
2	2	middle					31.33	5.14			20.12	2.29
2	2	middle					30.15	5.21			18.19	2.15
2	2	middle					32.94	4.55			20.22	2.8
2	2	middle					31.54	4.28			18.32	2.58
2	2	middle					29.07	3.71			19.81	3.65
2	2	middle					30.79	4.31			20.91	2.29
2	2	middle					32	4.16			19.64	2.79
3	2	middle									21.16	2.35
3	2	middle									19.24	2.46
3	2	middle									18.88	3.43
3	2	middle									19.75	2.17
3	2	middle									19.28	2.75
3	2	middle									20.89	2.88
3	2	middle									19.88	2.94
3	2	middle									18.47	2.26
3	2	middle									20.36	2.61
3	2	middle									20.22	2.57
3	2	middle									18.02	2.62
3	2	middle									21.34	3.03
3	2	middle									21.39	2.75
3	2	middle									19.5	2.42
3	2	middle									18.69	2.69
3	2	middle									20.37	2.63
3	2	middle									19.25	3.61
3	2	middle									20.46	2.51
3	2	middle									19.74	2.6
3	2	middle									19.1	2.94
3	2	middle									19	2.61
3	2	middle									17.69	2.02
3	2	middle									19.4	2.69
3	2	middle									20.46	2.23
3	2	middle									19.7	2.92
3	2	middle									19.85	2.89
3	2	middle									19.18	2.54
3	2	middle									20.34	2.23
3	2	middle									19.73	2.35
3	2	middle									18.74	2.94
4	2	middle											29.98	2.87
4	2	middle											38.99	2.02
4	2	middle											30.69	2.56
4	2	middle											38.68	2.92
4	2	middle											33.8	2.86
4	2	middle											35.59	3.58
4	2	middle											35.48	2.99
4	2	middle											36.61	2.68
4	2	middle											36.14	2.73
4	2	middle											33.73	2.4
4	2	middle											31.69	2.23
4	2	middle											31.3	2.18
4	2	middle											32.91	2.74
4	2	middle											36.59	2.6
4	2	middle											31.72	2.71
4	2	middle											34.89	2.99
4	2	middle											31.45	3.03
4	2	middle											32.57	1.71
4	2	middle											35.35	3.26
4	2	middle											40.13	4.13
4	2	middle											43.24	3.47
4	2	middle											36.22	3.47
4	2	middle											41.07	4.46
4	2	middle											40.48	3.38
4	2	middle											39.32	3.78
4	2	middle											43.3	3.25
4	2	middle											39.74	1.93
4	2	middle											37.26	2.91
4	2	middle											38.22	2.35
4	2	middle											32.51	2.77
5	2	middle					49.14	6.77
5	2	middle					40.7	5.42
5	2	middle					38.18	6.01
5	2	middle					35.47	5.84
5	2	middle					40.91	6.63
5	2	middle					41.4	6.18
5	2	middle					45.18	7.22
5	2	middle					44.78	6.75
5	2	middle					38.01	5.8
5	2	middle					37.73	6.1
5	2	middle					42.34	5.84
5	2	middle					37.19	6.1
5	2	middle					37.87	5.78
5	2	middle					38.91	5.91
5	2	middle					38	5.6
5	2	middle					39.43	6.19
5	2	middle					40.2	5.04
5	2	middle					41.24	6.29
5	2	middle					35.36	5.24
5	2	middle					42.41	5.93
5	2	middle					38.87	4.41
5	2	middle					42.46	6.05
5	2	middle					41.56	4.8
5	2	middle					38.02	6.52
5	2	middle					38.96	6.46
5	2	middle					37.19	7.8
5	2	middle					37.47	7.34
5	2	middle					39.08	7.89
5	2	middle					42.79	6.48
5	2	middle					42.34	8.06
6	2	middle					27.24	4.47			17.37	2.22
6	2	middle					28.24	5.33			15.93	2.15
6	2	middle					32.18	5.32			17.41	2.68
6	2	middle					29.24	4.7			18.21	2.35
6	2	middle					28.84	5.09			18.52	2.32
6	2	middle					27.99	5.23			16.08	2.15
6	2	middle					31.81	4.84			18.82	2.96
6	2	middle					30.32	5.12			17.17	2.79
6	2	middle					30.14	4.14			15.27	2.88
6	2	middle					30.63	4.91			19.14	2.65
6	2	middle					31.84	5.26			17.14	3.28
6	2	middle					31.62	4.91			18.48	2.99
6	2	middle					26.97	5.6			16.41	2.89
6	2	middle					30.51	5.32			19.2	2.89
6	2	middle					31.01	5.42			17.23	2.51
6	2	middle					33.93	5.68			17.16	2.32
6	2	middle					30.06	4.23			17.4	2.08
6	2	middle					28.06	3.99			16.85	2.61
6	2	middle					25.37	4.46			17.92	2.34
6	2	middle					26.52	5.2			16.9	2.29
6	2	middle					27.75	4.95			15.3	1.7
6	2	middle					25.15	3.86			18.04	2.67
6	2	middle					30.61	5.02			16.98	2.12
6	2	middle					25.78	4.46			17.57	2.23
6	2	middle					28.85	5.24			15.75	2.86
6	2	middle					25.28	4.6			15.9	2.85
6	2	middle					29.83	5.08			16.24	2.63
6	2	middle					29.97	4.53			16.51	2.48
6	2	middle					31.5	4.8			18.76	2.64
6	2	middle					33.55	5.71			17.11	2.6
7	2	middle			65.87	10.64							41.25	3.34
7	2	middle			65.27	8.98							46.95	4.63
7	2	middle			63.56	7.61							50.3	4.42
7	2	middle			65.58	9.57							48.65	4.13
7	2	middle			70.12	7.26							43.92	4.61
7	2	middle			67.64	8.74							47.4	5.62
7	2	middle			64.39	10.74							42.52	3.45
7	2	middle			67.33	10.6							52.68	4.59
7	2	middle			65.28	6.77							51.88	4.46
7	2	middle			60.92	8.17							48.3	3.73
7	2	middle			69.82	7.77							45.75	4.61
7	2	middle			67.27	9.57							47.8	4.11
7	2	middle			73.73	10.26							45.1	3.64
7	2	middle			68.03	11.31							43.83	5.93
7	2	middle			70	9.16							51.71	6.71
7	2	middle			63.46	9.11							42.89	4.48
7	2	middle			61.21	10.38							45.17	3.73
7	2	middle			65.24	9.48							46.75	3.72
7	2	middle			65.38	9.13							40.9	3.53
7	2	middle			65.57	9.67							53.56	5.23
7	2	middle			67.02	9.83							49.28	5.84
7	2	middle			62.46	10.46							44.8	4.32
7	2	middle			63.99	9.59							48.85	5.1
7	2	middle			62.62	10.19							45.77	4.25
7	2	middle			62.19	9.59							42.75	3.08
7	2	middle			66.09	8.67							41.25	4.59
7	2	middle			65.62	8.9							44.99	3.96
7	2	middle			67.2	10.01							47.27	4.72
7	2	middle			63.76	9.63							45.18	3.49
7	2	middle			65.29	1.09							43.27	4.71
8	2	middle
8	2	middle
8	2	middle
8	2	middle
8	2	middle
8	2	middle
8	2	middle
8	2	middle
8	2	middle
8	2	middle
8	2	middle
8	2	middle
8	2	middle
8	2	middle
8	2	middle
8	2	middle
8	2	middle
8	2	middle
8	2	middle
8	2	middle
8	2	middle
8	2	middle
8	2	middle
8	2	middle
8	2	middle
8	2	middle
8	2	middle
8	2	middle
8	2	middle
8	2	middle
9	2	middle			83.59	13.04	41.99	5.45	27.13	3.93	32.07	3.69	63.7	6.65
9	2	middle			82.03	13.47	45.95	6.54	26.41	3.66	33.43	3.65	62.65	6.49
9	2	middle			80.98	13.88	38.74	6.01	25.69	2.73	33.1	3.65	59.81	5.97
9	2	middle			83.62	12.33	35.1	5.23	25.64	3.21	31.17	3.92	67.43	5.84
9	2	middle			71.72	13.83	41.22	5.51	26.38	4.08	31.09	4.23	63.24	6.55
9	2	middle			87.79	12.5	44.88	4.53	27.36	3.36	34.1	3.36	70.22	7.35
9	2	middle			85.13	13.74	38.98	4.87	26.88	3.45	32.51	3.44	64.64	7.52
9	2	middle			89.6	12.41	42.76	6.35	26.84	3.47	26.9	3.17	64.51	6.66
9	2	middle			83.16	12.39	44.57	6.25	27.17	3.8	30.03	3.02	62.45	6.51
9	2	middle			82.73	14.05	38.21	4.97	28.56	3.54	35.59	3.15	67.49	6.84
9	2	middle			80.98	13.31	38.34	6.28	25.67	3.49	30.44	3.43	62.12	5.72
9	2	middle			83.26	13.55	47.45	6.88	30.59	3.18	29.87	3.89	68.98	6.68
9	2	middle			80.69	13.58	35.59	7.4	27.69	3.49	34	3.55	67.13	5.16
9	2	middle			79.27	16.09	36.06	6.29	26.77	3.74	35.21	3.43	61.84	7.13
9	2	middle			82.32	14.02	39.57	6.83	29.89	3.53	28.53	3.36	65.63	6.22
9	2	middle			82	15.47	44.8	8.94	25.95	3.61	32.64	2.07	62.43	5.91
9	2	middle			85.64	14.02	39.52	6.14	28.54	3.53	33.52	2.98	67.03	6.29
9	2	middle			85.57	12.82	44.63	6.44	28.18	3.15	29.67	3.18	58.39	5.94
9	2	middle			82.4	15.91	45.21	5.66	26.74	3.85	31.6	4.35	64.15	5.69
9	2	middle			84.25	15.5	45.25	5.44	27.35	3.25	29.93	4.49	60.72	6.99
9	2	middle			81.58	13.36	52.21	7.05	27.85	4.04	29.88	4.42	61.62	6.6
9	2	middle			84.19	18.86	49.17	5.98	27	4.4	32.47	4.61	63.86	6.76
9	2	middle			83.6	15.11	48.88	6.71	27.55	4.4	32.06	3.7	65.63	6.47
9	2	middle			83.92	16.48	37.92	5.81	25.11	3.97	30.19	3.93	61.41	6.94
9	2	middle			82.84	16.03	42.17	6.35	28	3.24	33.62	3.49	58.92	6.82
9	2	middle			81.58	16.01	41.95	6.88	28.46	3.94	32.37	3.31	66.34	6.5
9	2	middle			87.04	14.92	39.71	7.56	31.28	4.43	31.1	3.27	63.55	6.95
9	2	middle			86.4	14.2	46.3	7.07	36.66	3.35	29.9	3.06	61.63	5.91
9	2	middle			89.53	15.92	48.38	7.56	23.59	3.15	32.85	2.91	62.61	5.44
9	2	middle			82.75	16.38	42.53	6.65	25.64	4.13	31.89	3.94	65.21	6.38
10	2	middle					38.95	5.1	23.47	2.45	26.03	3.05
10	2	middle					36.98	4.88	23.18	2.43	27.08	2.68
10	2	middle					36.94	5.04	21.34	2.86	24.11	3
10	2	middle					35.84	4.57	20.87	2.73	22.8	3.21
10	2	middle					37.99	4.58	22.64	2.69	29.3	2.43
10	2	middle					35.81	3.94	22.65	2.86	23.58	3.12
10	2	middle					37.01	4.77	21.59	3.54	23.47	2.96
10	2	middle					38.35	4.88	22.86	3.44	24.89	2.95
10	2	middle					44.09	5.04	21.83	3.21	23.35	3.02
10	2	middle					42	4.56	21.82	2.65	26.1	3.15
10	2	middle					41.9	4.79	20.97	2.65	24.16	3.23
10	2	middle					41.5	4.15	21.76	3.25	23.34	2.52
10	2	middle					41.72	5.12	20.72	2.31	26.24	2.83
10	2	middle					43.42	5.59	22.07	2.68	25.14	2.86
10	2	middle					43.41	6.31	23.04	2.22	25.55	3.33
10	2	middle					39.42	5.81	21.98	3.25	23.34	3.12
10	2	middle					39.19	5.34	23.06	3.04	27.24	2.68
10	2	middle					43.34	6.6	23.88	3.08	26.54	3.15
10	2	middle					42.41	6.13	22.25	2.2	25.49	2.86
10	2	middle					45.6	7.16	21.97	2.32	24.12	2.87
10	2	middle					45.47	7.57	22.22	1.93	25.01	2.73
10	2	middle					41.94	4.8	23.54	2.28	24.19	3.42
10	2	middle					45.35	5.34	22.06	2.65	23.79	3.25
10	2	middle					44.07	4.95	23.74	2.86	26.54	3.21
10	2	middle					40.4	4.48	25.31	2.36	26.9	2.83
10	2	middle					40.71	4.9	26.89	3.14	26.5	2.49
10	2	middle					44.32	5	26.23	3.52	25.23	2.58
10	2	middle					36.96	4.48	22.15	2.67	25.62	2.36
10	2	middle					38.6	6.29	22.73	2.49	28.04	2.68
10	2	middle					38.27	5	22.63	2.83	28.66	2.93
2	2	high					34.59	5.32			28.68	4.16
2	2	high					34.28	5.57			27.6	3.72
2	2	high					35.35	6.31			21.33	2.41
2	2	high					32.49	4.98			21.12	2.6
2	2	high					33.71	5.5			21.89	2.35
2	2	high					31.75	5.23			20.53	2.26
2	2	high					30.72	3.71			20.61	2.16
2	2	high					32.23	5.51			22.32	2.88
2	2	high					31.44	4.93			20.37	2.1
2	2	high					30.89	5.37			21.68	2.58
2	2	high					31.73	6.29			18.59	2.08
2	2	high					33.4	6.15			21.25	2.38
2	2	high					31.93	4.83			19.11	2.3
2	2	high					30.58	4.8			19.37	2.4
2	2	high					32.88	4.75			21.14	2.26
2	2	high					30.32	4.78			19.56	2.86
2	2	high					35.61	4.75			20.59	2.5
2	2	high					32.51	4.48			20.05	2.58
2	2	high					32.92	5.11			19.91	1.94
2	2	high					31.45	4.8			19.91	2.08
2	2	high					30.79	4.94			18.1	2.29
2	2	high					32.4	5.11			21.14	2.32
2	2	high					35.74	5.23			19.5	3.17
2	2	high					29.32	5.66			20.13	2.86
2	2	high					30.75	6.11			20.41	2.14
2	2	high					31.54	5.98			20.38	2.66
2	2	high					29.65	4			20.69	2.3
2	2	high					33.67	6.04			19.47	2.7
2	2	high					33.94	4.82			21.3	3.07
2	2	high					33.55	5.27			21.79	2.29
3	2	high							19.98	2.37	20.7	2.18
3	2	high							21.49	2.12	23.5	2.38
3	2	high							22.62	2.41	22.16	2.6
3	2	high							21.49	2.12	22.41	1.72
3	2	high							22.62	2.41	20.26	2.7
3	2	high							22.05	3.26	23.56	2.55
3	2	high							19.89	2.62	23.63	2.18
3	2	high							19.22	3.04	21.73	2.61
3	2	high							20.47	2.73	22.65	2.35
3	2	high							21.34	2.85	22.2	2.34
3	2	high							19.11	2.56	20.82	2.5
3	2	high							17.21	3.1	21.55	2.48
3	2	high							18.55	2.54	21.29	3.04
3	2	high							24.43	2.94	20.85	2.25
3	2	high							19.6	2.89	23.65	2.41
3	2	high							21.15	2.87	21.8	2.33
3	2	high							19.14	3.1	19.82	2.79
3	2	high							19.74	3.6	20.26	2.87
3	2	high							29.45	3.91	22.9	2.4
3	2	high							22.72	2.01	22.72	2.73
3	2	high							18.87	2.36	23.05	2.89
3	2	high							21.22	2.15	23.33	2.51
3	2	high							19.98	2.79	17.89	2.6
3	2	high							20.42	2.09	22.7	2.15
3	2	high							23.67	3.17	20.34	3.65
3	2	high							19.11	3.08	20.27	3.86
3	2	high							21.43	3.08	18.36	2.94
3	2	high							20.18	3.01	21.5	2.41
3	2	high							17.64	2.3	21.37	2.92
3	2	high							18.85	2.87	22.25	2.06
4	2	high											36	2.8
4	2	high											33.28	2.18
4	2	high											36.9	2.41
4	2	high											33.31	2.85
4	2	high											34.78	2.26
4	2	high											34.96	2.35
4	2	high											35.12	2.56
4	2	high											32.68	2.35
4	2	high											43.07	5.88
4	2	high											34	2.06
4	2	high											32.25	2.35
4	2	high											39.32	3.27
4	2	high											35.7	2.79
4	2	high											33.08	2.69
4	2	high											37.13	2.79
4	2	high											41.06	3.18
4	2	high											35.34	2.8
4	2	high											36.81	2.8
4	2	high											36.45	3.38
4	2	high											38.91	3.43
4	2	high											35.44	2.48
4	2	high											35.35	2.18
4	2	high											41.72	5.64
4	2	high											34.17	2.73
4	2	high											33.61	2.77
4	2	high											34.28	2.97
4	2	high											34.08	2.51
4	2	high											31.84	2.61
4	2	high											29.56	2.09
4	2	high											33.22	3.22
5	2	high			73.7	13.66	39.57	7.3	26.08	4.36
5	2	high			77.15	10.63	39.71	6.85	24.96	4.02
5	2	high			75.35	12.75	45.3	6.57	23.31	3.49
5	2	high			78.73	11.86	39.76	8.44	24.8	4.02
5	2	high			82	11	36.6	8.24	23.78	4.31
5	2	high			73.55	14.1	34.14	7.11	25.43	4.44
5	2	high			77.22	11.56	40.06	6.43	24.17	4.67
5	2	high			73.13	12.07	36.77	5.96	24.85	5.38
5	2	high			75.24	10.81	40.12	7.38	30.71	5.48
5	2	high			75.51	11.33	44.43	7.45	29.63	5.37
5	2	high			68.28	16.01	43	7.05	28.6	4.56
5	2	high			71.99	15.22	41.43	6.99	24.71	3.54
5	2	high			71	14.56	38.73	6.71	25.33	3.34
5	2	high			74.49	13.21	39.33	5.69	23.78	2.79
5	2	high			68.79	15.49	38.4	6.27	23.14	3.53
5	2	high			68.86	14.98	41.53	7.96	22.28	3.39
5	2	high			73.31	15.15	39.25	5.48	25.18	3.5
5	2	high			68.07	15.37	43.46	6.42	21.33	3.53
5	2	high			77.12	14.46	40.99	6.14	27.09	3.05
5	2	high			72.25	16.43	46.73	5.32	20.97	3.69
5	2	high			76.6	11.82	38.87	5.17	21.89	3.66
5	2	high			74.77	14.28	44.68	5.33	28.65	5
5	2	high			73.19	11.93	41.51	6.09	23.59	2.55
5	2	high			69.03	13.88	37.47	6.01	30.03	4.09
5	2	high			71.12	13.9	36.99	7.48	21.34	3.44
5	2	high			69.03	13.88	42.15	8.04	25.08	4.46
5	2	high			78.04	14.11	41.88	6.87	31.23	4.91
5	2	high			75.65	13.37	37.46	5.67	31.21	5.17
5	2	high			82.89	15.42	38.29	7.06	36.45	5.5
5	2	high			74.58	13.52	39.5	5.95	36.27	4.89
6	2	high					31.08	6.41			17.51	3.35
6	2	high					33.19	5.92			16.13	3.04
6	2	high					28.7	6.27			16.65	2.61
6	2	high					33.42	8			15.28	3.04
6	2	high					29.54	5.51			16.37	3.08
6	2	high					27.13	5.49			18.97	2.54
6	2	high					32.43	5.08			18.02	2.77
6	2	high					33.38	5.88			17.91	2.73
6	2	high					29.06	5.97			16.47	3.34
6	2	high					26.64	5.12			16.9	3.4
6	2	high					34.29	5.39			15.08	1.92
6	2	high					26.54	6.02			18.19	2.41
6	2	high					29.94	5.83			17.77	2.56
6	2	high					28.64	5.8			18.64	2.97
6	2	high					33.74	5.77			17.95	2.48
6	2	high					33.16	6.34			18.78	2.01
6	2	high					31	5.65			18.97	3
6	2	high					27.98	5.4			17.61	3.22
6	2	high					29.39	5.83			18.31	3.05
6	2	high					32.64	5.42			17.32	2.5
6	2	high					29.88	5.67			19.11	3.76
6	2	high					31.44	4.19			20.16	3.72
6	2	high					29.57	5.45			16.86	3.34
6	2	high					29.8	5.19			19.95	2.75
6	2	high					30.02	4.14			16.38	2.61
6	2	high					29.59	4.88			19.68	2.8
6	2	high					31.52	4.46			18.17	2.73
6	2	high					32.06	5.26			19.86	3.03
6	2	high					34.16	5.83			15.5	2.73
6	2	high					30.5	4.35			18.06	2.75
7	2	high
7	2	high
7	2	high
7	2	high
7	2	high
7	2	high
7	2	high
7	2	high
7	2	high
7	2	high
7	2	high
7	2	high
7	2	high
7	2	high
7	2	high
7	2	high
7	2	high
7	2	high
7	2	high
7	2	high
7	2	high
7	2	high
7	2	high
7	2	high
7	2	high
7	2	high
7	2	high
7	2	high
7	2	high
7	2	high
8	2	high
8	2	high
8	2	high
8	2	high
8	2	high
8	2	high
8	2	high
8	2	high
8	2	high
8	2	high
8	2	high
8	2	high
8	2	high
8	2	high
8	2	high
8	2	high
8	2	high
8	2	high
8	2	high
8	2	high
8	2	high
8	2	high
8	2	high
8	2	high
8	2	high
8	2	high
8	2	high
8	2	high
8	2	high
8	2	high
9	2	high					43.88	6.14	37.65	4.11
9	2	high					43.64	5.67	35.16	4.01
9	2	high					47.34	7.34	41.86	4.8
9	2	high					43.24	5.51	42.45	4.88
9	2	high					44.16	5.98	35.94	3.54
9	2	high					44.01	7.17	31.66	4.44
9	2	high					45.66	5.62	38.13	4.37
9	2	high					40.43	6.85	41.1	5.23
9	2	high					44.89	6.08	41.74	4.56
9	2	high					45.61	6.22	32.7	3.93
9	2	high					51.18	6.08	32.59	4.43
9	2	high					44.13	6.09	48.93	5.23
9	2	high					42.47	5.05	39.92	4.31
9	2	high					42.72	5.04	46.24	5.59
9	2	high					45.64	4.76	43.47	5.08
9	2	high					42.93	6.4	32.63	3.81
9	2	high					47.19	5.49	37.37	4.22
9	2	high					46.91	5.1	35.74	4.25
9	2	high					40.59	5.36	32.43	4.23
9	2	high					49.62	5.98	28.23	3.43
9	2	high					45.07	5.87	29.84	4.92
9	2	high					40.2	5.21	34.81	4.13
9	2	high					44.68	5.69	43.24	4.57
9	2	high					46.98	6.6	27.44	3.7
9	2	high					45.69	5.6	40.96	4.56
9	2	high					42.53	5.49	33.19	3.7
9	2	high					50.35	6.63	29.69	3.94
9	2	high					44.57	5.81	46.66	5.49
9	2	high					48.27	6	37.16	4.61
9	2	high					42.76	6.65	26.17	4.12
10	2	high			65.69	10.6	34.27	4.4			24.12	2.32
10	2	high			69.62	10.57	34.06	4.28			26.08	2.86
10	2	high			67.49	12.83	38.44	5.94			24.31	2.52
10	2	high			69.81	10.47	33.36	4.45			23.57	1.9
10	2	high			68.31	10.78	38.18	5.13			23.72	2.56
10	2	high			66.52	9.32	33.49	4.63			23.27	2.22
10	2	high			68.38	11.12	32.41	4.79			22.54	2.28
10	2	high			69.52	10.6	35.04	5.03			24.34	2.06
10	2	high			68.8	11.06	30.55	5.14			22.67	2.06
10	2	high			66.52	9.56	35.36	5.72			23.24	2.82
10	2	high			75.2	12.34	34.89	5.68			21.13	2.2
10	2	high			69.24	12.39	36.4	5.52			22.18	2.74
10	2	high			71.63	13.69	34.93	4.49			25.07	2.52
10	2	high			73.55	11.18	31.96	4.79			23.62	2.28
10	2	high			66.17	10.64	31.27	4.79			24.7	2.22
10	2	high			74.21	10.94	36.66	5.36			23.86	2.76
10	2	high			78.17	11.17	33.79	4.24			23.85	2.52
10	2	high			70.2	14.96	35.5	4.77			19.82	2.04
10	2	high			76.8	12.38	37.15	5.05			22.81	1.93
10	2	high			67.13	13.63	35.43	5.34			23.34	2.55
10	2	high			71.68	12.85	33.03	5.3			23.71	2.28
10	2	high			68.75	11.45	37.69	6.14			27.46	3.02
10	2	high			70.61	14.66	34.57	5.4			26.21	3.17
10	2	high			68.43	12.95	38.74	5.19			25.61	3.23
10	2	high			68.83	11.58	35.02	5.3			26.83	3.49
10	2	high			72.82	12.59	32.13	4.07			22.79	2.67
10	2	high			68.94	10.21	38.27	7.05			26.92	2.21
10	2	high			73.96	12.75	32.96	5.93			23.16	3.03
10	2	high			75.12	11.28	29.7	4.58			24.82	2.56
10	2	high			72.24	11.5	33.08	5.4			24.48	3.06
1	3	low					33.01	4.76			20.2	2.78
1	3	low					32.56	5.2			21.11	3.38
1	3	low					31.21	4.7			23.24	3.35
1	3	low					31.35	4.55			21.11	2.77
1	3	low					34.07	5.62			19.48	2.84
1	3	low					32.79	5.65			21.85	2.7
1	3	low					33.04	5.14			23.36	3.12
1	3	low					34.28	6.18			22.89	2.82
1	3	low					34.39	5.96			20.71	3.07
1	3	low					31.41	5.46			22.77	2.61
1	3	low					39.01	6.03			23.83	2.24
1	3	low					37.88	6.1			21.44	3.11
1	3	low					37.22	6.01			22.79	2.6
1	3	low					36.7	5.65			21.02	3.46
1	3	low					36.09	6.34			22.94	2.43
1	3	low					34.75	5.5			22.23	3.38
1	3	low					37.68	6.7			20.45	3.72
1	3	low					35.62	5.61			23.25	3.25
1	3	low					33.96	6.3			22.32	2.86
1	3	low					39.82	6.31			23.69	2.78
1	3	low					38.03	5.5			20.61	3.03
1	3	low					37.96	5.64			24.23	3.13
1	3	low					31.99	5.8			21.53	3.38
1	3	low					33.7	5.66			21.59	2.58
1	3	low					34.34	5.62			22.09	3
1	3	low					37.16	6.19			23.46	3.53
1	3	low					35.55	5.81			21.65	2.42
1	3	low					36.23	5.76			23.15	2.58
1	3	low					34.24	5.8			23.09	3.38
1	3	low					38.15	5.57			22.57	2.75
1	3	middle					34.63	5.66			21.79	2.51
1	3	middle					31.24	5.46			19.71	3.17
1	3	middle					32.01	5.01			19.39	2.51
1	3	middle					33.4	5.46			20.13	3.28
1	3	middle					32.5	5.35			20.8	2.82
1	3	middle					31.35	5.87			18.66	2.5
1	3	middle					31.32	5.2			22.02	2.79
1	3	middle					33.98	6.4			22.59	3.12
1	3	middle					32.41	5.07			22.02	2.32
1	3	middle					30.62	5.62			20.67	2.78
1	3	middle					35.64	5.46			21.91	2.89
1	3	middle					30.47	5.17			22.97	2.7
1	3	middle					34.11	5.43			21.91	2.1
1	3	middle					34.77	4.77			22.02	2.86
1	3	middle					33.07	4.85			23.53	3.24
1	3	middle					32.23	5.23			23.09	2.38
1	3	middle					30.47	4.94			20.19	3.15
1	3	middle					33.51	5.06			22.74	3.01
1	3	middle					33.15	4.88			20.24	3.2
1	3	middle					30.95	4.57			22.9	3.13
1	3	middle					30.53	4.78			21.22	3.01
1	3	middle					36.82	6.02			22.12	2.84
1	3	middle					32.48	5.06			21.24	2.88
1	3	middle					31.22	4.88			21.62	2.48
1	3	middle					31.68	4.62			19.86	2.97
1	3	middle					31.22	4.88			22.87	2.38
1	3	middle					31.68	4.62			21.41	3.43
1	3	middle					34.5	4.87			21.58	2.66
1	3	middle					35.81	4.55			22.56	3.57
1	3	middle					34.51	5.1			21.41	3.81
1	3	high					33.22	4.65
1	3	high					34.15	4.51
1	3	high					32.59	4.85
1	3	high					29.45	5.15
1	3	high					36.76	4.92
1	3	high					35.55	4.47
1	3	high					32.01	4.64
1	3	high					34.98	5.17
1	3	high					34	5.39
1	3	high					32.48	5.1
1	3	high					32.23	5.83
1	3	high					32.6	5.05
1	3	high					36.84	5.99
1	3	high					35.62	4.74
1	3	high					37.07	5.43
1	3	high					31.68	5.06
1	3	high					30.25	4.4
1	3	high					33.53	4.22
1	3	high					35.5	4.91
1	3	high					34.01	4.14
1	3	high					31.61	4.95
1	3	high					30.62	5.04
1	3	high					29.96	4.1
1	3	high					32.75	4.4
1	3	high					33.45	5.41
1	3	high					33.91	4.96
1	3	high					33.31	4.74
1	3	high					37.47	4.75
1	3	high					34.07	4.33
1	3	high					32.29	5.75
2	3	low	32.6	5.46
2	3	low	36.44	4.92
2	3	low	35.68	7.53
2	3	low	32.54	6.09
2	3	low	34.13	4.64
2	3	low	30.94	5.98
2	3	low	34.51	6.19
2	3	low	35.44	6.21
2	3	low	33.71	7
2	3	low	32.89	6.47
2	3	low	32.37	5.43
2	3	low	30.97	5.67
2	3	low	36.59	4.93
2	3	low	33.53	5.06
2	3	low	32.21	5.33
2	3	low	32.77	6.75
2	3	low	33.61	5.78
2	3	low	31.95	5.61
2	3	low	34.17	5.61
2	3	low	32.67	5.54
2	3	low	33.96	5.62
2	3	low	28.33	5.62
2	3	low	36.95	5.2
2	3	low	36.75	4.62
2	3	low	36.08	5.56
2	3	low	33.3	6.34
2	3	low	25.54	6.65
2	3	low	31.05	5.62
2	3	low	32.93	6.45
2	3	low	34.33	6.09
3	3	low									23.59	2.4	59.1	6.3
3	3	low									20.77	2.65	56.73	5.98
3	3	low									22.04	2.43	65.75	7.09
3	3	low									24.59	4.57	55.76	5.91
3	3	low									25	4.29	62.99	6.42
3	3	low									24.7	3.93	69.32	6.08
3	3	low									22.39	2.98	53.33	5.56
3	3	low									23.72	2.69	55.23	6.23
3	3	low									23.21	2.54	62.39	6.28
3	3	low									22.04	2.7	62.11	7.11
3	3	low									23.03	2.69	63.37	5.66
3	3	low									23.91	3.17	62.28	5.81
3	3	low									24.58	3.87	60.68	6.09
3	3	low									25.97	3.64	59.9	5.96
3	3	low									26.15	3.3	66.77	6.08
3	3	low									26.88	3.83	58.68	5.3
3	3	low									24.64	3.55	55.17	7.28
3	3	low									24.52	3.05	63.04	5.72
3	3	low									24.13	3.51	61.65	6.55
3	3	low									24.55	3.26	64.33	6.59
3	3	low									27.07	3.27	55.13	7.05
3	3	low									24.13	3.74	56.11	5.18
3	3	low									22.47	3.74	58.03	5.91
3	3	low									25.88	3.17	59.78	5.69
3	3	low									28.13	3.15	59.42	6.14
3	3	low									25.2	3.36	56.88	6.27
3	3	low									26.42	3.17	56.3	6.08
3	3	low									27.38	3.23	57.9	6.34
3	3	low									25.27	3.83	53.14	6.75
3	3	low									24.24	3.3	58.51	4.71
4	3	low	47.99	6.52
4	3	low	40.56	8.88
4	3	low	43.44	9.57
4	3	low	42.44	9.52
4	3	low	42.96	6.9
4	3	low	44.13	8.53
4	3	low	41.12	8.7
4	3	low	36.45	5.24
4	3	low	41.89	9.39
4	3	low	44	8.32
4	3	low	41.32	6.9
4	3	low	40.45	6.89
4	3	low	42.33	8.5
4	3	low	41.78	7.82
4	3	low	36.83	7.91
4	3	low	43.74	9.3
4	3	low	41.44	7.5
4	3	low	42.25	7.05
4	3	low	42.46	10
4	3	low	44.33	11.08
4	3	low	41.3	10.93
4	3	low	48.38	8.01
4	3	low	39.48	6.69
4	3	low	43.47	8.54
4	3	low	44.41	9.55
4	3	low	44.85	9.44
4	3	low	37.36	6.47
4	3	low	46.71	7.61
4	3	low	42	7.9
4	3	low	41.82	8.67
5	3	low	45.46	8.04			42.02	7.34
5	3	low	39.69	8.69			37.06	6.18
5	3	low	51.65	6.98			38.11	7.45
5	3	low	46	6.82			39.23	6.12
5	3	low	49.12	9.42			40.65	7.2
5	3	low	45.51	6.64			37.24	6.78
5	3	low	55.41	7.84			42.47	7.57
5	3	low	50.54	6.99			41	7.91
5	3	low	51.11	6.68			39.24	5.31
5	3	low	47.6	5.94			30.01	4.43
5	3	low	38.19	5.87			29.82	5.17
5	3	low	42.92	7.08			37.06	5.39
5	3	low	42.86	5.19			35.43	5.51
5	3	low	47.64	8.26			36.37	5.1
5	3	low	47.08	8.17			31.04	4.06
5	3	low	49.12	7.89			31.82	5.12
5	3	low	46.61	6.52			34.54	4.78
[truncated: 7,911 more rows]

## Sheet: Cerianthus sp.
cnida type_l=length	cnida type_w= width
Marginal tentacles		Cnida Types
Specimen	Level	atrich_l	atrich_w	mbI_l	mbI_w	mbII_l	mbII_w	mbIII_l	mbIII_w	mbV_l	mbV_w	mbVI_l	mbVI_w	mbVII_l	mbVII_w
1	low			31.82	6.81			20.85	2.36
1	low			28	5.8			18.46	2.15
1	low			33.17	5.97			23.87	2.29
1	low			32.56	5.69			19.01	1.94
1	low			33.03	5.67			21.04	2.15
1	low			29.09	5.01			23.83	2.46
1	low			34.27	5.42			18.36	2.24
1	low			27.12	5.15			20.42	2.31
1	low			32.57	5.07			24.95	2.94
1	low			31.95	5.67			18.52	2.17
1	low			25.07	3.97			21.26	2.31
1	low			33.39	5.35			17.95	2.09
1	low			30.17	5.77			18.47	2.55
1	low			36.02	5.06			22.33	2.8
1	low			30.01	4.16			17.64	2.09
1	low			31.26	6.31			21.47	2.12
1	low			29.96	7.37			20.38	2.29
1	low			32.01	6.26			23.69	2.13
1	low			25.84	5.48			19.14	2.28
1	low			31.81	5.94			23.2	2.29
1	low			31.5	5.77			21.82	2.14
1	low			31.94	4.85			18.03	2.09
1	low			28.57	5.14			25.26	2.67
1	low			34.67	6.76			19.32	2.19
1	low			31.44	4.71			16.77	2.37
1	low			36.79	5.77			20.69	2.65
1	low			30.16	6.52			20.31	2.09
1	low			33.52	5.21			18.65	2.52
1	low			31.2	4.99			20.57	2.6
1	low			31.11	5.17			21.74	2.58
1	low			29.18	4.34			19.27	2.35
1	low			26.97	4.38
1	low			23.43	3.9
1	low			28.04	4.21
1	low			25.75	5.14
1	low			25.71	4.09
1	low			30.31	5.24
1	low			23.96	3.99
1	low			27.48	6.03
1	low			35.06	7.53
1	low			25.46	4.57
1	low			31.61	6.06
1	low			32.31	6.56
1	low			27.15	5.53
1	low			25.62	4.85
1	low			26.51	4.91
1	low			27.06	6.07
1	low			28.56	5.68
1	low			25.73	6.1
1	low			34.02	6.23
1	low			29.38	6.54
1	low			37.12	7.73
1	low			24.92	5.2
1	low			27.25	6.17
1	low			29.82	6.42
1	low			36.61	7.93
1	low			29.02	5.93
1	low			28.67	5.73
1	low			27.7	5.25
1	low			27.95	6.13
1	low			27.25	4.9
1	low			33.86	5.49
1	low			32.79	6.38
1	low			29.39	4.56
1	low			29.37	6.24
1	low			27.1	4.24
1	low			31.08	5.25
1	low			26.99	4.81
1	low			26.58	4.52
1	low			28.07	4.96
1	low			25.69	4.12
1	low			24.75	4.47
1	low			27.69	4.79
1	low			30.3	5.56
1	low			30.89	5.29
1	low			34.66	5.68
1	low			28.08	4.43
1	low			30	4.49
1	low			32.55	5.19
1	low			26.31	5.17
1	low			28.3	5.5
1	low			32.86	5.84
1	low			32.52	5.02
1	low			29.04	5.07
1	low			34.43	5.89
1	low			26.58	4.36
1	low			34.32	7.17
1	low			27.92	4.98
1	low			27.19	4.7
1	low			27.95	4.37
1	low			30.98	5.09
1	low
1	low
1	low
1	low
1	low
1	low
1	low
1	low
1	low
1	low
1	low
1	low
1	low
1	low
1	low
1	low
1	low
1	low
1	low
1	low
1	low
1	low
1	low
1	low
1	low
1	low
1	low
1	low
1	low
4	low					20.62	3.24					30.61	4.7
4	low					16.57	2.89					32.41	4.67
4	low					20.43	3.28					31.92	3.96
4	low					14.95	3.07					37.82	3.95
4	low					16.41	3.11					35.3	3.31
4	low					18.08	3.62					32.47	4.12
4	low					16.79	2.67					32.5	3.94
4	low					17.56	3.55					37.13	3.02
4	low					20.69	4.11					33.07	3.05
4	low					17.98	3.37					31.93	3.48
4	low					16.33	3.13					32.42	4.31
4	low					19.4	3.72					31.68	3.88
4	low					18.2	2.67					32.07	3.8
4	low					18.89	2.56					36.49	5.5
4	low					15.9	3.05					30.39	3.86
4	low					17.56	3.39
4	low					19.17	2.71
4	low					18.36	2.89
4	low					16.85	3.07
4	low					17.4	2.98
4	low					15.35	2.93
4	low					20.68	2.89
4	low					16.82	2.7
4	low					19.09	2.68
4	low					18.96	2.89
4	low					15.5	2.48
4	low					23.11	2.84
4	low					18.37	2.95
4	low					20.23	3.01
4	low					18.82	2.63
4	low					18.7	3.25
4	low					16.71	2.51
4	low					19.97	2.82
4	low					16.87	2.42
4	low					16.69	3.06
4	low					16.9	3.35
4	low					14.97	2.37
4	low					15.23	3.31
4	low					20.28	2.81
4	low					13.4	2.05
4	low					14.96	2.35
4	low					17.46	2.57
4	low					18.91	2.91
4	low					14.9	2.35
4	low					17.39	3.17
4	low					16.93	2.29
4	low					15.13	2.2
4	low					14.85	2.11
4	low					15.51	2.49
4	low					19.94	2.7
4	low					15.19	1.96
4	low					16.6	2.25
4	low					14.28	3.03
4	low					18.16	2.99
4	low					17.04	2.95
4	low					12.74	1.79
4	low					16.18	2.9
4	low					16.98	2.53
4	low					17.04	2.24
4	low					16.67	2.36
4	low					21.32	3.86
4	low					23.74	3.82
4	low					18.98	3.64
4	low					20.91	4.32
4	low					21.36	3.53
4	low					19.68	3.54
4	low					19.18	4.33
4	low					18.57	4.08
4	low					20.49	4.24
4	low					21.05	4.56
4	low					18.72	4.03
4	low					20.7	3.59
4	low					19.47	3.54
4	low					19.11	3.39
4	low					18.22	2.94
4	low					18.22	3.08
4	low					22.35	3.79
4	low					22.72	3.54
4	low					17.48	3.36
4	low					18.79	3.81
4	low					26.05	3.8
4	low					21.03	3.18
4	low					18.27	2.45
4	low					21.07	3.69
4	low					20.69	2.79
4	low					21.2	3.09
4	low					20.18	3.96
4	low					19.05	3.26
4	low					23.63	3.81
4	low					20.74	4.46
4	low	27.55	4.57			17.33	2.79			14.21	2.09
4	low	23.97	5.6			14.44	3.47			12.85	2.03
4	low	25.9	4.57			18.54	3.19			15.06	2.04
4	low	26.42	5.33			16.83	3.64			17.02	2.03
4	low	28.39	4.64			19.2	3.77			15.31	2.24
4	low	25.06	4.15			17.91	3.67			17.87	2.05
4	low	29.05	4.98			24.36	3.34			15.13	2.01
4	low	27.39	5.64			17.9	3.26			15.08	1.87
4	low	27.41	5.01			17.44	2.98			13.78	2.31
4	low	29.43	5.4			16.37	3.21			15.34	2.43
4	low	25.33	4.5			19.44	3.34			16.68	1.78
4	low	25.71	4.51			22.21	3.32			16.85	2.05
4	low	23.1	4.44			19.98	4.05			15.41	1.92
4	low	26.54	5.52			18.45	2.83			15.1	2.11
4	low	23.13	4.5			18.24	3.45			13.85	2.22
4	low	24.81	4.79			22.28	3.2			12.77	2.46
4	low					14.84	3.6			17.02	2.05
4	low					25.56	3.23			13.59	1.72
4	low					19.53	3.69			14.72	1.97
4	low					18.38	2.5			15.17	1.6
4	low					18.16	3.41
4	low					19.62	3.11
4	low					17.13	2.98
4	low					18.55	3.06
4	low					17.5	3.28
4	low					16.74	2.66
4	low					22.2	3.4
4	low					22.59	3.37
4	low					21.86	3.34
4	low					17.88	3.29
6	low	29.04	5.6			14.5	2.88					29.54	4.65
6	low	26.36	4.85			17.01	3.87					34.6	4.18
6	low	28.92	5.8			18.21	3.31					33.64	4.66
6	low	26.47	5.5			19.17	4.93					31.64	5.32
6	low	30.65	6.68			24.21	3.4					30.17	4.82
6	low	25.62	5.33			21.18	5.18					29.69	4.73
6	low	26.3	5.73			17.13	3.93					31.32	4.84
6	low	28	5.57			18.36	4.42					32.51	5.73
6	low	24.81	5.66			19.53	5.04					28.33	5.86
6	low	27.77	5.93			22.69	5.09					30.05	5.31
6	low	31.88	6.6			18.57	4.04					28.17	4.54
6	low	26.83	5.39			21.64	4.69					31.85	4.37
6	low	27.28	5.98			19.41	3.97					31.31	4.17
6	low	26.61	5.95			21.92	3.74					31.8	4.6
6	low	26.4	6.14			21.79	3.65					34.49	3.88
6	low	27.83	6.56			22.32	3.32					29.43	3.63
6	low	24.77	5.48			20.48	4.15					29.83	4.01
6	low	24.5	5.72			15.11	3.78					36.66	4.11
6	low	27.19	5.08			19.62	4.31					31.79	3.32
6	low	29.84	7.16			20.54	4.71					27.85	5.18
6	low	26.56	5.69			20.48	3.97					30.02	5.44
6	low	24.36	3.67			16.67	4.39					37.88	4.32
6	low	31.67	5.07			19.51	5.57					31.03	5.77
6	low	26.85	4.22			19.54	4.09					35.06	4.79
6	low	28.03	6.2			19.36	5.39					32.63	4.77
6	low	24.18	4.44			18.61	4.77					31.38	5.36
6	low	25.35	4.82			20.71	4.85					29.25	4.89
6	low	26.75	5.16			19.14	4.41					29.64	5.89
6	low	23.63	4.9			25.21	3.19					28.09	4.25
6	low	27.47	4.36			18.27	3.63					32.48	3.32
6	low	25.92	5.92			17.69	3.88					29.92	3.98
6	low	28.43	7.11			23.39	4.36					32.06	4.86
6	low	21.87	5.76			22.78	3.21					35.3	3.58
6	low	27.37	5.4			21.27	3.56					32.61	4.8
6	low	29.96	6.28			17.87	3.86					33.01	5.08
6	low	29.6	6.48			22.35	5.92					33.07	3.86
6	low	27.51	7.28			18.85	4.74					33.47	3.71
6	low	25.82	4.48			21.27	5.5					29.15	4.59
6	low	31.15	5.13			20.57	3.85					32	5.82
6	low	25.29	5.06			14.53	3.11					30.24	5.24
6	low	29.75	6.28			23.25	3.71					34.08	5.67
6	low	29.56	6.08			17.24	4.11					34.81	4.43
6	low	25.8	4.53			22.03	3.87					37.23	4.67
6	low	30.49	7.54			20.26	4.23					32.72	4.76
6	low	30.79	5.44			21.05	3.84					32.14	5.78
6	low	31.94	5.75			17.86	4.49					33.49	5.39
6	low	27.7	6.68			19.75	3.16					27.73	6.04
6	low	27.8	5.42			22.74	3.52					28.83	5.03
6	low					21.48	3.14					35.26	4.71
6	low					25.37	4.26					32.74	3.57
6	low					20.94	3.52					31.77	4.66
6	low					22.07	3.42
6	low					23.2	4.26
6	low					21.58	3.94
6	low					18.69	4.14
6	low					19.55	3.93
6	low					18.39	4.23
6	low					19.45	3.38
6	low					23.48	3.28
6	low					19.69	2.5
6	low					18.98	3.75
6	low	28.38	5.24			23.19	4.56
6	low	22.52	4.31			21.21	3.69
6	low	25.05	5.28			21.45	4.06
6	low	28.35	5.81			21.85	3.11
6	low	25.01	5.01			21.22	3.67
6	low	21.21	4.12			24.63	3.73
6	low	23.58	4.29			18.9	4.11
6	low	25.06	4.09			23.57	4.19
6	low	29.55	5.67			24.6	4.09
6	low	27.9	4.5			22.19	3.47
6	low	24.06	4.95			22.45	3.66
6	low	28.3	5.67			23.5	3.69
6	low	25.58	4.26			22.69	3.22
6	low	28.61	4.88			29.7	4.95
6	low	28.85	5.34			17.25	3.75
6	low	28.03	5.23			17.9	3.15
6	low	29.36	5.58			16.8	2.76
6	low					20.48	3.58
6	low					17.61	3.98
6	low					18.01	3.67
6	low					21.58	3.43
6	low					20.45	3.12
6	low					15.76	3.4
6	low					18.69	3.11
6	low					17.72	2.67
6	low					21.9	3.16
6	low					25.4	3.71
6	low					22.91	3.78
6	low					24.83	2.96
6	low					22.23	4.11
6	low					16.25	4.25
6	low					15.52	3.33
6	low					17.69	4.74
6	low					20.44	3.59
6	low					18.07	4.44
6	low					15.81	3.08
6	low					23.11	3.88
6	low					20.46	4.63
6	low					16.9	4.55
6	low					15.63	3.02
6	low					23.03	4.42
6	low					22.79	4.06
6	low					20.76	4.23
6	low					19.8	3.26
6	low					17.23	4.37
6	low					25.52	3.68
6	low					26.38	3.29
6	low					26.63	3.4
6	low					22.65	3.1
6	low					20.11	4.01
6	low					19.59	3.59
6	low					19.98	3.34
6	low					16.8	3.09
6	low					22.92	3.74
6	low					18.43	3.83
6	low					17.2	3.14
6	low					24.94	3.47
6	low					17.58	3.49
6	low					21.26	4.57
7	low	24.47	4.24											18.74	3.92
7	low	26.86	4.16											21.23	3.62
7	low	22.13	4.83											21.39	4.08
7	low	25.57	4.08											22.11	4.17
7	low	24.74	4.31											21.92	3.62
7	low	25.27	4.38											22.55	3.75
7	low	25.1	5											21.62	3.8
7	low	25.74	3.9											20.02	3.97
7	low	25.26	4.26											20.94	4.3
7	low	23.7	3.64											20.89	4.44
7	low	24.78	4.38											19.99	4.63
7	low	28.14	5.15											22.2	3.4
7	low	25.61	4.24											22.8	3.43
7	low	25.15	4.63											21.47	3.61
7	low	24.61	4.34											19.66	2.98
7	low	26.58	4.55											20.34	2.92
7	low	24.73	4.42											19.14	3.2
7	low	25.36	4.38											20.48	3.26
7	low	24.11	4.52											20.8	3.24
7	low	22.41	4.41											22.33	3.69
7	low	25.89	4.31											22.88	3.18
7	low	23.66	3.73											20.23	3.36
7	low	25.29	4.86											20.17	3.19
7	low	26.61	5											21.18	3.29
7	low	25.58	5.06											21.91	3.64
7	low	24.51	4.68											21.04	3.05
7	low	26.61	4.96											21	3.11
7	low	23.97	5.21											22.13	3.29
7	low	23.85	4.69											20.95	3.07
7	low	23.51	4.75											21.06	3.05
7	low	25.06	3.75											20.23	3.02
7	low	25.2	5.51											21.98	4.49
7	low	23.54	4.68											21.66	4.09
7	low	28.55	4.3											24.08	3.98
7	low	19.26	3.86											23.4	4.14
7	low	26.73	4.73											22.83	3.7
7	low	25.97	4.62											22.4	3.44
7	low	22.87	3.73											24.59	3.51
7	low	21.31	3.54											25.53	3.58
7	low	24.28	4.21											25.36	3.29
7	low	25.22	4.23											25.32	3.66
7	low	24.76	4.26											22.31	3.63
7	low	23.64	3.76											19.59	3.16
7	low	24.03	3.96											24.25	3.5
7	low	22.71	4.12											21.51	3.47
7	low	23.9	3.93											23.41	3.7
7	low	22.19	4.33											22.81	3.64
7	low	26	4.35											21.06	4.22
7	low													23.06	4.5
7	low													25.45	3.68
7	low													24.34	3.61
7	low													21.33	3.79
7	low													23.9	3.98
7	low													20.29	3.09
7	low													24.12	3.29
7	low													25.43	3.93
7	low													24.26	3.82
7	low													24.84	3.56
7	low													23.84	3.45
7	low													25.66	4.05
7	low													19.81	3.92
7	low													24.46	3.34
7	low													23.23	5.17
7	low													23.36	4.8
7	low													19.64	3.61
7	low													20.12	3.09
7	low													20.25	3.51
7	low													20.04	3.3
7	low													22.47	3.67
7	low													21.8	3.71
7	low													18.52	3.1
7	low													19.86	3.1
7	low													18.83	2.49
7	low													22.65	3.88
7	low													22.39	4.27
7	low													21.48	4.05
7	low													18.63	3.07
7	low													21.47	3.87
7	low													20.02	3.64
7	low													18.98	3.28
7	low													21.43	3.48
7	low													18.87	3.46
7	low													21.61	3.26
7	low													21.4	3.97
7	low													21	4.06
7	low													23	3.95
7	low													22.73	3.55
7	low													19.01	3.62
7	low													21.23	3.21
7	low													21.62	3.86
7	low													18.49	3.15
7	low													18.7	3.48
7	low													18.31	3.38
7	low													21.85	3.46
7	low													22.05	3.98
7	low													21.3	3.29
7	low													23.54	3.68
7	low													19.91	3.63
7	low													21.58	3.32
7	low													21.2	3.24
7	low													24.25	3.82
7	low													22.48	3.18
7	low													23.48	3.82
7	low													24.54	3.51
7	low													21.44	4.17
7	low													21.74	4.56
7	low													23.47	4.07
7	low													24.23	4.74
7	low													24.9	4.67
7	low													22.26	4.25
7	low													23.04	4.36
7	low													25.64	3.18
7	low													18.85	3.29
7	low													22.32	3.48
7	low													22.29	3.62
7	low													24.56	3.49
7	low													25.04	3.73
7	low													21.92	3.32
7	low													23.49	3.51
7	low													22.87	3.69
7	low													21.43	3.47
7	low													21.28	3.82
7	low													21.01	3.59
7	low													23.3	3.63
1	middle			31.6	4.97	26.33	3.37	21.71	1.63
1	middle			34.74	6.42	24.5	2.99	17.17	1.97
1	middle			26.55	3.87	25.35	3.15	16.2	1.79
1	middle			34.4	5.96	26.78	3.49	19.58	2.02
1	middle			35.47	7.54	27.7	3.34	21.45	2.04
1	middle			35.73	4.96	22.54	3.31	18.49	2.34
1	middle			36.24	5.6	22.37	3.25	16.23	2.34
1	middle			29.17	6.69	26.52	3.18	18.35	2
1	middle			30.94	4.65	24.11	3.41	16.39	1.77
1	middle			27.13	4.72	26.32	3.23	20.59	2.32
1	middle			27.07	4.43	30.42	3.47	21.48	2.1
1	middle			33.02	5.2	28.6	3.23	21.14	2.17
1	middle			31.82	6.73	23.88	3.37	19.42	1.83
1	middle			37.94	5.55	22.22	3.67	17.43	2.27
1	middle			28.13	4.91	23.59	2.73	22.26	2.35
1	middle			34.52	7.7	22.96	3.06	19.43	2.33
1	middle			36.61	5.83	26.41	3.46	19.21	2.43
1	middle			27.58	4.96	26.17	2.93	17.24	2.48
1	middle			30.16	4.4	29.48	4.08	20.82	2.45
1	middle			31.86	5.48	24.24	3.4	14.86	1.99
1	middle			34.1	5.5	25.39	3.61	20.71	2.13
1	middle			27.37	4.34	22.39	3.91	20.75	2.06
1	middle			35.18	5.56	26.16	3.54	24.14	2.08
1	middle			34.31	5.46	20.65	3.11	16.68	1.93
1	middle			28.94	5.72	22.57	3.31	19.57	2.16
1	middle			34.96	5.85	28.11	3.25	19.76	2.37
1	middle			34.16	5.47	22.88	3.05	17.9	2.25
1	middle			30.54	5.03	28.9	3.62	21.85	2.19
1	middle			28.29	4.26	23.09	3.82	19.93	2.03
1	middle			35.13	5.51	25.12	3.62	16.61	2.28
1	middle			34.86	5.82	25.7	3.07	20.57	2.49
1	middle			33.84	7.21	26.01	3.2	19.19	2.46
1	middle			34.33	5.8	24.54	3.49	18.64	2.51
1	middle			30.4	5.21	29.99	3.21	19.35	2.22
1	middle			29.14	6.56	22.87	2.98	18.9	2.28
1	middle			37.35	4.86	28.21	3.34	21.92	2.01
1	middle			39.62	5.87	25.68	3.16	19.07	2.48
1	middle			29.39	4.59	25.22	3.52	18.02	1.97
1	middle			33.67	5.01	25.17	3.66	22.32	2.39
1	middle			33.46	5.65	28.62	4.05	21.28	2.08
1	middle			33.38	7.65	22.17	3.27	17.28	2
1	middle			31.43	7.18	21.75	3.17	17.6	1.95
1	middle			36.14	5.81	24.45	3.62	17.19	1.93
1	middle			30.46	5.37	24.32	3.53	21.08	2.44
1	middle			30.43	5.09	27.14	3.78	19.06	2.38
1	middle			31.02	5.19	26.82	3.08	18.5	1.66
1	middle			29.44	4.31	29.24	4.38	16.81	1.59
1	middle			29.42	7.56	26.59	3.18	18.6	2.14
1	middle			32.08	5.11	28.11	3.74	19.05	1.89
1	middle			28.3	5.01	28.23	3.41	22.3	2.51
1	middle			31.39	5.38	29.58	3.39	20.98	2.08
1	middle			33.88	4.79			15.77	1.81
1	middle			28.79	5.42			15.82	2.11
1	middle			34.36	5.59			15.96	1.81
1	middle			31.94	6.49			21.45	2.22
1	middle			33.5	5.46			20.41	2.27
1	middle			26.99	4.72			19.79	2.49
1	middle			31.99	5.23			19.18	1.97
1	middle			33.48	6.83			16.32	1.78
1	middle			35.01	7.02			18.37	1.99
1	middle			31.09	6.08			23.35	2.75
1	middle			32.94	5.82			19.71	2.35
1	middle			32.2	6.75			15.69	1.92
1	middle			31.6	5.47			18.78	2.41
1	middle			32.47	5.88			19.7	2.57
1	middle			37.27	6.79			19.87	2.3
1	middle			37.02	6.97			22.43	1.93
1	middle			34.47	6.52			21.03	2.47
1	middle			35.01	6.06			17.5	1.8
1	middle			34.57	6.59			19.99	2.09
1	middle			36.1	6.28			19.94	2.27
1	middle			35.42	8.18			18.83	2.48
1	middle			34.4	6.7			18.68	2.62
1	middle			39.35	6.02			18.98	2.18
1	middle			35.45	6.72			18.74	2.08
1	middle			35.34	5.96			17.16	2.29
1	middle			28.92	5.77			15.98	2
1	middle			35.41	8.14			17.3	2.15
1	middle			29.15	6.6			20.7	2.12
1	middle			29.17	5.68			16.12	2.3
1	middle			33.02	7.75			21.87	2.31
1	middle			32.1	6.81			21.43	2.28
1	middle			37.03	7.72			19.23	2.12
1	middle			33.75	6.13			21.72	2.31
1	middle			33.87	6.4			17.85	1.94
1	middle			35.87	7.75			25.35	2.19
1	middle							24.04	2.78
1	middle							17.22	2.13
1	middle							16.53	2.18
1	middle							18.34	2.44
1	middle							16.41	2.12
1	middle							18.34	2.19
1	middle							24.75	2.32
1	middle							15.38	1.86
1	middle							18.27	2.05
1	middle							19.78	2.24
1	middle							19.65	2.45
1	middle							20.38	2.53
1	middle							21.33	2.69
1	middle							16.83	2.19
1	middle							14.8	1.86
1	middle							15.07	1.65
1	middle							18.15	2.17
1	middle
1	middle
1	middle
1	middle
1	middle
1	middle
1	middle
1	middle
1	middle
1	middle
1	middle
1	middle
1	middle
1	middle
1	middle
1	middle
1	middle
4	middle			34.6	6.21	25.98	4.37					29.47	3.2
4	middle			32.15	6.02	25.76	4.27					32.37	4.1
4	middle			34.92	6.35	23.3	3.62					30.98	4.11
4	middle			34.36	6.6	26.44	3.48					34.42	4.39
4	middle			35.58	6.16	23.17	4					32.22	4.01
4	middle			34.01	5.07	27.53	3.99					30.58	3.39
4	middle			35.65	7.03	25.74	3.04					30.28	3.3
4	middle			28.32	5.2	23.27	3.51					32.82	5.5
4	middle			31.27	6.44	26.5	3.14					31.93	2.97
4	middle			36.7	4.88	25.32	3.43					28.78	3.9
4	middle			34.42	6.06	23.72	3.49					34.37	4.13
4	middle			34.61	7.08	23.86	3.79					34.08	4.66
4	middle			33.7	4.88	24.57	3.65					31.6	5.31
4	middle			34.17	5.54	22.84	3.74					31.93	3.46
4	middle			35.56	6.17	22.36	3.13					30.46	4.52
4	middle			33.65	4.82	20.82	3.18					33.04	4.59
4	middle			34.3	5.11	24.89	3.18					32.89	4.21
4	middle			32.3	4.66	25.27	3.44					31.85	3.5
4	middle			33.11	5.29	23.7	3.05					33.4	4.37
4	middle			34.08	5.42	25.04	3.6					31.4	2.98
4	middle			35.07	5.32	23.82	3.2					32.9	3.58
4	middle			30.95	5.21	25.62	4.3					31.54	3.5
4	middle			32.32	4.46	22.25	3.6					32.62	3.94
4	middle			34.57	4.67	23.46	4.02					31.91	3.29
4	middle			34.35	5.37	23.83	4.48					30.81	3.2
4	middle			33.53	5.29	19.4	3.51					35.03	4.17
4	middle			36.84	4.71	22.41	4.15					32.15	3.13
4	middle			34.51	6.18	23.65	3.79					32.08	3.37
4	middle			32.78	6.23	22.12	2.98					30.82	3.83
4	middle			38.29	6.37	22.86	3.76					30.55	3.47
4	middle			32.82	5.57	19.24	3.54					30.9	3.87
4	middle			35.72	5.15	21.54	3.26					32.45	4.05
4	middle					20.83	2.95					31.4	5.01
4	middle					21.39	3.33					26.35	3.54
4	middle					23.19	2.83					37.45	3.89
4	middle					24.24	3.38					31.45	4.81
4	middle					25.71	2.4					28.68	2.86
4	middle					26.64	2.57					32.76	3.97
4	middle					26.19	2.59					31.63	3.48
4	middle					25.31	2.77					31.81	4.27
4	middle					21.5	3.51					34.17	4.17
4	middle					17.06	3.38					32.78	3.55
4	middle					19.94	3.39					30.24	5.9
4	middle					27.34	3.61					31.81	2.58
4	middle					19.37	2.91					34.54	3.53
4	middle					19.5	3.5					34.7	3.92
4	middle					18.29	4.63					29.79	3.82
4	middle					25.67	4.26					30.86	3.3
4	middle					26.17	3.9					33.17	4.76
4	middle					23.57	3.54					33.77	4.23
4	middle					21.49	3.98					31.81	4.34
4	middle					21.73	2.57					33.25	3.82
4	middle					20.7	3.24					30.74	4.69
4	middle					22.74	3.44					35.66	4.63
4	middle					23.06	3.31					35.94	2.78
4	middle					22.29	3.52					31.9	3.73
4	middle					25.18	4.71					31.69	4.53
4	middle					25.36	3.92					27.39	3.93
4	middle					23.27	3.96					29.77	3.28
4	middle					23.86	4.06					34.74	2.99
4	middle					24.31	3.97					33.22	3.2
4	middle					27.94	3.6					28.88	3.38
4	middle					23.69	4.32					27.91	4.58
4	middle					21.21	3.14					31.56	3.83
4	middle					23.76	3.52					28.25	4.39
4	middle					27.34	4.15					30.97	3.96
4	middle					29.2	4.13					32.17	3.99
4	middle					25.07	3.66					24.65	2.81
4	middle					26.35	3.64					37.2	4.45
4	middle					25.43	3.81					33.31	3.1
4	middle					26.99	3.77					28.23	4.28
4	middle					17.85	2.89					29.28	4.33
4	middle					25.44	3.97					36.03	4.26
4	middle					23.44	3.16					35.31	3.72
4	middle					25.58	3.38					31.32	3.73
4	middle					26.78	3.64					32.2	3.61
4	middle					24.98	2.53					31.34	3.17
4	middle					21.95	2.56					31.83	3.65
4	middle					25.23	2.99					31.16	5.07
4	middle					27.88	3.82					32.42	3.49
4	middle					27.86	3.86					38.34	3.56
4	middle					22.82	3.59					32.93	4.61
4	middle					24.97	3.04					30.42	4.01
4	middle											31.8	4.7
4	middle											31.89	3.94
4	middle											26.85	3.02
4	middle											29.25	3.88
4	middle											31.27	3.56
6	middle					20.93	3.44					33.5	5.49
6	middle					24.84	4.68					31.36	5.66
6	middle					24.65	4.12					34.08	4.35
6	middle					23.93	4.23					34.01	5.42
6	middle					28.31	4.53					34.01	4.55
6	middle					22.92	4.51					33.83	5.41
6	middle					28.05	4.87					36.79	5.12
6	middle					25.48	4.02					34.54	5.29
6	middle					23.26	3.6					35.59	4.31
6	middle					25.83	5.58					31.2	5.2
6	middle					25.46	3.86					29.62	5.81
6	middle					26.83	3.77					33.42	4.81
6	middle					23.93	3.5					29.53	6.03
6	middle					25.41	3.73					34.45	4.76
6	middle					25	3.99					33.62	5.14
6	middle					25.77	3.2					37.13	5.04
6	middle					23.6	3.67					35.87	4.81
6	middle					22.86	3.41					32.67	5.68
6	middle					25.36	3.57					23.83	4.55
6	middle					23.89	3.73					34.16	5.19
6	middle					26.83	3.92					33.02	4.39
6	middle					23.14	3.34					30.87	4.35
6	middle					24.06	3.42					33.84	5.25
6	middle					25.54	3.62					33.99	4.02
6	middle					28.15	3.78					33.23	4.67
6	middle					25.31	3.71					33.46	5.69
6	middle					26.51	4.23					33.89	4.83
6	middle					25.33	3.45					36.15	4.08
6	middle					26.53	3.5					35.95	3.51
6	middle											33.99	4.79
6	middle					26.16	3.59					32.66	4.99
6	middle					25.28	4.35					34.94	4.87
6	middle					21.5	3.17					33.17	5.43
6	middle					27.23	3.57					33.82	4.75
6	middle					21.66	3.16					30.98	4.82
6	middle					24.03	3.51					29.01	5.1
6	middle					23.79	3.79					31.13	4.56
6	middle					24.78	3.24					31.7	4.83
6	middle					25.03	3.87					31.39	4.51
6	middle					27.58	4.05					34.96	4.05
6	middle					24.65	3.48					31.55	5.32
6	middle					28.73	4.05					29.34	4.72
6	middle					23.34	3.32					35.34	4.13
6	middle					17.02	3.37					32.24	4.8
6	middle					29.31	4.52					37.65	4.68
6	middle					25.71	3.74					33.91	4.35
6	middle					24.29	3.75					35.61	4.56
6	middle					25.06	3.58					32.58	5.5
6	middle					32.26	4.04					33.17	5.36
6	middle					26.46	3.34					36.25	4.97
6	middle					25.27	3.51					32.18	3.4
6	middle					28.19	3.99					32.34	4.57
6	middle					23.88	3.51					30.37	5.28
6	middle					27.17	4.45					30.62	5.61
6	middle					26.62	4.81					24.64	3.4
6	middle					25.55	4.12					34.95	4.04
6	middle					25.94	3.87					31.45	4.09
6	middle					24.89	4.16					29.82	3.48
6	middle					28.37	4.39					30.4	4.14
6	middle					27.29	4.74					32.12	3.79
6	middle					24.93	3.38					35.15	4.31
6	middle					25.3	3.48					33.16	4.36
6	middle					25.41	3.45					31.43	4.97
6	middle					26.56	3.93					33.72	3.99
6	middle					24.2	3.31					32.41	3.79
6	middle											31.22	5.12
6	middle											33.29	3.36
6	middle											32.18	4.02
6	middle											30.99	4.23
6	middle											33.59	4.59
6	middle											32.79	4.5
6	middle											31.51	5.07
6	middle											30.56	4.62
6	middle											30.87	4.34
6	middle											31.79	3.76
6	middle											32.53	4.22
6	middle											33.16	4
6	middle											30.17	4.62
6	middle											31.01	3.85
6	middle											32.91	4.48
6	middle											32.24	4.44
6	middle											29.47	4.21
6	middle											36.93	4.36
6	middle											34.16	4.56
6	middle											33.97	3.71
6	middle											34.99	3.96
6	middle											31.09	3.98
6	middle											32.49	4.96
6	middle											34.66	5.55
6	middle											33.99	3.51
6	middle											35.19	4.67
6	middle											36.18	3.81
6	middle											35.9	3.29
6	middle											34.91	4.31
6	middle											34.58	4.81
6	middle											36.72	4.61
6	middle											35.04	4.53
6	middle											32.41	4.31
6	middle											37.75	4.94
6	middle											37.23	5.48
6	middle											35.63	4.52
6	middle											36.44	4.65
6	middle											32.48	5.11
6	middle											31.63	4.19
6	middle											34.18	4.31
6	middle											35.91	5.04
6	middle											34.24	3.96
6	middle											32.43	3.97
6	middle											36.56	3.99
6	middle											30.78	4.15
6	middle											36.96	4.42
6	middle											34.63	4.8
6	middle											36.38	5.44
6	middle											35.46	4.39
6	middle											33.91	4.43
6	middle											33.52	4.74
6	middle											36.05	3.23
6	middle											33.26	3.4
6	middle											35.11	3.96
6	middle											34.37	3.43
7	middle													22.07	3.57
7	middle													25.22	3.52
7	middle													22.7	3.23
7	middle													22.49	3.64
7	middle													20.02	3.73
7	middle													24.84	3.81
7	middle													23.67	3.89
7	middle													21.46	3.28
7	middle													20.08	3.41
7	middle													22.16	3.7
7	middle													23.2	3.21
7	middle													22.44	3.52
7	middle													23.74	3.74
7	middle													22.4	3.92
7	middle													22.21	3.22
7	middle													22.42	3.78
7	middle													22.03	3.77
7	middle													18.72	4
7	middle													22.12	3.46
7	middle													22.34	3.71
7	middle													22.87	3.85
7	middle													21.13	3.87
7	middle													22.36	3.89
7	middle													20.7	3.37
7	middle													25.35	3.6
7	middle													20.89	3.35
7	middle													20.71	3.87
7	middle													23.2	3.35
7	middle													21.87	3.76
7	middle													22.91	3.86
7	middle													24.8	4.37
7	middle													22.95	4.32
7	middle													22.57	3.81
7	middle													22.42	3.62
7	middle													23.33	3.91
7	middle													22.88	4.2
7	middle													23.97	3.23
7	middle													22.33	3.61
7	middle													24.03	4.44
7	middle													26.72	4.19
7	middle													23.95	4.19
7	middle													22.57	3.91
7	middle													24.5	3.91
7	middle													23.89	3.87
7	middle													23.24	3.5
7	middle													22.91	3.5
7	middle													22.89	3.65
7	middle													23.26	3.49
7	middle													22.59	3.48
7	middle													23.62	3.76
7	middle													23.46	3.78
7	middle													21.34	3.43
7	middle													20.14	3.73
7	middle													21.48	3.29
7	middle													23.17	4.01
7	middle													23.3	3.3
7	middle													22.66	3.48
7	middle													23.92	4.02
7	middle													23.57	3.73
7	middle													21.68	3.2
7	middle													21.69	3.32
7	middle													22.02	3.83
7	middle													23.13	3.35
7	middle													24.42	3.4
7	middle													22.95	4.27
7	middle													23.01	3.59
7	middle													24.47	3.44
7	middle													23.83	3.51
7	middle													22.71	3.54
7	middle													23.26	3.65
7	middle													22.41	3.66
7	middle													25.22	3.5
7	middle													25.47	4.26
7	middle													23.11	3.37
7	middle													23.42	3.17
7	middle													22.17	4.18
7	middle													23.71	3.99
7	middle													24.18	3.66
7	middle													23.86	3.72
7	middle													24.55	3.46
7	middle													21.89	3.95
7	middle													22.98	3.64
7	middle													23.11	3.65
7	middle													22.34	3.68
7	middle													21.96	3.68
7	middle													20.53	3.56
7	middle													23.99	3.22
7	middle													23.16	3.78
7	middle													24.22	3.53
7	middle													22.94	3.01
7	middle													24.54	3.37
7	middle													23.77	3.81
7	middle													24.17	3.86
7	middle													22.59	3.74
7	middle													23.85	3.27
7	middle													23.88	3.5
7	middle													25.11	2.87
7	middle													23.96	3.41
7	middle													24.98	3.79
7	middle													24.98	3.55
7	middle													20.86	3.63
7	middle													22.79	3.14
7	middle													25.06	3.62
7	middle													22	3.17
7	middle													18.11	3.24
7	middle													19.57	2.78
7	middle													24.47	3.74
7	middle													21.08	3.7
7	middle													24.52	3.51
7	middle													21.62	4.3
7	middle													26.15	4.07
7	middle													21.03	3.11
7	middle													25.05	3.52
7	middle													23.31	3.86
7	middle													24.33	3.71
7	middle													22.96	3.77
7	middle													25.31	3.66
7	middle													25.11	3.33
7	middle													26.17	3.4
7	middle													26.43	3.45
1	high			34	5.87			16.24	2.23
1	high			28.89	5.08			18.36	2.27
1	high			30.31	6.23			17.02	2.09
1	high			31.27	6.15			21.08	2.72
1	high			33.02	5.87			19.98	2.28
1	high			34.14	6.02			20.88	2.27
1	high			36.07	5.77			17.7	2.04
1	high			33.81	5.62			19.98	2.22
1	high			25.37	5.13			17.64	2.12
1	high			30.32	5.85			26.09	2.5
1	high			23.37	4.22			18.8	2.17
1	high			27.34	5.12			20.58	2.19
1	high			33.65	6.63			17.52	2.34
1	high			34.26	7.03			18.42	2.22
1	high			33.17	7.4			21.07	2
1	high			32.32	6.52			18.63	2.05
1	high			31.36	8.24			21.71	2.74
1	high			29.48	6.29			21.45	2.29
1	high			29.46	6.55			19.63	1.95
1	high			32.35	6.89			17.76	2.14
1	high			32.27	7.57			17.75	1.98
1	high			33.15	6.71			21.48	1.52
1	high			30.01	5.71			18.93	1.95
1	high			29.79	5.84			20.18	2.08
1	high			27.13	4.61			20.45	2.69
1	high			26.09	5.74			18.96	2.03
1	high			30.45	7.14			21.59	1.93
1	high			31.55	6.69			18.81	2.05
1	high			28.8	5.65			19.7	1.95
1	high			32.06	7.42			21.75	2.27
4	high					30.52	5.72
4	high					31.05	4.65
4	high					27.58	4.96
4	high					28.34	5.07
4	high					28.24	5.51
4	high					27.32	4.88
4	high					25.11	4.72
4	high					29.01	4.08
4	high					29.26	4.96
4	high					28.16	4.56
4	high					30.9	3.28
4	high					30.81	3.74
4	high					29.89	3.64
4	high					28.28	4.53
4	high					25.87	3.45
4	high					30.3	5.88
4	high					28.77	4.87
4	high					31.36	5.95
4	high					28.1	5.29
4	high					30.32	5.27
4	high					30.31	6.05
4	high					22.05	4.6
4	high					32.11	5.98
4	high					31.7	4.96
4	high					29.88	4.75
4	high					30.45	4.13
4	high					28.33	4.4
4	high					31.97	4.22
4	high					29.48	3.95
4	high					29.33	3.65
4	high			44.77	7.72	21.41	3.21
4	high			42.65	6.14	24.46	3.31
4	high			44.54	6.52	22.56	3.44
4	high			43.63	7.27	22.3	2.88
4	high			42.63	6.26	21.56	2.98
4	high			42.53	5.83	21.52	3.31
4	high			41.97	6.43	22.6	3.07
4	high			43.31	7.21	20.49	2.5
4	high			42.85	6.16	23.48	3.83
4	high			45.19	6.41	22.13	2.6
4	high			44.33	7.21	23.33	3.22
4	high			42.13	6.45	24.81	3.18
4	high			47.16	6.59	23.21	2.68
4	high			45.7	7.94	22.58	3.28
4	high			43.53	6.72	23.51	3.21
4	high			42.19	5.85	21.92	3.09
4	high			41.71	5.71	23.04	2.88
4	high			44.29	7.52	24.99	3.29
4	high			46.5	7.48	21.21	2.8
4	high			45.25	7.55	23.74	2.93
4	high			43.47	6.48	22.21	3.41
4	high			44.88	7.89	21.82	2.95
4	high			46.93	7.45	22.34	3.21
4	high			45.95	8.17	23.72	3.11
4	high			44.71	6.68	21.05	3.16
4	high			44.02	7.53	22.84	2.83
4	high			45.14	8.26	23.3	3.75
4	high			44.95	6.89	22.58	3.98
4	high			44.63	6.37	23.19	3.1
4	high					23.49	3.35
4	high					22.68	3.12
4	high					22.74	3.24
4	high					20.09	3.15
4	high					25.68	3.02
4	high					23.67	3.11
4	high					21.88	3.17
4	high					22.42	3.45
4	high					19.95	3.07
4	high					23.49	3.29
4	high					20.89	2.28
4	high					21.33	2.85
4	high					24.56	3.49
4	high					24.87	2.83
4	high					21.52	2.86
4	high					23.11	3.44
4	high					23.39	3.35
4	high					24.65	3.25
4	high					24.08	3.5
4	high					21.22	3.45
4	high					21.89	3.12
4	high					20.22	2.63
4	high					23	3.27
4	high					23.1	3.45
4	high					25.09	3.63
4	high					21.78	3.05
4	high					22.98	2.73
4	high					25.35	3.23
4	high					24.36	2.96
4	high
4	high
6	high					29.41	4.95					28.95	4.97
6	high					25.92	3.67					30.04	4.9
6	high					26.27	3.6					32.81	3.86
6	high					18.36	3.65					34.83	4.31
6	high					23.68	3.58					34.78	4.31
6	high					19.1	3.97					32.96	4.84
6	high					21.47	2.62					31	4.94
6	high					15.38	3.31					32.5	5.28
6	high					22.79	3.89					30.2	4.88
6	high					19.82	4.28					34.11	3.32
6	high					25.67	4.05					29.22	4.21
6	high					23.2	3.69					30.77	5.26
6	high					22.94	3.04					31.83	4.39
6	high					18.62	4.23					34.11	4.23
6	high					26.28	2.87					29.14	5.46
6	high					20.99	4.03					27.06	5.14
6	high					19.6	2.96					35.13	4.2
6	high					19.81	3.17					30.92	3.85
6	high					21.59	3.51					29.73	3.75
6	high					24.35	3.12					35.12	2.99
6	high					23.86	3.43					34.02	3.65
6	high					29.45	3.91					33.94	3.57
6	high					23.77	3.01					30.67	5.03
6	high					24.09	3.92					35.76	4.74
6	high					27.08	3.64					36.14	3.9
6	high					22.87	3.36					37.62	3.51
6	high					22.17	3.39					33.71	3.27
6	high					25.02	3.48					34.79	2.96
6	high					23.91	3.29					36.31	4.28
6	high					25	3.66					35.77	4.57
6	high					27.47	3.49	14.3	2.22			34	4.61
6	high					25.75	3.5	16.94	2.16			32.34	5.14
6	high					26.18	4.28	16.44	2.49			38.57	4.78
6	high					23.66	4.79	16.89	2.35			33.9	4.32
6	high					22.86	3.24	15.38	2.39			33.33	4.78
6	high					26.05	4.46	17.97	1.97			35.06	5.25
6	high					24.86	4.26	22.01	2.34			35.53	5.49
6	high					20.51	3.29	16.86	2.19			33.11	4.35
6	high					27.95	3.52	16.2	1.43			30.51	3.76
6	high					29.21	3.51	18.82	1.98			30.53	3.6
6	high					26.15	4.5	17.64	1.92			30.72	4.37
6	high					24.56	3.79	17.12	2.03			32.85	4.98
6	high					22.92	3.69	17	2.05			32.24	4.99
6	high					24.34	3.55	15.26	1.9			33.65	4.83
6	high					23.42	3.37	15.89	1.93			30.67	4.23
6	high					28.07	4.01	13.59	2.13			32.91	3.42
6	high					28.66	3.88	16.46	2.1			33.54	4.29
6	high					23.01	3.53	13.33	2.17			35.4	4.67
6	high					22.3	3.58	17.03	2.35			32.04	3.63
6	high					24.54	3.62	17.31	2.38			35.08	3.93
6	high					22.8	3.76	15.62	2.04			32.71	4.42
6	high					22.81	3.1	17.64	2.06			34.21	4.64
6	high					29.41	4.07	17.62	2.31			34.69	5.28
6	high					25.69	4.07	15.35	2.05			33.47	5.51
6	high					24.78	3.52	18.74	1.81			33.39	5.09
6	high					20.65	2.89	14.28	2.23			32.2	3.76
6	high					24.74	3.47	16.37	2			33.23	3.5
6	high					22.55	3.41	17.86	2.05			32.79	3.88
6	high					24.28	3.24	17.16	1.67			35.94	3.75
6	high					24.02	3.79	15.29	2.33			34.38	4.98
6	high					24.93	3.23	18.14	2.56			33.7	4.43
6	high					26.55	3.54	16.85	2.08			30.91	5.32
6	high					22.65	3.44	16.38	1.86			30.8	4.32
6	high					26.15	3.91	16.15	2.03			35.08	4.76
6	high					23.35	3.78	18.51	1.73			35.53	4.03
6	high					25.37	3.33	19.56	2.03			32.62	3.94
6	high					24.34	3.34	16.69	2.06			29.54	3.8
6	high					24.18	3.37	18.45	1.95			35.08	4.92
6	high					26.32	4.29	18.03	1.93			37.47	4.44
6	high					22.98	3.57	15.92	2.22			37.51	4.53
6	high					26.88	4.32					36.57	4.07
6	high					23.03	3.81					37.61	4.7
6	high					25.36	3.79					36.12	4.05
6	high					26.04	4.88					34.77	3.99
6	high					24.34	4.4					33.39	4.77
6	high					25.79	4.53					35.42	4.37
6	high					28.34	4.69					31.31	3.88
6	high					21.84	4.17					35.77	3.15
6	high					25.93	3.87					34.96	3.62
6	high					23.15	3.45					32.25	3.25
6	high					27.92	4.5					34.19	4.25
6	high					25.29	4.03					34.43	4
6	high					24.63	3.37					32.87	3.64
6	high					21.43	3.29					34.48	3.4
6	high					23.57	3.07					31.09	3.78
6	high					25.39	4.09					34.44	3.69
6	high					24.49	3.25					37.59	3.87
6	high					26.2	4.81					35.36	5.15
6	high					22.89	3.34					37.7	5.29
6	high					26.51	3.37					33.76	3.77
6	high					24.37	3.64					37.35	4.62
6	high					21.79	3.29					38.74	4.21
6	high											34.07	3.77
6	high											36.72	3.87
6	high											37.35	4.36
6	high											34.92	4.91
6	high											36.01	3.63
6	high											34.96	4.24
6	high											33.72	5.17
6	high											35.6	3.91
6	high											35.04	4.59
6	high											39.06	3.95
7	high													23.29	3.42
7	high													23.97	3.85
7	high													22.83	3.73
7	high													23.41	3.69
7	high													22.67	3.58
7	high													25.85	4
7	high													22.16	3.66
7	high													24.6	4.37
7	high													23.87	3.84
7	high													24.95	3.77
7	high													22.95	3.8
7	high													25.01	3.14
7	high													24.3	3.96
7	high													23.46	3.44
7	high													23.41	4
7	high													22.16	3.77
7	high													22.6	3.86
7	high													23.65	4.09
7	high													20.95	3.67
7	high													24.09	3.82
7	high													23.91	4.22
7	high													21.1	3.6
7	high													22.83	4.08
7	high													22.55	3.8
7	high													23.92	3.56
7	high													22.69	4.03
7	high													25.46	3.68
7	high													22.68	3.66
7	high													24.41	4.14
7	high													22.27	3.68
7	high													24.59	3.74
7	high													22.65	3.45
7	high													24.96	4.11
7	high													23.38	4.03
7	high													23.41	4.74
7	high													24.22	4.56
7	high													25.17	4.17
7	high													21.88	4.97
7	high													23.17	3.67
7	high													23.11	4.37
7	high													23.63	4.58
7	high													23.7	4.2
7	high													23.78	3.95
7	high													23.33	4.12
7	high													24.29	3.96
7	high													23.77	3.46
7	high													24.41	3.97
7	high													24.69	3.67
7	high													24.78	3.63
7	high													23.48	3.57
7	high													25.62	3.63
7	high													21.31	3.3
7	high													23.23	3.48
7	high													24.24	3.4
7	high													22.52	4.17
7	high													22.7	3.8
7	high													22.99	3.85
7	high													24.53	3.51
7	high													23.47	3.82
7	high													24.48	3.72
7	high													21.27	3.85
7	high													23.4	3.67
7	high													19.3	3.78
7	high													24.46	3.8
7	high													24.45	3.6
7	high													21.32	4.1
7	high													21.53	3.07
7	high													24.01	3.75
7	high													21.98	3.47
7	high													17.39	3.24
7	high													22.95	3.61
7	high													21.91	3.24
7	high													24.33	4.11
7	high													24.87	3.49
7	high													21.97	3.91
7	high													24.77	3.79
7	high													20.76	3.54
7	high													20.79	3.35
7	high													26.09	3.57
7	high													21.14	4.19
7	high													22.76	3.87
7	high													22.39	3.67
7	high													22.4	4.51
7	high													23.28	3.4
7	high													23.76	3.67
7	high													23.37	3.22
7	high													25.49	3.92
7	high													21.64	4.01
7	high													21.62	3.73
7	high													24.37	4.18
7	high													23.28	4.05
7	high													23.3	3.39
7	high													23.71	3.88
7	high													23.33	3.01
7	high													24.88	3.75
7	high													25.49	3.52
7	high													25.57	3.79
7	high													23.16	3.29
7	high													24.6	3.62
7	high													23.6	3.27
7	high													22.98	3.57
7	high													23.38	3.81
7	high													24.62	3.82
7	high													24.51	3.03
7	high													24.5	4.01
7	high													24.5	3.77
7	high													23.08	3.56
7	high													21.35	2.69
7	high													23.97	3.39
7	high													24.83	3.24
7	high													24.58	3.81
7	high													25.65	3.59
7	high													23.66	3.38
7	high													25.4	3.34
7	high													23.23	3.05
7	high													22.74	3.57
7	high													22.44	3.23
7	high													24.43	3.42
7	high													24.18	3.55
7	high													23.4	3.43
1	high							16.29	2.27					25.57	3.13
1	high							25.45	2.5
1	high							23.6	2.52
1	high							18.23	1.89
1	high							18.96	2.14
1	high							16.63	1.73
1	high							16.96	1.86
1	high							16.85	2.02
1	high							17.85	1.93
1	high							20.15	2.16
1	high							23.47	2.37
1	high							17.18	1.98
1	high							18.56	1.77
1	high							18.6	2.05
1	high							17.52	2.5
1	high							17.24	1.58
1	high							16.11	1.87
1	high							17.76	2.08
1	high							16.91	2.05
1	high							18.86	1.97
1	high							17.18	1.89
1	high							20.13	2.64
1	high							16.3	2.18
1	high							17.89	2.23
1	high							17.32	2.07
1	high							16.73	2.29
1	high							19.48	2.15
1	high							19.88	2.06
1	high							19.6	1.95
1	high							24.3	2.08
1	high							22.21	2.36
1	high							20.41	2.24
1	high							23.42	2.68
1	high							23.77	2.25
1	high							18.15	1.92
1	high							21.27	2.16
1	high							19.99	2.04
1	high							20.05	2.37
1	high							21.37	2.2
1	high							21.89	2.03
1	high							21.72	2.45
1	high							23.3	2.35
1	high							20.91	2.11
1	high							20.68	2.27
1	high							23.05	2.21
1	high							20.29	2.35
1	high							20.44	2.15
1	high							20.76	2.19
1	high							16.48	2.27
1	high							18.43	2.18
1	high							20.91	2.31
1	high							19.33	2.07
1	high							22.81	2.14
1	high							23.28	2.2
1	high							23.84	2.58
1	high							19.85	2.34
1	high							23.99	2.54
1	high							24.26	2.7
1	high							19.49	2.55
1	high							19.56	2.31
4	high					22.09	3.31
4	high					22.5	3.2
4	high					23.13	3.11
4	high					19.95	3.03
4	high					25.27	3.35
4	high					23.41	3.1
4	high					21.75	2.95
4	high					22.09	3.26
4	high					19.82	2.93
4	high					23.62	3.09
4	high					20.65	2.67
4	high					21.62	2.86
4	high					24.62	3.58
4	high					25.09	3.3
4	high					21.17	2.86
4	high					23.04	3.29
4	high					23.29	3.29
4	high					24.95	3.37
4	high					24.27	3.49
4	high					21.17	3.28
4	high					22.09	3.25
4	high					20.29	2.75
4	high					23.23	3.53
4	high					22.71	3.41
4	high					25.07	3.46
4	high					22.1	2.94
4	high					22.79	2.89
4	high					25.15	3.55
4	high					24.4	3.35
4	high
1	high			36.74	5.95			21.87	2.33
1	high			34.41	5.4			17.43	1.85
1	high			28.64	6.16			17.51	2.52
1	high			31.9	4.85			15.63	1.73
1	high			28.37	5.07			17.65	2.03
1	high			32.93	6.48			16.17	2.13
1	high			30.31	6.46			22.59	2.21
1	high			29.15	5.69			16.79	2.22
1	high			30.26	6.81			16.32	2.1
1	high			27.78	5.65			17.59	2.45
1	high			34.75	6.75			19.58	1.82
1	high			32.06	5.73			16.88	2.15
1	high			28.94	5.73			15.95	2.06
1	high			31.88	6.28			21.05	2.32
1	high			27.75	6.34			20.49	2.02
1	high			29.38	5.58			18.05	2.45
1	high			31.3	5.3			20.37	2.35
1	high			31.28	5.24			22.8	2.72
1	high			26.64	5.21			20.13	1.97
1	high			28.57	5.55			18.57	2.07
1	high			29.1	6.55			22.84	2.13
1	high			34.3	6.22			19.29	1.96
1	high			28.22	4.78			19.36	2.12
1	high			31.69	5.09			16.4	2.19
1	high			33.71	6.64			18	2.63
1	high			28.31	4.48			17.61	1.86
1	high			28.92	4.12			18.84	2.6
1	high			30.75	6.82			19.69	1.96
1	high			28.97	6.41			22.9	2.5
1	high			28.5	6.77			19.51	2.28
labial tentacles
Specimen		atrich_l	atrich_w	mbI_l	mbI_w	mbII_l	mbII_w	mbIII_l	mbIII_w	mbVII_l	mbVII_w
1	middle			37.26	6.47			21.21	2.96
1	middle			41.14	7.7			26.14	2.32
1	middle			42.67	6.66			23.45	2.31
1	middle			32.5	4.73			19.19	2.05
1	middle			43.45	6.56			26.39	2.74
1	middle			40.13	6.93			24.01	3.1
1	middle			34.24	5.1			28.41	2.71
1	middle			34.35	5.78			21.72	3.02
1	middle			41.24	6.2			26.2	2.56
1	middle			32.89	5.45			20.75	2.17
1	middle			32.48	5.52			26.04	2.52
1	middle			32.52	6.6			27.69	2.78
1	middle			42.17	6.65			26.45	3.34
1	middle			34.9	6.48			24.72	2.74
1	middle			30.06	4.71			24.36	2.68
1	middle			38.45	6.1			19.95	2.42
1	middle			36.67	5.76			22.65	2.42
1	middle			35.31	6.06			26.7	2.46
1	middle			43.28	6.62			27.07	2.95
1	middle			45.11	7.46			23.09	2.75
1	middle			43.06	7.04			25.26	2.76
1	middle			38.5	7			25.6	2.81
1	middle			29.71	4.47			26.29	2.88
1	middle			35.81	5.76			23.63	2.94
1	middle			35.07	5.61			27.59	2.57
1	middle			36.55	5.76
1	middle			35.21	5.78
1	middle			30.14	4.83
1	middle			37.41	7.06
1	middle			43.03	7.45
1	middle			40.46	7.11	31.12	4.57	23.68	2.91
1	middle			42.61	6.41	31.42	4.55	28.49	2.88
1	middle			40.31	6.25	38.9	4.26	33.49	3.31
1	middle			45.79	6.97	36.07	4.53	28.76	2.6
1	middle			45.09	6.88	32.34	4.08	28.8	3.29
1	middle			39.65	6.96	34.22	4.17	22.71	2.78
1	middle			36.44	6.05	32.04	4.14	24.94	2.85
1	middle			41.33	6.6	30.55	3.77	27.32	3.1
1	middle			40.31	6.51	32.64	4.14	24.09	3.27
1	middle			37.66	6.26	30.55	3.77	25.47	2.67
1	middle			29.74	8.03	36.13	3.86	25.96	3.38
1	middle			42.74	8.48	37.58	3.99	23.24	2.6
1	middle			37.74	6.35	31.74	3.8	25.82	3.18
1	middle			45.93	7.24	37.3	4.48	26.89	3.05
1	middle			32.08	5.21	33.17	4.23	21.65	2.89
1	middle			33.15	5.85	28.81	3.97	21.92	2.55
1	middle			42.49	6.43	33.79	4.94	25.54	3.2
1	middle			46.37	8.18	35.68	4.57	25.23	2.94
1	middle			46.29	6.7	36.24	4.92	22.26	2.5
1	middle			36.81	5.19	41.42	5.5	30.83	3.03
1	middle			41.34	6.96	33.38	4.8	25.96	2.38
1	middle			37.5	5.75	31.39	3.77	22.05	2.35
1	middle			39.01	7.93			22.33	2.68
1	middle			36.03	6.16			28.99	2.88
1	middle			41.23	6.53			22.91	2.85
1	middle			46.61	9.67			26.03	3.06
1	middle			40.26	6.8			26.03	3.06
1	middle			40.63	7.07			34.44	3.17
1	middle			36.03	6.16			26.8	2.68
1	middle			21.16	3.51			15.42	1.65
1	middle			22.51	4.56			15.07	1.84
1	middle			23.95	4.31			19.11	1.89
1	middle			24.38	4.38			12.29	1.89
1	middle			19.13	2.65			15.46	1.56
1	middle			29.13	4.84			19.07	1.8
1	middle			24	5.02			15.84	1.59
1	middle			20.55	3.23			16.13	1.83
1	middle			23.93	4.12			19.3	2.05
1	middle			20.97	3.72			17.07	1.73
1	middle			20.59	4.4			17.92	1.71
1	middle			24.71	5.12			15.56	1.87
1	middle			30.03	6.3			17.41	1.95
1	middle			18.39	3.03			20.35	1.76
1	middle			24.46	4.16			16.36	2.1
1	middle			20.84	3.55			16.01	1.78
1	middle			20.79	3.6			16.18	2.07
1	middle			21.88	3.74			14.93	1.52
1	middle			27.54	5.65			15.12	1.79
1	middle			25.94	3.34			16.24	1.68
1	middle			24.33	3.98			15.67	1.87
1	middle			22.95	3.57			19.32	1.78
1	middle			28.62	4.14			13.32	1.81
1	middle			23.36	3.58			16.54	1.63
1	middle			22.21	3.66			18.8	1.88
1	middle			19.12	2.78			17.59	2.28
1	middle			21.23	3.27			17.19	1.81
1	middle			25.04	3.91			13.98	1.6
1	middle			23.93	3.97			17.28	1.84
1	middle			21.01	3.24			17.57	1.44
1	middle			27.96	5.02			16.62	1.5
1	middle			28.16	5.21			15.09	2.12
1	middle			24.22	5.23			15.94	1.81
1	middle			23.27	4.22			15.53	1.7
1	middle			24.57	4.29			16.03	1.77
1	middle			25.29	5.49			15.58	1.49
1	middle			21.48	4.43			17.14	1.74
1	middle			28.86	6			15.44	1.6
1	middle			23.1	4.46			18.79	1.86
1	middle			20.92	4			15.28	1.45
1	middle			25.4	3.98			14.65	1.58
1	middle			21.31	3.62			15.08	1.54
1	middle			29.47	4.23			15.94	1.22
1	middle			24.42	3.76			18.22	1.97
1	middle			23.39	5.06			15.01	1.66
1	middle			25.13	4.51			18.83	1.91
1	middle			25.61	4.35			18.56	1.89
1	middle			21.01	3.92			15.21	1.88
1	middle			29.79	5.11			15.32	1.77
1	middle			27.11	4.36			17.54	1.53
1	middle			23.98	4.16			15.48	1.56
1	middle			26.92	4.98			17.51	1.9
1	middle			28.17	3.85			15.35	1.68
1	middle			27.17	3.69			15.83	1.68
1	middle			24.34	3.72			15.22	1.63
1	middle			27.8	4.46			15.92	1.55
1	middle			25.71	5.5			14.67	1.42
1	middle			27.63	4.69			15.59	1.67
1	middle			23.37	4.25			14.23	1.63
1	middle			29.76	5.88			17.43	1.43
2	middle			25.74	3.17
2	middle			20.26	4.03
2	middle			25.43	3.93
2	middle			20.99	3.23
2	middle			18.73	2.63
2	middle			22.14	3.32
2	middle			20.62	3.44
2	middle			19.79	3.12
2	middle			23.36	3.79
2	middle			20.13	2.73
2	middle			22.16	3.86
2	middle			18.07	2.76
2	middle			21.03	3.28
2	middle			23.44	3.73
2	middle			20.66	3.27
2	middle			17.73	2.82
2	middle			20.54	4.33
2	middle			17.55	3.18
2	middle			20.37	3.48
2	middle			23.02	3.78
2	middle			19.07	3.73
2	middle			23.64	4.16
2	middle			16.99	4.05
2	middle			19.94	2.82
2	middle			20.19	3.04
2	middle			20.61	3.19
2	middle			20.34	3.15
2	middle			20.82	3.94
2	middle			16.89	2.87
2	middle			18.8	3.05
2	middle			26.7	4.87			18.71	2.39
2	middle			21.49	4.8			19.54	2.46
2	middle			21.49	4.26			17.5	2.14
2	middle			26.12	4.47			21.57	2.46
2	middle			27.05	5.04			18.03	2.41
2	middle			27.69	5.51			14.26	1.84
2	middle			24.41	4.39			22.5	2.4
2	middle			25.71	4.48			17.55	2.04
2	middle			26.87	4.78			14.25	1.81
2	middle			23.09	3.62			14.27	2.16
2	middle			24.26	5.77			16.39	1.71
2	middle			21.39	4.78			19.75	2.22
2	middle			21.7	2.89			16.51	2.28
2	middle			26.69	6			19.15	2.27
2	middle			26.5	4.03			17.14	2.15
2	middle			22.62	4.44			14.39	2.09
2	middle			24.19	3.87			19.9	2.07
2	middle			24.68	4.06			17.86	2.03
2	middle			27.2	4.89			14.6	1.85
2	middle			24.17	3.75			18	1.72
2	middle			24.21	5.23			18.36	2.07
2	middle			22.63	4.44			14.81	2.11
2	middle							13.8	1.85
2	middle							16.3	1.87
2	middle							17.86	2.09
2	middle							15.52	1.82
2	middle							16.81	1.97
2	middle							16.64	1.52
2	middle							17.98	1.93
2	middle							16.54	2.05
2	middle			27.87	5.11
2	middle			27.04	4.1
2	middle			21.92	3.32
2	middle			25.39	4.17
2	middle			27.88	5.77
2	middle			24.62	3.51
2	middle			24.56	4.13
2	middle			28.27	5.08
2	middle			24.69	4.84
2	middle			29.07	4.61
2	middle			21.21	3.34
2	middle			25.94	5.08
2	middle			24.36	4.29
2	middle			27.69	4.68
2	middle			26.08	4.55
2	middle			24.98	4.93
2	middle			19.92	4.16
2	middle			26.37	5.04
2	middle			26.99	4.53
2	middle			26.84	5.25
2	middle			25.42	5.13
2	middle			30.2	4.68
2	middle			25.55	4.93
2	middle			29.79	5.15
2	middle			27.83	4.92
2	middle			22.63	4.39
2	middle			24.95	4.36
2	middle			26.68	4.43
2	middle			23.75	4.92
2	middle			23.32	4.58
2	middle			24.33	4.15
2	middle			24.33	3.9
2	middle			24.33	4.03
2	middle			24.33	3.56
2	middle			24.33	3.43
2	middle			24.33	4.79
2	middle			24.33	5.28
2	middle			24.33	3.7
2	middle			24.33	4.01
2	middle			24.33	3.55
2	middle			24.33	3.33
2	middle			24.33	3.58
2	middle			24.33	3.75
2	middle			24.33	3.84
2	middle			24.33	3.66
2	middle			24.33	4.26
2	middle			24.33	4.81
2	middle			24.33	4.51
2	middle			24.33	4
2	middle			22.36	4.05
2	middle			23	3.74
2	middle			23.85	3.92
2	middle			23.29	4.42
2	middle			25.27	4.26
2	middle			29.06	4.66
2	middle			24.73	4.15
2	middle			22.13	4.55
2	middle			24.11	4.44
2	middle			23.17	3.61
2	middle			23.78	4.9
3	middle							13.42	2.87
3	middle							14.65	2.51
3	middle							16.04	2.75
3	middle							13.61	2.27
3	middle							16.3	2.62
3	middle							16.68	2.95
3	middle							18.41	2.61
3	middle							16.19	2.75
3	middle							15.83	2.61
3	middle							20.75	2.44
3	middle							18.69	2.49
3	middle							16.13	3.14
3	middle							14.3	2.66
3	middle							17.97	2.46
3	middle							13.86	1.98
3	middle							15.6	2.44
3	middle							13.67	2.9
3	middle							16.93	2.38
3	middle							19.12	2.67
3	middle							16.75	2.47
3	middle							14.83	2.55
3	middle							14.18	1.55
3	middle							15.29	2.11
3	middle							16.63	2.48
3	middle							14.07	1.96
3	middle							13.9	2.17
3	middle							13.81	2.11
3	middle							14.54	2.02
3	middle							14.31	1.63
3	middle							16.66	2.74
3	middle							13.9	2.24
3	middle			22.86	4.2
3	middle			25.13	5.09
3	middle			23.92	5.2
3	middle			21.37	4.46
3	middle			25.16	4.72
3	middle			20.76	3
3	middle			21.23	5.33
3	middle			24.37	3.99
3	middle			24.29	4.09
3	middle			21.39	4.23
3	middle			23.98	4.36
3	middle			19.48	3.59
3	middle			25.52	4.14
3	middle			21.54	5.07
3	middle			22.72	5.42
3	middle			19.02	2.97
3	middle			23.84	5.34
3	middle			22.76	4.14
3	middle			22.05	4.48
3	middle			23.97	4.51
3	middle			20.75	4.2
3	middle			20.65	3.53
3	middle			20.97	3.78
3	middle			25.46	5.04
3	middle			23.8	3.56
3	middle			25.71	4.45
3	middle			20.66	4.55
3	middle			20.75	3.63
3	middle			23.37	4.41
3	middle			18.53	3.22
3	middle	23.46	5.35	25.1	6.21
3	middle	23.34	5.77	21.92	4.76
3	middle	24.61	4.01	22.13	4.84
3	middle	26.28	5.63	20.63	5.11
3	middle	22.95	4.45	24.28	5.43
3	middle	24.66	4.35	21.74	3.28
3	middle	25.04	3.86	24.51	4.05
3	middle	25.05	4.8	21.18	4.26
3	middle	21.91	4.61	23.18	4.42
3	middle	22.03	4.06	21.39	3.83
3	middle	22.7	4.79	24.38	4.73
3	middle	24.79	4.19	24.05	4.88
3	middle	24.31	4.19	26.9	4.63
3	middle	24.79	3.96	24.7	3.64
3	middle	23.16	4.29	31.11	4.99
3	middle	23.37	4.12	24.33	3.85
3	middle	24.26	4.47	24.29	4.1
3	middle	25.41	4.36	26.47	4.12
3	middle	25.72	4.18	24.96	4.9
3	middle	25.95	4.21	21.77	3.8
3	middle	23.7	4.9	26.67	4.78
3	middle	22.03	4.9	22.34	3.53
3	middle	21.94	4.05	29.54	5.36
3	middle	24.29	3.48	23.64	4.22
3	middle	20.27	4.06	29.14	4.87
3	middle			21.17	3.48
3	middle			25.63	3.87
3	middle			23.83	4.21
3	middle
4	middle			36.78	6.32			20.68	2.91
4	middle			32.69	5.5			20.03	2.68
4	middle			33.83	6.93			27.89	1.7
4	middle			31.28	6.13			18.21	3.14
4	middle			27.95	5.07			25.66	2.87
4	middle			32.1	6.3			22.76	2.24
4	middle			34.67	6.79			18.01	2.82
4	middle			32.46	7.27			23.1	2.2
4	middle			26.87	5.9			24.34	2.95
4	middle			32.4	7.28			24	2.04
4	middle			36.44	9.26			24.03	2.35
4	middle			31.01	6.44			22.14	2.03
4	middle			33.04	6.54			23.43	2.04
4	middle			37.18	9.58			22.24	2.97
4	middle			34.59	6.42			18.71	3.16
4	middle			36.63	7.26			21.75	2.4
4	middle			30.66	5.87			20.54	3.08
4	middle			32.8	3.97			26.82	1.91
4	middle			35.88	6.56
4	middle			30.98	5.54
4	middle			36.54	6.19
4	middle			34.25	5.46
4	middle			29.03	3.46
4	middle			29.66	4.81
4	middle			37.53	5.68
4	middle
4	middle
4	middle
4	middle
4	middle
4	middle			20.79	4.96	17.63	2.88	13.29	1.57
4	middle			22.43	4.57	17.42	2.67	12.04	1.42
4	middle			21	4.5	20.36	2.48	12.04	1.38
4	middle			23.65	4.46	18.12	2.81	10.46	1.84
4	middle			21.46	5.1	18.15	2.38	10.49	1.44
4	middle			24	5.08	19.55	3.35	10.13	1.48
4	middle			21.27	4.08	16.26	3.38	13.1	1.8
4	middle			17.91	3.68	16.5	2.86	11.81	1.83
4	middle			23.82	4.36	21.45	2.82	10.33	1.69
4	middle			20.47	4.17	19.16	2.64	12.35	1.61
4	middle			21.25	4.1	18.11	2.82	12.59	1.95
4	middle			19.05	4.23	19.69	2.42	11.63	2
4	middle			20.42	3.89	19.36	2.3	11.25	1.64
4	middle			20.42	3.84	17.81	2.48	11.86	1.98
4	middle			22.36	4.26	18.3	2.65	12.47	1.63
4	middle			20.06	3.98	18.94	2.32	11.49	1.72
4	middle			20.66	3.85	19.46	2.5	13.17	1.65
4	middle			25.03	4.68	19.83	3.29	11.49	1.5
4	middle			23.13	5	19.1	2.51	12.55	1.63
4	middle			23.79	4.71	16.51	2.28	11.43	1.64
4	middle			22.21	4.2	18.2	1.92	10.31	1.82
4	middle			23.17	4.14	18.39	2.19	11.37	1.8
4	middle			24.82	3.95	19.94	3.43	11.61	1.34
4	middle			22.22	4.09	18.41	2.93	11.23	1.74
4	middle			20.58	3.61	21.02	3.76	12.02	1.31
4	middle			18.85	3.79	17.88	2.95	11.14	2.02
4	middle			23.09	3.95	18.65	2.8	10.85	1.47
4	middle			21.46	4.02	18.15	3.03	11.29	4.9
4	middle			21.27	3.8			11.63	1.99
4	middle			19.87	2.92			12.97	1.96
4	middle			16.49	3.5			12.9	1.39
4	middle			24.85	3.8			12.02	1.32
4	middle			17.94	3.43			16.33	1.75
4	middle			20.74	2.75			12.82	1.46
4	middle			20.06	3.37			12.43	1.27
4	middle			20.78	3.69			12.2	1.67
4	middle			20.5	5.05			11.26	1.34
4	middle			21.57	4.24			13.32	1.31
4	middle			20.23	3.46			10.96	2
4	middle			22.05	3.79			13.74	1.35
4	middle			17.26	3.22			15.38	1.54
4	middle			20.2	3.66			15.58	2.52
4	middle			19.21	2.85			12.91	1.28
4	middle			18.82	3.05			11.69	1.6
4	middle			17.94	3.2			13.76	1.57
4	middle			21.56	3.57			14.05	1.35
4	middle			16.68	2.77			13.75	1.57
4	middle			18.25	3.62			11.56	1.44
4	middle			16.22	2.59			11.06	1.8
4	middle			20.37	4.2			13.04	1.98
4	middle			18.9	3.76			14.74	1.81
4	middle			16.43	2.88			12.2	1.47
4	middle			19.4	3.57			12.2	1.31
4	middle			21.84	4.04			15.12	1.83
4	middle			16.8	3.14			15.61	1.42
4	middle			20.6	3.97			12.93	1.58
4	middle			19.27	3.05
4	middle			20.83	3.8
4	middle			15.99	2.66
4	middle			21.83	3.73
4	middle			16.29	3.09			13.32	1.83
4	middle			19.2	3.68			16.14	1.74
4	middle			19.66	3.66			15.57	1.74
4	middle			18.66	2.89			16.99	1.89
4	middle			20.04	2.8			14.48	1.56
4	middle			19.83	3.14			14.25	1.78
4	middle			17.42	2.76			11.41	1.38
4	middle			17.88	3.28			15.19	1.71
4	middle			21.38	4.13			14.55	1.67
4	middle			16.35	3.53			13.69	1.85
4	middle			18.99	2.98			13.9	1.64
4	middle			18.18	3.08			12.04	1.82
4	middle			19.5	3.07			11.24	1.94
4	middle			17.72	3.29			15.29	1.68
4	middle			22.46	3.92			12.85	1.63
4	middle			16.46	3.27			16.27	1.98
4	middle			18.27	3.26			15.16	2.11
4	middle			17.69	3.79			12.76	2.05
4	middle			21.84	3.73			12.25	1.93
4	middle			18.38	3.32			11.04	1.82
4	middle			17.19	3.27			15.02	1.93
4	middle			17.46	3.37			14.1	1.82
4	middle			18.37	3.57			12.57	1.89
4	middle			17.26	3.69			14.69	1.74
4	middle			19.74	3.71
4	middle			22.82	4.57
4	middle			18.91	3.73
4	middle			15.31	3.23
4	middle			18.02	3.69
4	middle			22.06	4.06
5	middle			32.22	8.33
5	middle			37.48	7.01
5	middle			34	6.95
5	middle			32.39	5.09
5	middle			32.17	6.48
5	middle			31.47	6.57
5	middle			25.71	5.31
5	middle			31.14	7.05
5	middle			33.16	5.73
5	middle			31.14	5.32
5	middle			33.62	5.6
5	middle			32.48	6.46
5	middle			34.48	6.89
5	middle			31.05	8.48
5	middle			28.4	6.83
5	middle			35.43	6.68
5	middle			33.59	7.7
5	middle			32.05	7.6
5	middle			30.6	5.51
5	middle			29.6	7.06
5	middle			28.73	6.69
5	middle			32.57	6.95
5	middle			33	8.4
5	middle			32.51	5.97
5	middle			30.57	3.54
5	middle			30.47	5.64
5	middle			31.31	5.31
5	middle			28.9	5.02
5	middle			35.08	8.76
5	middle			30.63	4.7
5	middle			23.14	5.42
5	middle			26.99	6.11			18.23	2.71
5	middle			26.7	6.2			16.59	2.34
5	middle			30.68	6.38			17.85	2.64
5	middle			27.19	5.31			20.22	2.79
5	middle			29.14	5.88			18.68	3
5	middle			23.45	5.06			15.44	3.11
5	middle			22.98	5.19			15.42	2.63
5	middle			22.79	5.1			15.01	2.92
5	middle			25.33	5.95			16.2	2.59
5	middle			21.23	4.74			18.61	3.24
5	middle			23.18	6.12			17.53	2.01
5	middle			31.55	6.88			15.06	2.64
5	middle			24.75	5.37			16.83	2.6
5	middle			26.7	5.55			19.22	3.2
5	middle			23.69	6.28			18.16	2.54
5	middle			24.76	6.47			17.19	3.45
5	middle			21	5.08			18.9	3.05
5	middle			23.18	5.8			14.97	2.42
5	middle			26.41	5.13			22.43	2.34
5	middle			25.64	5.47			17.89	3.25
5	middle			31.59	5.73			16.98	3.01
5	middle			24.52	4.68			18.92	2.66
5	middle			24.7	6.8			16.53	2.68
5	middle			23.04	5.84			20.92	2.85
5	middle			29.81	6.43			19.89	2.33
5	middle			27.4	6.32			16.65	2.62
5	middle			23.21	5.59			16.22	2.84
5	middle			26.56	5.55			20.54	2.78
5	middle			28.8	6.37			18.12	2.56
5	middle			27.81	5.52
5	middle			21.39	4.05
5	middle			26.72	5.13
5	middle			23.61	4.94
5	middle			26.64	5.34
5	middle			29.46	7.01
5	middle			30.35	5
5	middle			27.66	7.25
5	middle			27.4	5.97
5	middle			27.95	5.05
5	middle			26.2	5.19
5	middle			26.97	5.26
5	middle			27.66	5.57
5	middle			30.9	5.15
5	middle			28.44	4.65
5	middle			32.03	4.97
5	middle			26.33	4.88
5	middle			29.18	5.63
5	middle			26.96	4.61
5	middle			31.44	5.39
5	middle			30.78	5.82
5	middle			29.35	5.22
5	middle			24.73	4.89
5	middle			26.81	4.73
5	middle			25.24	5.14
5	middle			27.68	4.84
5	middle			25.7	4.41
5	middle			28.55	5.32
5	middle			31.98	4.87
5	middle			28.93	4.54
5	middle			24.53	4.88			15.11	2.27
5	middle			25.64	5.59			21.08	2.94
5	middle			28.09	6.65			18.47	1.97
5	middle			25.99	5.59			21.74	2.69
5	middle			23.68	5.93			21.27	2.34
5	middle			25.86	6.15			22.99	2.63
5	middle			25.35	5.69			17.92	2.41
5	middle			30.77	6.21			20.08	2.39
5	middle			30.46	5.73			19.99	2.4
5	middle			26.13	4.83			18.76	2.25
5	middle			20.52	4.87			18.63	2.13
5	middle			22.93	5.25			21.45	2.45
5	middle			28.3	5.56			21.34	1.93
5	middle			27.02	6.05			14.77	2.36
5	middle			26.85	5.86			20.52	2.58
5	middle			23.2	5.08			18.53	2.37
5	middle			27.96	5.16			15.19	2.71
5	middle			28.95	5.08			18.21	2.62
5	middle			25.68	5.38			15.04	1.95
5	middle			26.56	5.46			21.18	2.41
5	middle			30.92	5.83			18.7	2.24
5	middle			24.53	5.53			15.02	2.51
5	middle			24.41	4.67			21.78	1.87
5	middle			27.85	5.78			20.16	1.97
5	middle			28.16	4.82			21.06	2.6
5	middle			28.19	5.5			22.33	2.39
5	middle			26.58	5.36			17.95	2.84
5	middle			24.54	5.38			19.11	2.92
5	middle			23.73	5.27			18.11	1.87
5	middle			25.68	4.23			19.97	2.24
6	middle			27.94	4.64			17.17	1.73
6	middle			27.62	5.5			19.94	2.49
6	middle			25.78	4.92			21.88	2.39
6	middle			29.18	6.61			18	2.27
6	middle			28.62	6.03			18.28	1.71
6	middle			27.17	6.84			19.74	2.39
6	middle			28.34	6.18			18.87	2.71
6	middle			22.72	5.01			14.91	1.91
6	middle			28.27	5.59			17.79	2.22
6	middle			34.22	5.58			17.94	2.33
6	middle			28.21	5.05			15.72	1.92
6	middle			25.72	5.75			15.72	1.86
6	middle			30.23	5.39			21.61	1.73
6	middle			30.97	5.52			21.56	2.16
6	middle			20.07	3.97			16.42	1.76
6	middle			24.81	4.24			17.47	2.21
6	middle			21.23	4.53			20.1	1.45
6	middle			21.94	4.14			16.28	1.89
6	middle			22.81	4.08			17.66	2.32
6	middle			25.35	4.3			16.83	1.87
6	middle			25.59	4.28			16.25	1.8
6	middle			26.46	5.19			19.42	1.8
6	middle			26.51	4.66			16.32	2.12
6	middle			20.79	4.24			15.49	1.93
6	middle			21.95	4.43			20.66	1.88
6	middle			25.15	4.94			19.87	1.85
6	middle			29.61	5.43			19.8	2.05
6	middle			28.57	4.33			17.48	1.97
6	middle			25.15	4.84			17.46	2.29
6	middle			26.3	5.08			20.61	1.8
6	middle			28.43	6.2
6	middle			28.76	5.86
[truncated: 1,686 more rows]

## Sheet: Cerianthus sp. proportions
Marginal Tentacles	cnida types
Level	atrich	mbI	mbII	mbIII	mbVII
Low	85.71	85.71	0	57.14	0
Middle	28.57	85.71	28.57	85.71	14.28
High	14.28	85.71	28.57	71.42	14.28
Labial Tentacles	cnida types
Level	atrich	mbI	mbII	mbIII	mbV	mbVI	mbVII
Low	75	75	50	25	25	50	25
Middle	0	50	75	25	0	50	25
High	0	50	50	50	0	25	50
Actinopharynx	cnida types
Level	atrich	mbI	mbIII
Low	100	83.33	0
Middle	100	50	16.66
High	100	50	16.66
Column	cnida types
Level	atrich	mbI	ptychocyst
Low	85.71	0	28.57
Middle	71.42	0	57.14
High	71.42	14.28	42.85
Metamesenteries	cnida types
Level	mbI
Low	100
Middle	100
High	100

## Sheet: Ceriantheomorphe brasiliensis proportions
Marginal Tentacles	cnida types
Level	atrich	mbI	mbII	mbIII	mbV	mbVI
Low	70	0	90	10	50	50
Middle	0	40	80	60	60	70
High	0	60	80	50	50	10
Labial Tentacles	cnida types
Level	atrich	mbI	mbII	mbIII	mbV
Low	80	100	50	100	20
Middle	30	100	80	100	20
High	0	90	70	90	30
Column	cnida types
Level	atrich	mbI	mbV	mbVI	holotrich	ptychocyst
Low	100	0	30	10	0	40
Middle	100	0	10	0	0	60
High	100	40	20	0	10	10
Actinopharynx	cnida types
Level	atrich	mbI	mbII	mbIII
Low	90	20	10	30
Middle	50	20	0	60
High	50	40	0	40
Metamesenteries	cnida types
Level	mbI	mbIV
Low	40	0
Middle	40	20
High	40	30
