# Supplementary material for: Cnidom in Ceriantharia (Cnidaria, Anthozoa): new findings in the composition and micrometric variations of cnidocysts
Source: PeerJ journal article supplement (doi:10.7717/peerj.15549), 2023-06-21
Supplement: Table_S1_revised.pdf [file Table_S1_revised.pdf]

**Table S1:**  
**Specimens collected and used in this study.**

N: number of specimens.

| <b>Species</b>                             |                                                      |                        |                         |
|--------------------------------------------|------------------------------------------------------|------------------------|-------------------------|
| Country                                    | Locality                                             | Coordinates            | Voucher code            |
| <b><i>Cerianthomorpha brasiliensis</i></b> |                                                      |                        |                         |
| Brazil                                     | Camburi Beach, Vitória, Espírito Santo               | 20°16'39"S, 40°16'29"W | UFRJ Biologia 0293/0337 |
|                                            | Arraial do Cabo, Rio de Janeiro                      | 23°04"S, 42°0'29"W     | MZSP 8470               |
|                                            | Caçarras Archipelago, Rio de Janeiro, Rio de Janeiro | 23°1'55"S, 43°11'58"W  | MZSP 8473               |
|                                            | Guanabara Bay, Rio de Janeiro, Rio de Janeiro        | 22°49'6"S, 43°8'45"W   | MNRJ 200                |
|                                            | Araçá Beach, São Sebastião, São Paulo                | 23°48'58"S, 45°24'24"W | MZSP 8472               |
|                                            | Pitangueiras Beach, São Sebastião, São Paulo.        | 23°49'22"S 45°24'36"W  | LEDAFCZOO 02            |
|                                            | Praia de Canasvieiras, Florianópolis, Santa Catarina | 27°25'31"S, 48°27'02"W | LEDAFCZOO 01            |
| Uruguay                                    | Montevideo                                           | 34°50'S 55°40'W        | LEDAFCZOO 03            |
|                                            | La Paloma, Rocha                                     | 34°42'3"S, 54°0.5'W    | UFRJ-Biologia 2-464 A   |
| <b><i>Cerianthus sp.</i></b>               |                                                      |                        |                         |
| Uruguay                                    | Punta del Este, Maldonado                            | 34°42'3"S, 54°0.5'W    | LEDAFCZOO 04-08         |
| Argentina                                  | Mar del Plata, Buenos Aires                          | 38°06'15"S 57°32'07"W  | LEDAFCZOO 09-10         |

Voucher collection acronyms: UFRJ (Federal University of Rio de Janeiro), MZSP (Museum of Zoology of the University of São Paulo), LEDAFCZOO (LEDA Laboratory collection).
