# Supplementary material for: Cnidom in Ceriantharia (Cnidaria, Anthozoa): new findings in the composition and micrometric variations of cnidocysts
Source: PeerJ journal article supplement (doi:10.7717/peerj.15549), 2023-06-21
Supplement: Table_S2_revised.pdf [file Table_S2_revised.pdf]

**Table S2a:**

***Ceriantheomorpha brasiliensis*. Comparison of cnidocyst lengths between individuals in the actinopharynx, column and metamesenteries.**

*P*-values of the t test for GLM coefficients ( $\beta_1$ ) for each cnidocyst type. Underlined *P*-values significant at  $\alpha=0.05$ .

| Specimen | Actinopharynx    |                  |                             | Column           | Metamesenteries  |                             |                              |
|----------|------------------|------------------|-----------------------------|------------------|------------------|-----------------------------|------------------------------|
|          | atrich I         | atrich II        | microbasic b-mastigophore I |                  | ptychocyst       | microbasic b-mastigophore I | microbasic b-mastigophore VI |
| 1        | ++               | ++               | <u>0.019</u>                | ++               | ++               | //                          |                              |
| 2        | //               | <u>0.012</u>     | ++                          | <u>0.037</u>     | //               | ++                          |                              |
| 3        | <u>&lt;0.001</u> | <u>&lt;0.001</u> | <u>0.005</u>                | 0.615            | //               | 0.182                       |                              |
| 4        | <u>&lt;0.001</u> | 0.904            | <u>0.014</u>                | <u>&lt;0.001</u> | <u>&lt;0.001</u> | //                          |                              |
| 5        | 0.0974           | <u>&lt;0.001</u> | <u>&lt;0.001</u>            | <u>&lt;0.001</u> | //               | //                          |                              |
| 6        | <u>&lt;0.001</u> | 0.113            | 0.393                       | 0.057            | //               | //                          |                              |
| 7        | <u>&lt;0.001</u> | <u>&lt;0.001</u> | <u>&lt;0.001</u>            | <u>&lt;0.001</u> | //               | //                          |                              |
| 8        | <u>&lt;0.001</u> | <u>&lt;0.001</u> | <u>&lt;0.001</u>            | //               | <u>0.013</u>     | <u>0.001</u>                |                              |
| 9        | <u>&lt;0.001</u> | 0.111            | <u>&lt;0.001</u>            | //               | 0.092            | //                          |                              |
| 10       | 0.058            | <u>&lt;0.001</u> | <u>&lt;0.001</u>            | <u>&lt;0.001</u> | 0.494            | <u>&lt;0.001</u>            |                              |

**Notes:**

++: cnidocyst used for comparisons; //: cnidocysts not found in the structure.

**Table S2b:**

***Ceriantheomorpha brasiliensis*. Comparison of cnidocyst lengths between individuals in marginal tentacles.**

*P*-values of the t test for GLM coefficients ( $\beta_1$ ) for each cnidocyst type. Underlined *P*-values significant at  $\alpha=0.05$ .

| Specimen | Marginal Tentacles          |                              |                               |                             |                              |
|----------|-----------------------------|------------------------------|-------------------------------|-----------------------------|------------------------------|
|          | microbasic b-mastigophore I | microbasic b-mastigophore II | microbasic b-mastigophore III | microbasic b-mastigophore I | microbasic b-mastigophore VI |
| 1        | ++                          | ++                           | //                            | ++                          | //                           |
| 2        | //                          | <u>&lt;0.001</u>             | //                            | <u>&lt;0.001</u>            | //                           |
| 3        | 0.483                       | <u>&lt;0.001</u>             | ++                            | <u>0.001</u>                | ++                           |
| 4        | //                          | <u>&lt;0.001</u>             | <u>&lt;0.001</u>              | //                          | <u>&lt;0.001</u>             |
| 5        | <u>&lt;0.001</u>            | <u>&lt;0.001</u>             | <u>&lt;0.001</u>              | 0.046                       | <u>&lt;0.001</u>             |
| 6        | 0.454                       | <u>&lt;0.001</u>             | <u>&lt;0.001</u>              | <u>&lt;0.001</u>            | <u>&lt;0.001</u>             |
| 7        | <u>&lt;0.001</u>            | <u>&lt;0.001</u>             | <u>&lt;0.001</u>              | //                          | <u>&lt;0.001</u>             |
| 8        | //                          | <u>&lt;0.001</u>             | <u>&lt;0.001</u>              | //                          | <u>&lt;0.001</u>             |
| 9        | <u>&lt;0.001</u>            | <u>&lt;0.001</u>             | <u>&lt;0.001</u>              | <u>&lt;0.001</u>            | <u>&lt;0.001</u>             |
| 10       | <u>&lt;0.001</u>            | <u>&lt;0.001</u>             | 0.139                         | <u>&lt;0.001</u>            | //                           |

**Notes:**

++: cnidocyst used for comparisons; //: cnidocysts not found in the structure.

**Table S2c:**

***Ceriantheomorpe brasiliensis*. Comparison of cnidocyst lengths between individuals in labial tentacles.**

*P*-values of the t test for GLM coefficients ( $\beta_1$ ) for each cnidocyst type. Underlined *P*-values significant at  $\alpha=0.05$ .

| Specimen | Labial Tentacles |                                |                                 |                                  |                                |
|----------|------------------|--------------------------------|---------------------------------|----------------------------------|--------------------------------|
|          | atrach           | microbasic<br>b-mastigophore I | microbasic<br>b-mastigophore II | microbasic<br>b-mastigophore III | microbasic<br>b-mastigophore V |
| 1        | ++               | ++                             | //                              | ++                               | ++                             |
| 2        | <u>&lt;0.001</u> | <u>&lt;0.001</u>               | ++                              | <u>&lt;0.001</u>                 | <u>&lt;0.001</u>               |
| 3        | //               | <u>&lt;0.001</u>               | <u>&lt;0.001</u>                | 0.035                            | //                             |
| 4        | <u>&lt;0.001</u> | <u>&lt;0.001</u>               | <u>&lt;0.001</u>                | <u>&lt;0.001</u>                 | //                             |
| 5        | <u>&lt;0.001</u> | <u>&lt;0.001</u>               | <u>&lt;0.001</u>                | 0.004                            | //                             |
| 6        | <u>&lt;0.001</u> | <u>&lt;0.001</u>               | <u>&lt;0.001</u>                | <u>&lt;0.001</u>                 | <u>&lt;0.001</u>               |
| 7        | //               | 0.837                          | <u>&lt;0.001</u>                | 0.051                            | //                             |
| 8        | <u>&lt;0.001</u> | <u>&lt;0.001</u>               | <u>&lt;0.001</u>                | <u>&lt;0.001</u>                 | //                             |
| 9        | <u>&lt;0.001</u> | <u>&lt;0.001</u>               | //                              | <u>&lt;0.001</u>                 | //                             |
| 10       | 0.005            | <u>&lt;0.001</u>               | <u>&lt;0.001</u>                | <u>&lt;0.001</u>                 | <u>&lt;0.001</u>               |

**Notes:**

++: cnidocyst used for comparisons; //: cnidocysts not found in the structure.
