# Supplementary material for: Cnidom in Ceriantharia (Cnidaria, Anthozoa): new findings in the composition and micrometric variations of cnidocysts
Source: PeerJ journal article supplement (doi:10.7717/peerj.15549), 2023-06-21
Supplement: Table_S3_revised.pdf [file Table_S3_revised.pdf]

**Table S3:****Representativeness of each cnidocyst type by level in each structure of *Ceriantheomorpha brasiliensis*.**

Number of individuals which presented each cnidocyst type over the total number of specimens studied.

| Structure/cnidocyst type       | Level |        |       |
|--------------------------------|-------|--------|-------|
|                                | low   | middle | high  |
| <b>Actinopharynx</b>           |       |        |       |
| atrich                         | 9/10  | 5/10   | 5/10  |
| microbasic b-mastigophore I    | 2/10  | 2/10   | 4/10  |
| microbasic b-mastigophore II   | 1/10  | 0/10   | 0/10  |
| microbasic b-mastigophore III  | 3/10  | 6/10   | 4/10  |
| <b>Column</b>                  |       |        |       |
| atrich*                        | 10/10 | 10/10  | 10/10 |
| microbasic b-mastigophore I    | 0/10  | 0/10   | 4/10  |
| microbasic b-mastigophore V    | 3/10  | 1/10   | 2/10  |
| microbasic b-mastigophore VI   | 1/10  | 0/10   | 0/10  |
| holotrich                      | 0/10  | 0/10   | 1/10  |
| ptychocyst                     | 4/10  | 6/10   | 1/10  |
| <b>Metamesenteries</b>         |       |        |       |
| microbasic b-mastigophore I    | 4/10  | 4/10   | 4/10  |
| microbasic b-mastigophore IV   | 0/10  | 2/10   | 3/10  |
| <b>Labial tentacles</b>        |       |        |       |
| atrich                         | 8/10  | 3/10   | 0/10  |
| microbasic b-mastigophore I*   | 10/10 | 10/10  | 9/10  |
| microbasic b-mastigophore II   | 5/10  | 8/10   | 7/10  |
| microbasic b-mastigophore III* | 10/10 | 10/10  | 9/10  |
| microbasic b-mastigophore V    | 2/10  | 2/10   | 3/10  |
| <b>Marginal tentacles</b>      |       |        |       |
| atrich                         | 7/10  | 0/10   | 0/10  |
| microbasic b-mastigophore I    | 0/10  | 4/10   | 6/10  |
| microbasic b-mastigophore II▲  | 9/10  | 8/10   | 8/10  |
| microbasic b-mastigophore III  | 1/10  | 6/10   | 5/10  |
| microbasic b-mastigophore V    | 5/10  | 6/10   | 5/10  |
| microbasic b-mastigophore VI   | 5/10  | 7/10   | 1/10  |

**Notes:**

\*present in ≥90% of the specimens studied in each and every level/total specimens studied ▲ present in ≥70% of the specimens studied in each and every level/total specimens.
