# Supplementary material for: Cnidom in Ceriantharia (Cnidaria, Anthozoa): new findings in the composition and micrometric variations of cnidocysts
Source: PeerJ journal article supplement (doi:10.7717/peerj.15549), 2023-06-21
Supplement: Table_S4_revised.pdf [file Table_S4_revised.pdf]

**Table S4:**

***Ceriantheomorpha brasiliensis*. ANOVA for the LMM or GLMM versus the null model for length of different cnidocyst types from the three levels of column and labial tentacles.**

| Cnidocyst type (Structure)/Models                          | <i>npar</i> | AIC    | logLik   | deviance | Chisq  | <i>Df</i> | Pr(>Chisq)       |
|------------------------------------------------------------|-------------|--------|----------|----------|--------|-----------|------------------|
| <b>Atrich (Column)</b>                                     |             |        |          |          |        |           |                  |
| Atrich length ~ level ♦                                    | 4           | 5290.2 | -2641.1  | 5282.2   |        |           |                  |
| Atrich length ~ level + (1   Individual)▲*                 | 5           | 4798.1 | -2394.1  | 4788.1   | 494.12 | 1         | <u>&lt;0.001</u> |
| <b>Microbasic b-mastigophore I (Labial tentacles)</b>      |             |        |          |          |        |           |                  |
| Microbasic b-mastigophore I ~ level◇                       | 4           | 20700  | -10346.1 | 20692    |        |           |                  |
| Microbasic b-mastigophore I ~ level + (1   Individual)▶*   | 5           | 18691  | -9340.6  | 18681    | 2011   | 1         | <u>&lt;0.001</u> |
| <b>Microbasic b-mastigophore III (Labial tentacles)</b>    |             |        |          |          |        |           |                  |
| Microbasic b-mastigophore III ~ level◇                     | 4           | 12693  | -6342.6  | 12685    |        |           |                  |
| Microbasic b-mastigophore III ~ level + (1   Individual)▶* | 5           | 11173  | -5581.6  | 18783    | 1521.9 | 1         | <u>&lt;0.001</u> |

**Notes:**

\*best model. *npar*: number of parameters; AIC: Akaike Information Criterion for the model evaluated as  $-2 \times (\logLik - npar)$ ; logLik: log-likelihood for the model. ♦ null LM; ▲ LMM; ◇ null GLM; ▶ GLMM. Underlined *P*-values significant at  $\alpha=0.05$ .
