# Supplementary material for: Cnidom in Ceriantharia (Cnidaria, Anthozoa): new findings in the composition and micrometric variations of cnidocysts
Source: PeerJ journal article supplement (doi:10.7717/peerj.15549), 2023-06-21
Supplement: Table_S5_revised.pdf [file Table_S5_revised.pdf]

**Table S5:**

***Cerianthomorpha brasiliensis*. Standard deviation (SD) and variance of the random effects of the models fitted for length of cnidocysts.**

Units:  $\mu\text{m}$ . Models fitted: LMM for atrichs from the column; GLMM for microbasic b-mastigophores I and III from the labial tentacles.

|                                                         | <b>SD</b> | <b>variance</b> |
|---------------------------------------------------------|-----------|-----------------|
| <b>Atrich (Column)</b>                                  |           |                 |
| Individual                                              | 3.974     | 15.79           |
| Residual                                                | 3.922     | 15.38           |
| <b>Microbasic b-mastigophore I (Labial tentacles)</b>   |           |                 |
| Individual                                              | 1.284     | 1.648           |
| Residual                                                | 0.101     | 0.01            |
| <b>Microbasic b-mastigophore III (Labial tentacles)</b> |           |                 |
| Individual                                              | 0.886     | 0.785           |
| Residual                                                | 0.113     | 0.012           |
