# Supplementary material for: Cnidom in Ceriantharia (Cnidaria, Anthozoa): new findings in the composition and micrometric variations of cnidocysts
Source: PeerJ journal article supplement (doi:10.7717/peerj.15549), 2023-06-21
Supplement: Table_S6_revised.pdf [file Table_S6_revised.pdf]

**Table S6:**

***Ceriantheomorpha brasiliensis*. Length of cnidocysts estimated ( $\mu\text{m}$ ) and confidence intervals (CI) calculated for them in each structure and level by the models.**

Models fitted: LMM for atrichs from the column; GLMM for microbasic b-mastigophores I and III from the labial tentacles.

| Cnidocyst type (Structure)/Level                        | CI                          |          |          |
|---------------------------------------------------------|-----------------------------|----------|----------|
|                                                         | Estimated ( $\mu\text{m}$ ) | lower-95 | upper-95 |
| <b>Atrich (Column)</b>                                  |                             |          |          |
| low                                                     | 53.736                      | 51.229   | 56.243   |
| middle                                                  | 50.599                      | 47.439   | 53.76    |
| high                                                    | 44.296                      | 41.143   | 47.45    |
| <b>Microbasic b-mastigophore I (Labial tentacles)</b>   |                             |          |          |
| low                                                     | 44.02                       | 40.392   | 47.648   |
| middle                                                  | 42.018                      | 41.648   | 49.644   |
| high                                                    | 46.548                      | 42.521   | 50.575   |
| <b>Microbasic b-mastigophore III (Labial tentacles)</b> |                             |          |          |
| low                                                     | 25.524                      | 23.247   | 27.801   |
| middle                                                  | 23.625                      | 21.11    | 26.139   |
| high                                                    | 22.664                      | 20.108   | 25.219   |
