# Supplementary material for: Cnidom in Ceriantharia (Cnidaria, Anthozoa): new findings in the composition and micrometric variations of cnidocysts
Source: PeerJ journal article supplement (doi:10.7717/peerj.15549), 2023-06-21
Supplement: Table_S7_revised.pdf [file Table_S7_revised.pdf]

**Table S7a:*****Cerianthus sp.* Comparison of cnidocyst lengths between specimens in the actinopharynx, metamesenteries and marginal tentacles.**

*P*-values of the t test for GLM coefficients ( $\beta_1$ ) for each cnidocyst type. Underlined *P*-values significant at  $\alpha=0.05$ .

| Specimen | Actinopharynx    | Metamesenteries             | Marginal tentacles          |                              |                               |
|----------|------------------|-----------------------------|-----------------------------|------------------------------|-------------------------------|
|          | atrach I         | microbasic b-mastigophore I | microbasic b-mastigophore I | microbasic b-mastigophore II | microbasic b-mastigophore III |
| 1        | ++               | //                          | ++                          | ++                           | ++                            |
| 2        | 0.067            | ++                          | //                          | //                           | //                            |
| 3        | <u>&lt;0.001</u> | 0.126                       | //                          | //                           | //                            |
| 4        | <u>&lt;0.001</u> | <u>0.009</u>                | <u>&lt;0.001</u>            | <u>&lt;0.001</u>             | //                            |
| 5        | <u>&lt;0.001</u> | //                          | //                          | //                           | //                            |
| 6        | <u>&lt;0.001</u> | //                          | //                          | <u>&lt;0.001</u>             | <u>&lt;0.001</u>              |
| 7        | //               | //                          | //                          | //                           | //                            |

**Notes:**

++: cnidocyst used for comparisons; //: cnidocysts not found in the structure.

**Table S7b:*****Cerianthus sp.* Comparison of cnidocyst lengths between specimens in labial tentacles.**

*P*-values of the t test for GLM coefficients ( $\beta_1$ ) for each cnidocyst type. Underlined *P*-values significant at  $\alpha=0.05$ .

| Specimens | Labial tentacles |                             |                              |                               |
|-----------|------------------|-----------------------------|------------------------------|-------------------------------|
|           | atrach           | microbasic b-mastigophore I | microbasic b-mastigophore II | microbasic b-mastigophore III |
| 1         | ++               | ++                          | ++                           | ++                            |
| 2         | //               | <u>&lt;0.001</u>            | <u>&lt;0.001</u>             | 0.12                          |
| 3         | 0.701            | <u>&lt;0.001</u>            | //                           | <u>&lt;0.001</u>              |
| 4         | 0.225            | <u>&lt;0.001</u>            | //                           | <u>&lt;0.001</u>              |
| 5         | <u>&lt;0.001</u> | <u>&lt;0.001</u>            | <u>&lt;0.001</u>             | 0.827                         |
| 6         | 0.15             | <u>&lt;0.001</u>            | //                           | 0.569                         |
| 7         | <u>&lt;0.001</u> | //                          | //                           | //                            |

**Notes:**

++: cnidocyst used for comparisons; //: cnidocysts not found in the structure.
