# Supplementary material for: Cnidom in Ceriantharia (Cnidaria, Anthozoa): new findings in the composition and micrometric variations of cnidocysts
Source: PeerJ journal article supplement (doi:10.7717/peerj.15549), 2023-06-21
Supplement: Table_S8_revised.pdf [file Table_S8_revised.pdf]

**Table S8:****Representativeness of each cnidocyst type by level in each structure of *Cerianthus sp.***

Number of individuals which present each cnidocyst type over the total number of specimens studied.

| Structure/cnidocyst type      | Level |        |      |
|-------------------------------|-------|--------|------|
|                               | low   | middle | high |
| <b>Actinopharynx</b>          |       |        |      |
| atrich *                      | 6/6   | 6/6    | 6/6  |
| microbasic b-mastigophore I   | 5/6   | 3/6    | 3/6  |
| microbasic b-mastigophore III | 0/6   | 1/6    | 1/6  |
| <b>Column</b>                 |       |        |      |
| atrich I                      | 5/7   | 2/7    | 4/7  |
| atrich II                     | 4/7   | 3/7    | 2/7  |
| microbasic b-mastigophore I   | 0/7   | 0/7    | 1/7  |
| ptychocyst                    | 2/7   | 4/7    | 3/7  |
| <b>Metamesenteries</b>        |       |        |      |
| microbasic b-mastigophore I * | 3/3   | 3/3    | 3/3  |
| <b>Labial Tentacles</b>       |       |        |      |
| atrich                        | 6/7   | 2/7    | 1/7  |
| microbasic b-mastigophore I ▲ | 6/7   | 6/7    | 6/7  |
| microbasic b-mastigophore II  | 0/7   | 2/7    | 2/7  |
| microbasic b-mastigophore III | 4/7   | 6/7    | 5/7  |
| microbasic b-mastigophore VII | 0/7   | 1/7    | 1/7  |
| <b>Marginal Tentacles</b>     |       |        |      |
| atrich                        | 3/4   | 0/4    | 0/4  |
| microbasic b-mastigophore I   | 1/4   | 1/4    | 2/4  |
| microbasic b-mastigophore II  | 2/4   | 1/4    | 2/4  |
| microbasic b-mastigophore III | 1/4   | 2/4    | 1/4  |
| microbasic b-mastigophore V   | 1/4   | 0/4    | 0/4  |
| microbasic b-mastigophore VI  | 2/4   | 2/4    | 1/4  |
| microbasic b-mastigophore VII | 1/4   | 1/4    | 1/4  |

**Notes:**

\*present in  $\geq 90\%$  of the specimens studied in each and every level/total specimens; ▲ present in  $\geq 70\%$  of the specimens in each and every level/total specimens
