# Supplementary material for: Cnidom in Ceriantharia (Cnidaria, Anthozoa): new findings in the composition and micrometric variations of cnidocysts
Source: PeerJ journal article supplement (doi:10.7717/peerj.15549), 2023-06-21
Supplement: Table_S9_revised.pdf [file Table_S9_revised.pdf]

**Table S9:**

***Cerianthus sp.* ANOVA for the GLMM versus the null model for different cnidocyst types from the three levels of the actinopharynx and metamesenteries.**

| Cnidocyst type (Structure)/Models                                   | npar | AIC    | logLik  | deviance | Chisq  | Df | Pr(>Chisq)       |
|---------------------------------------------------------------------|------|--------|---------|----------|--------|----|------------------|
| <b>Atrich (Actinopharynx)</b>                                       |      |        |         |          |        |    |                  |
| Atrich length ~ level <sup>◊</sup>                                  | 4    | 3078.2 | -1535.1 | 3070.2   |        |    |                  |
| Atrich length ~ level + (1   Individual) <sup>▶*</sup>              | 5    | 2809   | -1399.5 | 2799     | 271.22 | 1  | <u>&lt;0.001</u> |
| <b>Microbasic b-mastigophore I (Metamesenteries)</b>                |      |        |         |          |        |    |                  |
| Microbasic b-mastigophore I ~ level <sup>◊*</sup>                   | 4    | 1228.2 | -610.1  | 1220.2   |        |    |                  |
| Microbasic b-mastigophore I ~ level + (1   Individual) <sup>▶</sup> | 5    | 1229.7 | -609.87 | 1219.7   | 0.4505 | 1  | 0.502            |

**Notes:**

\*best model. *npar*: number of parameters; AIC: Akaike Information Criterion for the model evaluated as  $-(\log\text{Lik} - n\text{par})$ ; logLik: log-likelihood for the model. ◊null GLM; ▶ GLMM. Underlined values significant at  $\alpha=0.05$ .
