# Supplementary material for: Cnidom in Ceriantharia (Cnidaria, Anthozoa): new findings in the composition and micrometric variations of cnidocysts
Source: PeerJ journal article supplement (doi:10.7717/peerj.15549), 2023-06-21
Supplement: Table_S10_revised.pdf [file Table_S10_revised.pdf]

**Table S10:**

***Cerianthus* sp. Standard deviation (SD) of random effects from the GLMM for the lengths of atrichs from the actinopharynx.**

|                               | SD    | variance | Groups |
|-------------------------------|-------|----------|--------|
| <b>Atrich (Actinopharynx)</b> |       |          |        |
| Individual                    | 1.409 | 1.986    | 6      |
| Residual                      | 0.016 | 0.128    |        |
