# Supplementary material for: Cnidom in Ceriantharia (Cnidaria, Anthozoa): new findings in the composition and micrometric variations of cnidocysts
Source: PeerJ journal article supplement (doi:10.7717/peerj.15549), 2023-06-21
Supplement: Table_S11_revised.pdf [file Table_S11_revised.pdf]

**Table S11:*****Cerianthus sp.* Length of cnidocysts estimated ( $\mu\text{m}$ ) and confidence intervals (CI) calculated for them in each structure and level by the models.**

Models fitted: GLMM for atrichs from the actinopharynx; GLM for microbasic b-mastigophores I from the metamesenteries.

| Cnidocyst type (Structure)/Level                     | Estimate ( $\mu\text{m}$ ) | CI       |          |
|------------------------------------------------------|----------------------------|----------|----------|
|                                                      |                            | lower-95 | upper-95 |
| <b>Atrich (Actinopharynx)</b>                        |                            |          |          |
| low                                                  | 30.991                     | 27.353   | 34.628   |
| middle                                               | 29.317                     | 24.907   | 33.726   |
| high                                                 | 33.806                     | 29.316   | 38.296   |
| <b>Microbasic b-mastigophore I (Metamesenteries)</b> |                            |          |          |
| low                                                  | 18.947                     | 18.49    | 19.42    |
| middle                                               | 19.108                     | 17.986   | 20.246   |
| high                                                 | 19.316                     | 18.19    | 20.457   |
